# Supplementary material for: Integrative and Comparative Genomic Analysis of HPV-Positive and HPV-Negative Head and Neck Squamous Cell Carcinomas
Source: Oxford University Press journal article supplement (doi:10.1158/1078-0432.ccr-13-3310), 2014-07-24
Supplement: 10780432ccr133310-sup-123900_2_supp_2466683_n5bq1c.xlsx [file 10780432ccr133310-sup-123900_2_supp_2466683_n5bq1c.xlsx]

## Sheet: S1(A) capture gene list
Supplementary Table S1(A) Capture Gene List
AASS
ABAT
ABCA12
ABCA4
ABCA6
ABCA9
ABCD2
ABHD13
ABI3
ABL1
ABL2
ABR
ACACB
ACE
ACTC1
ACVR2A
ADAM12
ADAM18
ADAMTS12
ADAMTS5
ADAMTSL1
ADCY8
AHNAK
AIM1
AKT1
AKT2
AKT3
ALLC
AMD1
ANKRD17
ANO4
APC
APOB
ARFGEF2
ARHGAP30
ARID1A
ARID5B
ARL13B
ASCL4
ASH1L
ASPSCR1
ASXL1
ATIC
ATM
ATRX
AXDND1
AXL
B2M
BAGE2
BAP1
BAZ1B
BBS9
BBX
BCL11B
BCL6
BCL7A
BCL9
BCORL1
BIRC3
BLM
BRAF
BRCA1
BRCA2
BRD4
BRIP1
BZRAP1
C11orf16
C19orf26
C19orf57
C1orf173
C1QL2
C7orf23
CABIN1
CAMK2B
CARD11
CASP8
CASR
CBFA2T3
CBL
CCNA1
CCND1
CCND2
CCND3
CCNE1
CCR5
CD248
CD274
CD300LF
CD3D
CD79A
CD8A
CDADC1
CDH1
CDH10
CDH11
CDH12
CDH16
CDH9
CDK4
CDKN2A
CDKN2B
CDKN2C
CDKN2D
CDX2
CELSR3
CETN1
CHD1L
CHD5
CHEK2
CIC
CLCN4
CLSTN2
CLTCL1
CNGA3
CNTN6
CNTNAP2
COL11A1
COL1A1
COL1A2
COL22A1
COL6A3
COQ3
CPNE4
CREB1
CREB3L2
CREBBP
CSF1R
CSMD3
CSNK1G1
CTNNB1
CTNND2
CUBN
CUL3
CYLD
CYP26A1
DAXX
DCC
DCT
DCTN2
DDI1
DDR2
DDX3X
DEK
DGKG
DICER1
DMC1
DNAH3
DNAH5
DNMT3A
DOK6
DPPA4
DPYS
DSCAM
DSEL
DST
DUSP1
DUSP5
DYRK1B
E2F3
E2F7
EBF1
EFCAB6
EGFR
EIF2AK1
EIF4A3
ELFN2
ELP4
ENPP2
EP300
EPDR1
EPHA1
EPHA2
EPHA3
EPHA4
EPHA7
EPHB1
EPHB4
EPS8
ERBB2
ERBB3
ERBB4
ERCC5
ERN2
ETV1
ETV4
ETV5
ETV6
EWSR1
EXOC4
EXT2
EZH2
F13B
FAAH2
FAM134C
FAM135B
FAM179B
FAM5B
FANCA
FANCB
FANCC
FANCD2
FANCE
FANCF
FANCG
FANCL
FANCM
FARP2
FAT1
FAT2
FAT4
FBXO42
FBXW7
FEV
FGFR1
FGFR2
FGFR3
FLG
FLG2
FLT3
FOXK1
FOXP1
FSTL5
GABRA4
GABRB3
GALNT14
GAS7
GATA3
GC
GCM2
GLI1
GMPS
GNAQ
GNAS
GPC5
GPR107
GPR115
GPR174
GPR20
GRID1
GRM8
GUF1
H3F3C
HBS1L
HCRTR2
HDX
HEPH
HERC2
HIP1
HIST1H2AK
HIST1H2BF
HIST1H4B
HIST1H4E
HIST1H4H
HIST2H2BE
HLA-A
HLA-B
HLA-C
HNRNPA2B1
HOOK3
HOXD13
HRAS
HUWE1
HYDIN
IL6ST
INO80
INPP4A
INPP4B
INPP5A
INPP5D
INTS3
IRF6
ITK
JAK1
JAK2
JAK3
KCNA6
KCNK18
KCTD8
KDM5A
KDM5C
KDR
KEAP1
KIAA1468
KIAA1549
KIAA2022
KIF1B
KIT
KLHDC7A
KNDC1
KRAS
LAMA1
LAMB1
LARS2
LILRA5
LILRB1
LIMK1
LMX1A
LPP
LRFN5
LRP1B
LRRC37B
LRRK2
LRRTM1
LRRTM3
LTBP1
LTK
MACF1
MAFA
MAGEC1
MAGEC2
MAML2
MAP2
MAP2K4
MAP3K1
MAP3K8
MAPK9
MAPKBP1
MCOLN2
MDM2
MDM4
ME1
MECOM
MED1
MEF2C
MELK
MET
MLF1
MLH1
MLL2
MLL3
MLLT10
MLLT4
MLLT6
MMP16
MPL
MRE11A
MSH3
MSH6
MST1R
MTA2
MTOR
MX2
MYC
MYCL1
MYD88
MYH1
MYH11
MYH13
MYH6
MYH8
MYH9
NACA
NAV3
NBPF3
NCOR1
NECAB1
NEK5
NELL2
NETO2
NF1
NF2
NFATC3
NFE2L2
NFIB
NIN
NKAP
NKAPL
NKX2-1
NLRP11
NLRP12
NLRP4
NONO
NOS1AP
NOTCH1
NOTCH2
NOTCH3
NRAP
NRAS
NRK
NRXN2
NRXN3
NSD1
NTRK1
NTRK3
NUDT11
NUDT14
NUMA1
NUP214
NUP43
ODZ1
OGDH
OR4C15
OR51S1
OR5L2
OR7D2
OR8H2
OR8K1
PAK7
PALB2
PANK4
PARK2
PARP1
PARP10
PAX1
PAX3
PAX9
PBRM1
PBX1
PBX3
PCDH15
PCDH17
PCDHA8
PCDHB11
PCDHB2
PCDHB4
PCLO
PCM1
PDE1B
PDE3A
PDE4DIP
PDGFB
PDGFRA
PEG3
PER1
PHGDH
PHIP
PHKA2
PHKB
PHLPP1
PHLPP2
PIK3AP1
PIK3C2A
PIK3C2B
PIK3C2G
PIK3C3
PIK3CA
PIK3CB
PIK3CD
PIK3CG
PIK3R1
PIK3R2
PIK3R3
PIK3R6
PIM1
PIM2
PKD1L1
PKHD1
PKHD1L1
PKP4
PLAG1
PLCB1
PLEC
PLEKHG4B
PLXNA3
PML
PMS1
PMS2
POLQ
POMT1
POU5F1
PPM1D
PPP1R16B
PPP1R9A
PPP4R4
PRB4
PRCC
PRDM11
PRDM9
PRKAR1A
PRKCA
PRKCB
PROKR2
PTEN
PTK2B
PTK6
PTN
PTPN11
PTPN6
PTPRF
PVRL3
PXN
PZP
RAC1
RAD51B
RAD51C
RAF1
RALGDS
RANBP17
RARG
RASA1
RB1
RB1CC1
RBM15
RECQL4
REL
RELN
REST
RET
RGAG1
RHOA
RIMBP2
RIMS2
RIPK1
RIPK4
RNGTT
ROS1
RPS6KB1
RUFY1
RUNX1
RXFP3
SBDS
SETBP1
SETD1A
SETD2
SFMBT2
SI
SLC26A3
SLC2A13
SLC4A3
SLC7A14
SLC9A3R1
SLCO4C1
SLCO5A1
SLITRK3
SLX4
SMAD1
SMAD4
SMARCA4
SMC6
SMO
SPAG17
SPIC
SPTA1
SPTBN4
SPTLC2
SRC
SRGAP3
SRPK2
ST8SIA5
STAB1
STAT1
STAT3
STK11
STYK1
SUGP2
SUMF1
SYNE1
SYNE2
TAL1
TAP1
TAP2
TC2N
TDRD3
TET2
TEX15
TFE3
TFRC
TGFB1I1
TGFBR2
THSD7A
TLN2
TLX1
TMEM132D
TMEM225
TMPRSS2
TNFAIP3
TNFRSF14
TP53
TP63
TPM3
TPP2
TPRX1
TRAF3
TRIO
TRIP11
TRRAP
TSC1
TSC2
TSSK6
TTN
TYRO3
UBE3A
UBE4A
UBR5
UNC5D
USH2A
USP26
USP6
VARS
VHL
VN1R4
VPS41
VWA5A
WAS
WBSCR17
WDR63
WHSC1
WHSC1L1
WIPF2
WRN
WT1
XPC
XRCC6
YBX1
YTHDC1
ZCCHC14
ZEB2
ZFHX4
ZIC4
ZNF217
ZNF331
ZNF521
ZNF572
ZNF610
ZNF790
ZNF804B
ZNF823

## Sheet: S1(B) Validation Variant Class
Supplementary Table S1(B) Validation rate by variant class
Variant_class	Attempted	Validated	Validated (%)
Intron	6807	5430	0.798
5'Flank	508	400	0.787
5'UTR	136	109	0.801
3'UTR	102	79	0.775
Translation_Start_Site	8	7	0.875
RNA	21	8	0.381
Silent	371	282	0.76
Missense_Mutation	1306	916	0.701
Nonsense_Mutation	142	107	0.754
Nonstop_Mutation	1	1	1
Frame_Shift_Del	51	50	0.98
Frame_Shift_Ins	35	31	0.886
In_Frame_Del	30	25	0.833
In_Frame_Ins	6	4	0.667
Splice_Site	44	33	0.75

## Sheet: S1(C) Validation Gene
Supplementary Table S1(C) Validation rate by gene
Gene	Variant_class	Attempted	Validated	Validated (%)
23 genes	Coding+noncoding	693	585	0.84
23 genes	Only coding	390	338	0.87
CUL3	Coding+noncoding	21	19	0.904762
CYLD	Coding+noncoding	14	14	1
DDR2	Coding+noncoding	15	13	0.866667
DDX3X	Coding+noncoding	5	5	1
FBXW7	Coding+noncoding	20	16	0.8
FGFR2	Coding+noncoding	7	4	0.571429
FLG	Coding+noncoding	38	36	0.947368
HRAS	Coding+noncoding	3	2	0.666667
KRAS	Coding+noncoding	4	4	1
MLL2	Coding+noncoding	31	21	0.677419
MLL3	Coding+noncoding	58	47	0.810345
NF1	Coding+noncoding	32	26	0.8125
NFE2L2	Coding+noncoding	22	22	1
NOTCH1	Coding+noncoding	4	2	0.5
NOTCH2	Coding+noncoding	57	45	0.789474
NRAS	Coding+noncoding	1	1	1
NSD1	Coding+noncoding	52	35	0.673077
PIK3CA	Coding+noncoding	57	46	0.807018
RB1	Coding+noncoding	18	14	0.777778
RIMS2	Coding+noncoding	23	22	0.956522
TP53	Coding+noncoding	169	169	1
TPRX1	Coding+noncoding	2	2	1
UBR5	Coding+noncoding	40	20	0.5

## Sheet: S1(D) CN gain HPV(-)
Supplementary Table S1(D) 75 Significant Copy Number Gain in HPV-
Gene	AMP.Gscore	AMP.pvalue	AMP.qvalue
ATRX	0.608116	0	0
CSMD3	0.595362	0	0
PKHD1L1	0.837971	0	0
RB1CC1	0.472029	0	0
RIMS2	0.47029	0	0
SI	0.772609	0	0
TFRC	0.466522	0	0
EPS8	0.433043	7.32747e-15	4.61631e-13
GMPS	0.43087	1.05471e-14	5.90639e-13
PIK3C2G	0.411014	2.52687e-13	1.27354e-11
BBS9	0.406957	4.7351e-13	2.16954e-11
UBR5	0.40029	1.30818e-12	5.49434e-11
NRK	0.375217	5.01992e-11	1.94618e-09
WRN	0.362754	2.77694e-10	9.997e-09
ABCA6	0.353188	9.85481e-10	3.31122e-08
REL	0.345652	2.59904e-09	8.18697e-08
PIK3CA	0.343623	3.36018e-09	9.96195e-08
ADAM18	0.334058	1.10087e-08	3.08244e-07
CCND1	0.326667	2.67991e-08	7.10882e-07
BRCA2	0.310435	1.73958e-07	4.38375e-06
LRRK2	0.30942	1.9479e-07	4.67495e-06
HOOK3	0.307101	2.51834e-07	5.76929e-06
BRCA1	0.299275	5.89014e-07	1.25623e-05
SMC6	0.29913	5.98206e-07	1.25623e-05
PIK3C2A	0.292754	1.17178e-06	2.36231e-05
MDM2	0.290435	1.48983e-06	2.88797e-05
TRRAP	0.287536	2.00484e-06	3.74238e-05
ARL13B	0.285652	2.4269e-06	4.36841e-05
ENPP2	0.276522	5.99428e-06	0.000104177
FAM179B	0.272174	9.1046e-06	0.000152957
LRP1B	0.267391	1.42846e-05	0.00023224
DNAH5	0.262899	2.16145e-05	0.000340428
CHEK2	0.254783	4.46875e-05	0.0006825
MLF1	0.251159	6.12448e-05	0.000907864
ABCA9	0.248261	7.84925e-05	0.00113029
APC	0.242319	0.000129089	0.00175351
PIK3C3	0.242029	0.000132209	0.00175351
TTN	0.242029	0.000132209	0.00175351
HBS1L	0.235362	0.000226767	0.00293052
WDR63	0.234493	0.000242963	0.00306134
NEK5	0.229855	0.000349137	0.00429183
DST	0.225797	0.000475929	0.00571114
JAK2	0.218986	0.000788199	0.00923843
ETV5	0.216667	0.000931742	0.0106727
NF1	0.212319	0.00126738	0.0141698
TRIP11	0.212029	0.00129328	0.0141698
LPP	0.209565	0.00153375	0.0161044
MED1	0.209855	0.00150348	0.0161044
PIK3CB	0.207681	0.00174443	0.0175839
RASA1	0.207826	0.00172733	0.0175839
PPP4R4	0.206232	0.00192405	0.0190142
SYNE2	0.203478	0.0023123	0.0224116
BIRC3	0.20087	0.0027442	0.0260957
NAV3	0.199275	0.00304272	0.0283988
BRIP1	0.197681	0.00337019	0.0308832
EP300	0.187246	0.00641255	0.057713
CYLD	0.181884	0.00877176	0.0775608
EGFR	0.18	0.00976532	0.0820165
PKD1L1	0.180435	0.0095277	0.0820165
ROS1	0.17971	0.0099266	0.0820165
SRPK2	0.179855	0.00984567	0.0820165
MSH3	0.175942	0.0122444	0.0995354
ABCA12	0.172319	0.0149015	0.115544
MECOM	0.172464	0.0147864	0.115544
MELK	0.172464	0.0147864	0.115544
BCL6	0.167971	0.018731	0.143037
DMC1	0.167536	0.0191564	0.144102
PCDH15	0.166087	0.0206342	0.152936
TC2N	0.165507	0.0212518	0.155231
MLLT10	0.163623	0.023368	0.168249
FAAH2	0.16058	0.0271597	0.192796
PTEN	0.159855	0.0281345	0.196942
KRAS	0.156377	0.0332276	0.226307
TDRD3	0.156522	0.0330012	0.226307
DNAH3	0.156087	0.0336843	0.226358

## Sheet: S1(E) CN loss HPV(-)
Supplementary Table S1(E) 30 Significant Copy Number Loss in HPV-
Gene	DEL.Gscore	DEL.pvalue	DEL.qvalue
MYH6	-0.585072	3.84927e-13	1.94003e-10
CHD5	-0.567391	2.26575e-12	5.70969e-10
THSD7A	-0.526232	1.11356e-10	1.87079e-08
CDKN2A	-0.461739	2.60105e-08	3.27733e-06
XPC	-0.372754	1.32449e-05	0.00133509
PTK2B	-0.360145	2.84084e-05	0.0023863
GNAS	-0.352464	4.45693e-05	0.00320899
UBR5	-0.331449	0.0001445	0.0091035
SUMF1	-0.319275	0.000275171	0.0154096
MST1R	-0.306812	0.000517311	0.0260725
BAP1	-0.295797	0.000882583	0.0404384
CDH16	-0.286087	0.00138782	0.055615
HERC2	-0.285362	0.00143451	0.055615
RB1	-0.251159	0.00614263	0.138122
ABR	-0.257246	0.00481502	0.138122
AKT1	-0.258261	0.00462055	0.138122
EPHA1	-0.255217	0.00522599	0.138122
FARP2	-0.24942	0.00657725	0.138122
FGFR1	-0.254203	0.00544295	0.138122
MLH1	-0.249565	0.00654002	0.138122
PIK3R1	-0.255072	0.0052565	0.138122
SETD2	-0.250725	0.00624883	0.138122
TLN2	-0.25058	0.00628459	0.138122
TSC2	-0.259275	0.00443312	0.138122
TRRAP	-0.242464	0.00859959	0.1704
NCOR1	-0.241884	0.00879049	0.1704
NRXN2	-0.24058	0.00923363	0.172361
PTK6	-0.234348	0.0116313	0.209363
TP53	-0.232029	0.0126524	0.219891
KDM5C	-0.230725	0.0132603	0.222773

## Sheet: S1(F) CN gain HPV(+)
Supplementary Table S1(F) 65 Significant Copy Number Gain in HPV+
Gene	AMP.Gscore	AMP.pvalue	AMP.qvalue
SI	0.415294	1.25455e-14	6.32294e-12
PIK3CA	0.378824	3.65352e-12	9.20688e-10
DNAH5	0.358627	6.57497e-11	1.1046e-08
PKHD1L1	0.345294	4.02029e-10	5.06556e-08
TFRC	0.336078	1.34322e-09	1.35396e-07
ADAM18	0.326275	4.65471e-09	3.90995e-07
GMPS	0.324314	5.93839e-09	4.27564e-07
BCL6	0.318235	1.25019e-08	7.8762e-07
PIK3C2G	0.312157	2.59022e-08	1.45052e-06
MLF1	0.308235	4.10919e-08	2.07103e-06
LRRK2	0.293725	2.1391e-07	9.80097e-06
ITK	0.280784	8.63002e-07	3.62461e-05
ATRX	0.277059	1.27236e-06	4.93282e-05
ETV5	0.27549	1.49562e-06	5.38425e-05
RB1CC1	0.274118	1.72141e-06	5.78393e-05
PIK3C2A	0.260588	6.5922e-06	0.000207654
PIK3CB	0.257059	9.23778e-06	0.000268451
TTN	0.256667	9.58754e-06	0.000268451
EPS8	0.25549	1.07141e-05	0.000284205
BRCA1	0.251569	1.54501e-05	0.000384488
HOOK3	0.251176	1.60204e-05	0.000384488
MECOM	0.249216	1.91846e-05	0.000439501
CSMD3	0.246667	2.4191e-05	0.000530098
SUMF1	0.237843	5.28432e-05	0.00110971
RIMS2	0.231373	9.17771e-05	0.00185023
WDR63	0.22902	0.000111689	0.00216505
RASA1	0.226667	0.000135604	0.00253128
HBS1L	0.22451	0.000161668	0.00291002
ARL13B	0.218431	0.000262557	0.00447933
TP63	0.218235	0.000266627	0.00447933
BLM	0.217255	0.000287876	0.00453405
KIAA1468	0.217451	0.000283504	0.00453405
MLLT10	0.214314	0.000361461	0.00528395
POLQ	0.214314	0.000361461	0.00528395
RNGTT	0.214118	0.000366941	0.00528395
LPP	0.213333	0.000389641	0.00545497
ASXL1	0.210588	0.000479759	0.00653509
WRN	0.21	0.000501427	0.0066505
PIK3C3	0.208627	0.000555556	0.00717949
MED1	0.207647	0.000597474	0.00752817
ADAMTSL1	0.197255	0.0012604	0.0154938
ABCA6	0.196863	0.00129528	0.0155433
CHEK2	0.18902	0.00220607	0.0258572
PKD1L1	0.187843	0.00238429	0.0273109
BRIP1	0.182745	0.00331671	0.0371471
FAM179B	0.179804	0.00399306	0.04375
RB1	0.17902	0.00419314	0.044028
REL	0.179216	0.0041423	0.044028
C1ORF173	0.176863	0.00479038	0.0492725
PCDH15	0.170588	0.00698126	0.0697901
TRIO	0.170392	0.0070621	0.0697901
MDM2	0.167647	0.00828362	0.0802874
AKT3	0.16549	0.00936985	0.0874519
FARP2	0.165686	0.0092662	0.0874519
MSH3	0.162941	0.0108125	0.0973126
NLRP12	0.162941	0.0108125	0.0973126
LRP1B	0.161176	0.0119212	0.105409
DST	0.160784	0.0121806	0.105845
CPNE4	0.158824	0.013552	0.115766
BRCA2	0.157451	0.0145895	0.122552
TRRAP	0.157059	0.0148982	0.123093
EPHA7	0.156078	0.0156947	0.126866
JAK2	0.155882	0.0158583	0.126866
PMS1	0.147059	0.0248924	0.196028
TRIP11	0.144118	0.0287325	0.222788

## Sheet: S1(G) CN loss HPV(+)
Supplementary Table S1(G) 22 Significant Copy Number Loss in HPV+
Gene	DEL.Gscore	DEL.pvalue	DEL.qvalue
SYNE2	-0.353529	3.32871e-07	0.000167767
ABR	-0.313333	8.02449e-06	0.00202217
MYH6	-0.303725	1.61468e-05	0.00271265
MYH13	-0.287255	5.06792e-05	0.00638558
ATM	-0.276471	0.000103237	0.00867189
SYNE1	-0.276667	0.000101937	0.00867189
TNFRSF14	-0.267843	0.000178574	0.0128574
RB1	-0.256275	0.000361512	0.018434
HYDIN	-0.256078	0.000365754	0.018434
TSC2	-0.257843	0.000329191	0.018434
CHD5	-0.234902	0.00121795	0.0558043
NUMA1	-0.231176	0.00148769	0.0624831
CSF1R	-0.215098	0.00339124	0.131476
CELSR3	-0.208235	0.00472798	0.141484
RARG	-0.209216	0.00451197	0.141484
RUFY1	-0.208039	0.00477228	0.141484
VWA5A	-0.208039	0.00477228	0.141484
PDE4DIP	-0.2	0.0069383	0.194272
EPHA2	-0.197255	0.00785569	0.208383
PIK3R1	-0.195686	0.00842648	0.212347
DST	-0.190784	0.0104513	0.23943
FGFR3	-0.191176	0.010275	0.23943

## Sheet: S1(H) CN Validation
Supplementary Table S1(H) Copy Number Validation
Gene	Attempted Gain	Validated Gain	Validated%
PIK3CA	15	14	0.93
TP63	4	4	1
EGFR	5	3	0.6
MYC	2	2	1
CCND1	5	5	1
KRAS	4	3	0.75
Gene	Attempted Loss	Validated Loss	Validated%
ATM	2	2	1
CDKN2A	7	5	0.71
RB1	5	4	0.8
MLH1	5	3	0.6
Total	54	45	0.83
