# Supplementary material for: Integrative and Comparative Genomic Analysis of HPV-Positive and HPV-Negative Head and Neck Squamous Cell Carcinomas
Source: Oxford University Press journal article supplement (doi:10.1158/1078-0432.ccr-13-3310), 2014-07-24
Supplement: 10780432ccr133310-sup-123900_2_supp_2466685_n5bq4c.xlsx [file 10780432ccr133310-sup-123900_2_supp_2466685_n5bq4c.xlsx]

## Sheet: S2(A) Summary
Supplementary Table S2(A) Summary for various comparisons
Contrast	HPV+		HPV-		HPV+ and HPV-
	OROPHARYNX	All Anatomic Site	OROPHARYNX	All Anatomic Site	OROPHARYNX	All Anatomic Site
Smokers vs. Non-smokers	ZFHX4 (17% vs 0%, p=0.042)	ZFHX4 (28% vs 3%, p=0.017)		CSMD3 (35% vs 14%, p=0.090)	TP53 (35% vs 14%, p=0.048)	TP53 (61% vs 30%, p=0.001)
	TRRAP (24% vs 3.3% p=0.050)	TRRAP (17% vs 0%, p=0.039)		FLG (17% vs 0%, p=0.095)	CSMD3 (29% vs 8%, p=0.052)	CSMD3 (30% vs 9%, p=0.006)
						RB1CC1 (11% vs 0%, p=0.016)
						THSD7A (9% vs 0%, p=0.032)
						C10rf173 (7.5% vs 0%, p=0.063)
						CDH9 (11% vs 2%, p=0.072)
Drinkers vs. Non-drinkers	SYNE1 (21% vs 0%, p=0.049)	SYNE1 (20% vs 3.8%, p=0.09)				TP53 (55% vs 35%, p=0.040)
						CDKN2A (15% vs 3.9%, p=0.071)
						SYNE1 (25% vs 10%, p=0.092)
Large primary vs. Small primary	FLG (23% vs 0%, p=0.026)	FLG (21% vs 0%, p=0.026)				TP53 (53% vs 31%, p=0.052)
	PIK3CA (35% vs 9%, p=0.081)	PIK3CA (32% vs 9%, p=0.084)

## Sheet: S2(B) Smokers vs. Non-smokers
Supplementary Table S2(B).1 Mutation event difference between smokers and non-smokers in all tumor samples
Gene Name	Mutation Event in Non-smoker+light-smoker	No Mutation Event in Non-smoker+light-smoker	Mutation Event in Heavy-smoker	No Mutation Event in Heavy-smoker	P Value
TP53	16	38	40	26	0.000913618
CSMD3	5	49	20	46	0.00616222
RB1CC1	0	54	7	59	0.0160687
THSD7A	0	54	6	60	0.0319447
C1orf173	0	54	5	61	0.0634881
CDH9	1	53	7	59	0.0720339
FLG	3	51	11	55	0.0856087
NRG2	3	51	0	66	0.0883208
STAT1	3	51	0	66	0.0883208
EP300	5	49	1	65	0.0890869
CUL3	0	54	4	62	0.126236
FAM135B	0	54	4	62	0.126236
GRM8	0	54	4	62	0.126236
ROS1	0	54	4	62	0.126236
COL11A1	1	53	6	60	0.127201
NSD1	1	53	6	60	0.127201
SYNE1	6	48	15	51	0.146369
TTN	14	40	26	40	0.172705
PEG3	4	50	1	65	0.173011
FGFR2	2	52	0	66	0.20042
JAK2	2	52	0	66	0.20042
NRK	2	52	0	66	0.20042
NUP214	2	52	0	66	0.20042
PCDHA8	2	52	0	66	0.20042
PIK3CB	2	52	0	66	0.20042
WRN	2	52	0	66	0.20042
YTHDC1	2	52	0	66	0.20042
APOB	1	53	5	61	0.221205
LRP1B	3	51	9	57	0.221397
ZNF804B	5	49	2	64	0.241234
DSPP	0	54	3	63	0.251261
EPHA3	0	54	3	63	0.251261
HDX	0	54	3	63	0.251261
KDR	0	54	3	63	0.251261
PHLPP1	0	54	3	63	0.251261
PLEC	0	54	3	63	0.251261
PMS1	0	54	3	63	0.251261
RGAG1	0	54	3	63	0.251261
SPAG17	0	54	3	63	0.251261
TET2	0	54	3	63	0.251261
TRRAP	0	54	3	63	0.251261
TSC1	0	54	3	63	0.251261
ZFHX4	5	49	11	55	0.287406
BRCA2	3	51	1	65	0.325523
DDX3X	3	51	1	65	0.325523
HRAS	3	51	1	65	0.325523
INPP4B	3	51	1	65	0.325523
MUC2	3	51	1	65	0.325523
PAK7	3	51	1	65	0.325523
PLCB1	3	51	1	65	0.325523
RB1	3	51	1	65	0.325523
NAV3	1	53	4	62	0.377225
RELN	1	53	4	62	0.377225
USH2A	4	50	9	57	0.379254
ZNF521	4	50	2	64	0.406917
ABHD13	1	53	0	66	0.45
ACACB	1	53	0	66	0.45
ADAMTSL1	1	53	0	66	0.45
AKT1	1	53	0	66	0.45
AKT3	1	53	0	66	0.45
ANKRD17	1	53	0	66	0.45
ATM	1	53	0	66	0.45
BCL9	1	53	0	66	0.45
BIRC3	1	53	0	66	0.45
BRCA1	1	53	0	66	0.45
BRD4	1	53	0	66	0.45
CABIN1	1	53	0	66	0.45
CBL	1	53	0	66	0.45
CDH1	1	53	0	66	0.45
CHD5	1	53	0	66	0.45
CLCN4	1	53	0	66	0.45
CLSTN2	1	53	0	66	0.45
CTNNB1	1	53	0	66	0.45
CYP26A1	1	53	0	66	0.45
DPYS	1	53	0	66	0.45
DUSP5	1	53	0	66	0.45
EPHB3	1	53	0	66	0.45
ERAS	1	53	0	66	0.45
ERBB3	1	53	0	66	0.45
ETV6	1	53	0	66	0.45
FAM5B	1	53	0	66	0.45
FANCG	1	53	0	66	0.45
FANCM	1	53	0	66	0.45
FARP2	1	53	0	66	0.45
FGFR4	1	53	0	66	0.45
GABRB3	1	53	0	66	0.45
GC	1	53	0	66	0.45
HLA-A	1	53	0	66	0.45
HLA-B	1	53	0	66	0.45
INO80	1	53	0	66	0.45
INPP5D	1	53	0	66	0.45
INTS3	1	53	0	66	0.45
KRT10	1	53	0	66	0.45
KRTAP4-3	1	53	0	66	0.45
LAMB1	1	53	0	66	0.45
LILRA5	1	53	0	66	0.45
LOC200030	1	53	0	66	0.45
LRRTM3	1	53	0	66	0.45
MAP3K1	1	53	0	66	0.45
MCOLN2	1	53	0	66	0.45
MKL1	1	53	0	66	0.45
MLF1	1	53	0	66	0.45
MMP16	1	53	0	66	0.45
MX2	1	53	0	66	0.45
MYH6	1	53	0	66	0.45
MYH7	1	53	0	66	0.45
NBPF3	1	53	0	66	0.45
NCOA3	1	53	0	66	0.45
NKAP	1	53	0	66	0.45
NONO	1	53	0	66	0.45
OR8H2	1	53	0	66	0.45
PCDH17	1	53	0	66	0.45
PCDHA13	1	53	0	66	0.45
PCDHA2	1	53	0	66	0.45
PHKB	1	53	0	66	0.45
PIK3C2A	1	53	0	66	0.45
PIK3R1	1	53	0	66	0.45
PIK3R2	1	53	0	66	0.45
PLXNA1	1	53	0	66	0.45
PPP1R9A	1	53	0	66	0.45
PROKR2	1	53	0	66	0.45
PRR21	1	53	0	66	0.45
RBM15	1	53	0	66	0.45
RECQL4	1	53	0	66	0.45
RUFY1	1	53	0	66	0.45
RUNX1	1	53	0	66	0.45
SBDS	1	53	0	66	0.45
SFMBT2	1	53	0	66	0.45
SMAD1	1	53	0	66	0.45
SPTBN4	1	53	0	66	0.45
TDRD3	1	53	0	66	0.45
TNFAIP3	1	53	0	66	0.45
TPM3	1	53	0	66	0.45
USP6	1	53	0	66	0.45
WT1	1	53	0	66	0.45
XPC	1	53	0	66	0.45
ZNF426	1	53	0	66	0.45
ZNF433	1	53	0	66	0.45
ZNF439	1	53	0	66	0.45
ZNF440	1	53	0	66	0.45
ZNF443	1	53	0	66	0.45
ZNF461	1	53	0	66	0.45
ZNF501	1	53	0	66	0.45
ZNF665	1	53	0	66	0.45
ZNF699	1	53	0	66	0.45
ZNF761	1	53	0	66	0.45
ZNF83	1	53	0	66	0.45
CDH12	2	52	5	61	0.456216
MTOR	2	52	5	61	0.456216
ABCA4	0	54	2	64	0.50084
ABCA6	0	54	2	64	0.50084
ARHGAP30	0	54	2	64	0.50084
ARID1A	0	54	2	64	0.50084
BAGE2	0	54	2	64	0.50084
BLM	0	54	2	64	0.50084
BRIP1	0	54	2	64	0.50084
BTBD12	0	54	2	64	0.50084
COQ3	0	54	2	64	0.50084
DST	0	54	2	64	0.50084
EFCAB6	0	54	2	64	0.50084
EGFR	0	54	2	64	0.50084
FLG2	0	54	2	64	0.50084
IRF6	0	54	2	64	0.50084
KIAA2022	0	54	2	64	0.50084
LRRTM1	0	54	2	64	0.50084
MED1	0	54	2	64	0.50084
MYH11	0	54	2	64	0.50084
NLRP11	0	54	2	64	0.50084
NLRP4	0	54	2	64	0.50084
NRAP	0	54	2	64	0.50084
NRXN3	0	54	2	64	0.50084
NUMA1	0	54	2	64	0.50084
SLC2A13	0	54	2	64	0.50084
SLITRK3	0	54	2	64	0.50084
TRIO	0	54	2	64	0.50084
VWA5A	0	54	2	64	0.50084
WBSCR17	0	54	2	64	0.50084
ZEB2	0	54	2	64	0.50084
ZNF790	0	54	2	64	0.50084
DNAH5	3	51	6	60	0.511734
PKHD1L1	4	50	8	58	0.543809
ASXL1	2	52	1	65	0.587559
CASP8	2	52	1	65	0.587559
GAS7	2	52	1	65	0.587559
HYDIN	2	52	1	65	0.587559
MYH1	2	52	1	65	0.587559
NCOR1	2	52	1	65	0.587559
NKAPL	2	52	1	65	0.587559
REST	2	52	1	65	0.587559
SLC26A3	2	52	1	65	0.587559
TFRC	2	52	1	65	0.587559
MLL2	6	48	10	56	0.596341
DSCAM	1	53	3	63	0.626335
EPHA7	1	53	3	63	0.626335
FAT4	1	53	3	63	0.626335
KEAP1	1	53	3	63	0.626335
KIAA1549	1	53	3	63	0.626335
LRFN5	1	53	3	63	0.626335
ODZ1	1	53	3	63	0.626335
PKD1L1	1	53	3	63	0.626335
UNC5D	1	53	3	63	0.626335
DNAH3	3	51	2	64	0.6564
PDE3A	3	51	2	64	0.6564
PIK3C2G	3	51	2	64	0.6564
FBXW7	2	52	4	62	0.689266
PDE4DIP	2	52	4	62	0.689266
AHNAK	3	51	5	61	0.728741
MLL3	3	51	5	61	0.728741
PCLO	3	51	5	61	0.728741
CDKN2A	5	49	8	58	0.770354
NOTCH1	6	48	9	57	0.784973
ABAT	1	53	1	65	1
ABCA9	1	53	1	65	1
ABL2	1	53	1	65	1
APC	1	53	1	65	1
ASH1L	3	51	3	63	1
CARD11	1	53	1	65	1
CDH10	1	53	1	65	1
CDH11	1	53	1	65	1
CREBBP	1	53	1	65	1
CRIPAK	1	53	1	65	1
CUBN	3	51	3	63	1
DOK6	1	53	1	65	1
E2F7	1	53	1	65	1
EBF1	1	53	1	65	1
FANCA	1	53	1	65	1
FANCD2	1	53	1	65	1
FLT3	1	53	1	65	1
FSTL5	1	53	1	65	1
GPR174	1	53	1	65	1
KCTD8	1	53	1	65	1
KIAA1468	1	53	1	65	1
MEF2C	1	53	1	65	1
MYH2	1	53	1	65	1
MYH4	1	53	1	65	1
MYH8	3	51	3	63	1
MYH9	1	53	1	65	1
NBPF1	1	53	1	65	1
PKP4	1	53	1	65	1
PPP4R4	1	53	1	65	1
PRDM9	1	53	1	65	1
PRKCA	1	53	1	65	1
PZP	1	53	1	65	1
RIMS2	1	53	1	65	1
RXFP3	1	53	1	65	1
SETBP1	1	53	1	65	1
SFRS14	1	53	1	65	1
SLCO5A1	1	53	1	65	1
SRPK2	1	53	1	65	1
TAP2	1	53	1	65	1
TEX15	1	53	1	65	1
TPRX1	3	51	3	63	1
TRAF3	1	53	1	65	1
USP26	1	53	1	65	1
VPS41	1	53	1	65	1
WDR63	1	53	1	65	1
XRCC6	1	53	1	65	1
ZNF799	1	53	1	65	1
ABCA12	1	53	2	64	1
ABCD2	2	52	2	64	1
ADAMTS12	4	50	4	62	1
ADCY1	0	54	1	65	1
AIM1	0	54	1	65	1
AKAP1	0	54	1	65	1
AMD1	0	54	1	65	1
ANKHD1-EIF4EBP3	0	54	1	65	1
ANO4	0	54	1	65	1
ARFGEF2	0	54	1	65	1
ATXN1	0	54	1	65	1
B2M	0	54	1	65	1
BAZ1B	0	54	1	65	1
BBS9	0	54	1	65	1
BBX	2	52	2	64	1
BZRAP1	0	54	1	65	1
CCNA1	0	54	1	65	1
CCR2	0	54	1	65	1
CCR5	0	54	1	65	1
CD248	0	54	1	65	1
CD8A	0	54	1	65	1
CELSR3	1	53	2	64	1
CNGA3	0	54	1	65	1
CNTN6	2	52	3	63	1
CNTNAP2	2	52	3	63	1
COL22A1	0	54	1	65	1
COL6A3	2	52	2	64	1
CTNND2	1	53	2	64	1
CYLD	2	52	2	64	1
DCC	0	54	1	65	1
DCT	0	54	1	65	1
DDR2	2	52	3	63	1
DGKG	0	54	1	65	1
DICER1	1	53	2	64	1
DSEL	2	52	2	64	1
DYRK1B	0	54	1	65	1
E2F3	0	54	1	65	1
ENPP2	0	54	1	65	1
EP400	0	54	1	65	1
EPHA1	0	54	1	65	1
EPHA2	2	52	2	64	1
EPHB1	0	54	1	65	1
EPM2AIP1	0	54	1	65	1
EPS8	0	54	1	65	1
ERBB4	1	53	2	64	1
ETV5	0	54	1	65	1
EWSR1	0	54	1	65	1
EZH2	1	53	2	64	1
FAM179B	2	52	2	64	1
FAT1	7	47	8	58	1
FAT2	3	51	4	62	1
FGFR1	0	54	1	65	1
FGFR3	3	51	4	62	1
FOXP1	0	54	1	65	1
GMPS	0	54	1	65	1
GNAQ	0	54	1	65	1
GPC5	1	53	2	64	1
HBS1L	0	54	0	66	1
HERC2	0	54	1	65	1
HSCB	0	54	1	65	1
HUWE1	4	50	6	60	1
IL6ST	0	54	1	65	1
INCENP	0	54	1	65	1
INPP4A	2	52	2	64	1
ITK	0	54	1	65	1
JAK1	0	54	1	65	1
KDM5A	0	54	1	65	1
KIT	0	54	1	65	1
KRAS	2	52	2	64	1
KRTAP6-3	0	54	1	65	1
LILRA3	0	54	1	65	1
LILRB1	0	54	1	65	1
LILRB2	0	54	1	65	1
LOC642587	0	54	1	65	1
LRRC37B	0	54	1	65	1
LRRK2	0	54	1	65	1
LTBP1	0	54	1	65	1
MACF1	2	52	3	63	1
MAML3	2	52	2	64	1
MAP2	2	52	3	63	1
MDM2	0	54	1	65	1
MECOM	0	54	1	65	1
MLLT10	0	54	1	65	1
MST1R	0	54	1	65	1
MTA2	0	54	1	65	1
MUC21	0	54	1	65	1
MYC	0	54	1	65	1
MYH13	2	52	2	64	1
MYH7B	0	54	1	65	1
NACA2	0	54	1	65	1
NECAB1	0	54	1	65	1
NELL2	0	54	1	65	1
NF1	2	52	3	63	1
NF2	0	54	1	65	1
NFATC3	0	54	1	65	1
NFE2L2	1	53	2	64	1
NLRP12	0	54	1	65	1
NOTCH2	2	52	3	63	1
NOTCH3	2	52	2	64	1
NRAS	0	54	1	65	1
NTRK3	0	54	1	65	1
OR4C15	0	54	1	65	1
OR51S1	0	54	1	65	1
OR5L2	0	54	1	65	1
OR8H1	0	54	1	65	1
OR8K1	0	54	1	65	1
PALB2	0	54	1	65	1
PARK2	0	54	1	65	1
PBRM1	1	53	2	64	1
PCDH15	4	50	4	62	1
PCDHA1	0	54	1	65	1
PCDHA12	0	54	1	65	1
PCDHA6	0	54	1	65	1
PCDHAC2	0	54	1	65	1
PCDHB11	1	53	2	64	1
PCDHB12	0	54	1	65	1
PCDHB4	0	54	1	65	1
PCM1	0	54	1	65	1
PDGFRA	0	54	1	65	1
PHIP	0	54	1	65	1
PHKA2	0	54	1	65	1
PHLPP2	0	54	1	65	1
PIK3C2B	0	54	1	65	1
PIK3C3	1	53	2	64	1
PIK3CA	9	45	10	56	1
PIK3CG	2	52	3	63	1
PKHD1	2	52	2	64	1
PLAG1	0	54	1	65	1
PLIN5	0	54	1	65	1
PMS2	0	54	1	65	1
POLQ	2	52	3	63	1
PRDM11	0	54	1	65	1
PRDM7	0	54	1	65	1
PTEN	0	54	1	65	1
PTK6	0	54	0	66	1
PTPRF	1	53	2	64	1
RAD51L1	0	54	1	65	1
RANBP17	0	54	1	65	1
RARG	0	54	1	65	1
RASA1	1	53	2	64	1
RIMBP2	0	54	1	65	1
RIPK4	2	52	2	64	1
SALL1	0	54	1	65	1
SETD2	0	54	1	65	1
SI	4	50	6	60	1
SMAD4	0	54	1	65	1
SMARCA4	0	54	1	65	1
SMC6	0	54	1	65	1
SMO	0	54	1	65	1
SPTA1	4	50	4	62	1
SPTLC2	0	54	1	65	1
SRGAP3	0	54	1	65	1
STAT3	0	54	1	65	1
STYK1	0	54	1	65	1
SYNE2	4	50	6	60	1
TGFBR2	1	53	2	64	1
TMEM132D	2	52	2	64	1
TP63	1	53	2	64	1
TPP2	1	53	2	64	1
TRIP11	0	54	1	65	1
TSC2	0	54	1	65	1
UBE3A	0	54	1	65	1
UBE4A	0	54	1	65	1
UBR5	4	50	4	62	1
WHSC1	0	54	1	65	1
WHSC1L1	0	54	1	65	1
ZNF180	0	54	1	65	1
ZNF19	0	54	1	65	1
ZNF217	0	54	1	65	1
ZNF534	0	54	1	65	1
ZNF571	0	54	1	65	1
ZNF823	0	54	1	65	1
Supplementary Table S2(B).2 Mutation event difference between smokers and non-smokers in all oropharynx tumor samples
Gene Name	Mutation Event in Non-smoker+light-smoker	No Mutation Event in Non-smoker+light-smoker	Mutation Event in Heavy-smoker	No Mutation Event in Heavy-smoker	P Value
TP53	5	31	11	20	0.0482444
CSMD3	3	33	9	22	0.0522177
EP300	5	31	0	31	0.056629
PHLPP1	0	36	3	28	0.0938315
RB1CC1	0	36	3	28	0.0938315
SPAG17	0	36	3	28	0.0938315
THSD7A	0	36	3	28	0.0938315
TRRAP	0	36	3	28	0.0938315
COL11A1	1	35	4	27	0.173918
BRIP1	0	36	2	29	0.210312
BTBD12	0	36	2	29	0.210312
DSPP	0	36	2	29	0.210312
EFCAB6	0	36	2	29	0.210312
GRM8	0	36	2	29	0.210312
NLRP11	0	36	2	29	0.210312
PLEC	0	36	2	29	0.210312
PMS1	0	36	2	29	0.210312
RGAG1	0	36	2	29	0.210312
TSC1	0	36	2	29	0.210312
ZFHX4	2	34	5	26	0.235623
PEG3	3	33	0	31	0.242877
STAT1	3	33	0	31	0.242877
FLG	3	33	6	25	0.283732
CDH9	1	35	3	28	0.329024
LRP1B	1	35	3	28	0.329024
MTOR	1	35	3	28	0.329024
FGFR3	2	34	4	27	0.403931
SYNE1	3	33	5	26	0.456021
ABCA9	0	36	1	30	0.462687
ANO4	0	36	1	30	0.462687
ARHGAP30	0	36	1	30	0.462687
ARID1A	0	36	1	30	0.462687
ATXN1	0	36	1	30	0.462687
B2M	0	36	1	30	0.462687
BAGE2	0	36	1	30	0.462687
BAZ1B	0	36	1	30	0.462687
BLM	0	36	1	30	0.462687
C1orf173	0	36	1	30	0.462687
CCR5	0	36	1	30	0.462687
CD8A	0	36	1	30	0.462687
COQ3	0	36	1	30	0.462687
CUL3	0	36	1	30	0.462687
DCT	0	36	1	30	0.462687
DST	0	36	1	30	0.462687
EGFR	0	36	1	30	0.462687
EP400	0	36	1	30	0.462687
EPHA1	0	36	1	30	0.462687
EPHB1	0	36	1	30	0.462687
EPM2AIP1	0	36	1	30	0.462687
ERBB4	0	36	1	30	0.462687
EWSR1	0	36	1	30	0.462687
FAM135B	0	36	1	30	0.462687
FANCA	0	36	1	30	0.462687
FAT4	0	36	1	30	0.462687
FLG2	0	36	1	30	0.462687
FLT3	0	36	1	30	0.462687
GMPS	0	36	1	30	0.462687
HSCB	0	36	1	30	0.462687
INCENP	0	36	1	30	0.462687
IRF6	0	36	1	30	0.462687
KDM5A	0	36	1	30	0.462687
KIAA1549	0	36	1	30	0.462687
KIAA2022	0	36	1	30	0.462687
KRTAP6-3	0	36	1	30	0.462687
LILRA3	0	36	1	30	0.462687
LILRB1	0	36	1	30	0.462687
LILRB2	0	36	1	30	0.462687
LOC642587	0	36	1	30	0.462687
LRRC37B	0	36	1	30	0.462687
LRRTM1	0	36	1	30	0.462687
MDM2	0	36	1	30	0.462687
MED1	0	36	1	30	0.462687
MLLT10	0	36	1	30	0.462687
MTA2	0	36	1	30	0.462687
MYC	0	36	1	30	0.462687
MYH7B	0	36	1	30	0.462687
NAV3	0	36	1	30	0.462687
NBPF1	0	36	1	30	0.462687
NECAB1	0	36	1	30	0.462687
NOTCH2	0	36	1	30	0.462687
NRAS	0	36	1	30	0.462687
NRXN3	0	36	1	30	0.462687
NUMA1	0	36	1	30	0.462687
OR8H1	0	36	1	30	0.462687
PALB2	0	36	1	30	0.462687
PARK2	0	36	1	30	0.462687
PCDHA1	0	36	1	30	0.462687
PCDHA12	0	36	1	30	0.462687
PCDHB4	0	36	1	30	0.462687
PCM1	0	36	1	30	0.462687
PDGFRA	0	36	1	30	0.462687
PHIP	0	36	1	30	0.462687
PHKA2	0	36	1	30	0.462687
PLIN5	0	36	1	30	0.462687
PMS2	0	36	1	30	0.462687
RAD51L1	0	36	1	30	0.462687
RARG	0	36	1	30	0.462687
ROS1	0	36	1	30	0.462687
SETD2	0	36	1	30	0.462687
SFRS14	0	36	1	30	0.462687
SLITRK3	0	36	1	30	0.462687
SRGAP3	0	36	1	30	0.462687
SRPK2	0	36	1	30	0.462687
TET2	0	36	1	30	0.462687
TRAF3	0	36	1	30	0.462687
TRIO	0	36	1	30	0.462687
TRIP11	0	36	1	30	0.462687
TSC2	0	36	1	30	0.462687
UNC5D	0	36	1	30	0.462687
VPS41	0	36	1	30	0.462687
WBSCR17	0	36	1	30	0.462687
ZNF217	0	36	1	30	0.462687
ZNF790	0	36	1	30	0.462687
ASXL1	2	34	0	31	0.495251
DSEL	2	34	0	31	0.495251
FGFR2	2	34	0	31	0.495251
HRAS	2	34	0	31	0.495251
HYDIN	2	34	0	31	0.495251
NKAPL	2	34	0	31	0.495251
NRG2	2	34	0	31	0.495251
NRK	2	34	0	31	0.495251
NUP214	2	34	0	31	0.495251
PCDHA8	2	34	0	31	0.495251
SLC26A3	2	34	0	31	0.495251
CTNND2	1	35	2	29	0.592318
EPHA7	1	35	2	29	0.592318
FAT2	1	35	2	29	0.592318
GPC5	1	35	2	29	0.592318
MAML3	1	35	2	29	0.592318
NFE2L2	1	35	2	29	0.592318
PKD1L1	1	35	2	29	0.592318
POLQ	1	35	2	29	0.592318
TTN	11	25	12	19	0.607183
ADAMTS12	3	33	1	30	0.617798
BRCA2	3	33	1	30	0.617798
DNAH3	3	33	1	30	0.617798
MYH8	3	33	1	30	0.617798
PAK7	3	33	1	30	0.617798
PCLO	3	33	1	30	0.617798
ASH1L	2	34	3	28	0.656221
SI	2	34	3	28	0.656221
SYNE2	4	32	2	29	0.6784
HUWE1	3	33	4	27	0.695534
PIK3CA	7	29	7	24	0.772333
ABAT	1	35	1	30	1
ABCA12	0	36	0	31	1
ABCA4	0	36	0	31	1
ABCA6	0	36	0	31	1
ABCD2	2	34	2	29	1
ABHD13	1	35	0	31	1
ABL2	1	35	0	31	1
ACACB	1	35	0	31	1
ADAMTSL1	1	35	0	31	1
ADCY1	0	36	0	31	1
AHNAK	2	34	2	29	1
AIM1	0	36	0	31	1
AKAP1	0	36	0	31	1
AKT1	0	36	0	31	1
AKT3	0	36	0	31	1
AMD1	0	36	0	31	1
ANKHD1-EIF4EBP3	0	36	0	31	1
ANKRD17	1	35	0	31	1
APC	0	36	0	31	1
APOB	1	35	1	30	1
ARFGEF2	0	36	0	31	1
ATM	0	36	0	31	1
BBS9	0	36	0	31	1
BBX	2	34	1	30	1
BCL9	1	35	0	31	1
BIRC3	1	35	0	31	1
BRCA1	0	36	0	31	1
BRD4	0	36	0	31	1
BZRAP1	0	36	0	31	1
CABIN1	1	35	0	31	1
CARD11	1	35	0	31	1
CASP8	1	35	0	31	1
CBL	1	35	0	31	1
CCNA1	0	36	0	31	1
CCR2	0	36	0	31	1
CD248	0	36	0	31	1
CDH1	1	35	0	31	1
CDH10	1	35	0	31	1
CDH11	1	35	0	31	1
CDH12	2	34	1	30	1
CDKN2A	2	34	2	29	1
CELSR3	0	36	0	31	1
CHD5	1	35	0	31	1
CLCN4	1	35	0	31	1
CLSTN2	1	35	0	31	1
CNGA3	0	36	0	31	1
CNTN6	2	34	1	30	1
CNTNAP2	1	35	0	31	1
COL22A1	0	36	0	31	1
COL6A3	1	35	1	30	1
CREBBP	1	35	0	31	1
CRIPAK	1	35	1	30	1
CTNNB1	0	36	0	31	1
CUBN	2	34	2	29	1
CYLD	2	34	1	30	1
CYP26A1	1	35	0	31	1
DCC	0	36	0	31	1
DDR2	1	35	1	30	1
DDX3X	2	34	1	30	1
DGKG	0	36	0	31	1
DICER1	1	35	1	30	1
DNAH5	2	34	1	30	1
DOK6	1	35	0	31	1
DPYS	0	36	0	31	1
DSCAM	1	35	1	30	1
DUSP5	1	35	0	31	1
DYRK1B	0	36	0	31	1
E2F3	0	36	0	31	1
E2F7	1	35	0	31	1
EBF1	1	35	0	31	1
ENPP2	0	36	0	31	1
EPHA2	1	35	1	30	1
EPHA3	0	36	0	31	1
EPHB3	1	35	0	31	1
EPS8	0	36	0	31	1
ERAS	1	35	0	31	1
ERBB3	1	35	0	31	1
ETV5	0	36	0	31	1
ETV6	1	35	0	31	1
EZH2	1	35	1	30	1
FAM179B	1	35	0	31	1
FAM5B	0	36	0	31	1
FANCD2	1	35	1	30	1
FANCG	1	35	0	31	1
FANCM	0	36	0	31	1
FARP2	1	35	0	31	1
FAT1	4	32	4	27	1
FBXW7	2	34	1	30	1
FGFR1	0	36	0	31	1
FGFR4	1	35	0	31	1
FOXP1	0	36	0	31	1
FSTL5	1	35	0	31	1
GABRB3	0	36	0	31	1
GAS7	1	35	1	30	1
GC	0	36	0	31	1
GNAQ	0	36	0	31	1
GPR174	1	35	0	31	1
HBS1L	0	36	0	31	1
HDX	0	36	0	31	1
HERC2	0	36	0	31	1
HLA-A	1	35	0	31	1
HLA-B	0	36	0	31	1
IL6ST	0	36	0	31	1
INO80	1	35	0	31	1
INPP4A	2	34	1	30	1
INPP4B	1	35	0	31	1
INPP5D	1	35	0	31	1
INTS3	0	36	0	31	1
ITK	0	36	0	31	1
JAK1	0	36	0	31	1
JAK2	1	35	0	31	1
KCTD8	1	35	0	31	1
KDR	0	36	0	31	1
KEAP1	0	36	0	31	1
KIAA1468	1	35	0	31	1
KIT	0	36	0	31	1
KRAS	2	34	2	29	1
KRT10	0	36	0	31	1
KRTAP4-3	1	35	0	31	1
LAMB1	1	35	0	31	1
LILRA5	1	35	0	31	1
LOC200030	1	35	0	31	1
LRFN5	1	35	1	30	1
LRRK2	0	36	0	31	1
LRRTM3	0	36	0	31	1
LTBP1	0	36	0	31	1
MACF1	1	35	1	30	1
MAP2	1	35	0	31	1
MAP3K1	0	36	0	31	1
MCOLN2	1	35	0	31	1
MECOM	0	36	0	31	1
MEF2C	1	35	0	31	1
MKL1	1	35	0	31	1
MLF1	0	36	0	31	1
MLL2	5	31	5	26	1
MLL3	2	34	1	30	1
MMP16	1	35	0	31	1
MST1R	0	36	0	31	1
MUC2	2	34	1	30	1
MUC21	0	36	0	31	1
MX2	1	35	0	31	1
MYH1	1	35	0	31	1
MYH11	0	36	0	31	1
MYH13	1	35	0	31	1
MYH2	1	35	1	30	1
MYH4	1	35	0	31	1
MYH6	1	35	0	31	1
MYH7	1	35	0	31	1
MYH9	1	35	0	31	1
NACA2	0	36	0	31	1
NBPF3	1	35	0	31	1
NCOA3	0	36	0	31	1
NCOR1	1	35	0	31	1
NELL2	0	36	0	31	1
NF1	2	34	1	30	1
NF2	0	36	0	31	1
NFATC3	0	36	0	31	1
NKAP	1	35	0	31	1
NLRP12	0	36	0	31	1
NLRP4	0	36	0	31	1
NONO	1	35	0	31	1
NOTCH1	4	32	4	27	1
NOTCH3	1	35	1	30	1
NRAP	0	36	0	31	1
NSD1	1	35	0	31	1
NTRK3	0	36	0	31	1
ODZ1	1	35	0	31	1
OR4C15	0	36	0	31	1
OR51S1	0	36	0	31	1
OR5L2	0	36	0	31	1
OR8H2	0	36	0	31	1
OR8K1	0	36	0	31	1
PBRM1	1	35	1	30	1
PCDH15	2	34	2	29	1
PCDH17	1	35	0	31	1
PCDHA13	1	35	0	31	1
PCDHA2	0	36	0	31	1
PCDHA6	0	36	0	31	1
PCDHAC2	0	36	0	31	1
PCDHB11	1	35	0	31	1
PCDHB12	0	36	0	31	1
PDE3A	1	35	1	30	1
PDE4DIP	2	34	2	29	1
PHKB	0	36	0	31	1
PHLPP2	0	36	0	31	1
PIK3C2A	1	35	0	31	1
PIK3C2B	0	36	0	31	1
PIK3C2G	1	35	0	31	1
PIK3C3	1	35	1	30	1
PIK3CB	1	35	0	31	1
PIK3CG	1	35	0	31	1
PIK3R1	0	36	0	31	1
PIK3R2	1	35	0	31	1
PKHD1	1	35	1	30	1
PKHD1L1	2	34	1	30	1
PKP4	1	35	0	31	1
PLAG1	0	36	0	31	1
PLCB1	2	34	1	30	1
PLXNA1	0	36	0	31	1
PPP1R9A	1	35	0	31	1
PPP4R4	1	35	0	31	1
PRDM11	0	36	0	31	1
PRDM7	0	36	0	31	1
PRDM9	0	36	0	31	1
PRKCA	1	35	1	30	1
PROKR2	0	36	0	31	1
PRR21	1	35	0	31	1
PTEN	0	36	0	31	1
PTK6	0	36	0	31	1
PTPRF	1	35	1	30	1
PZP	0	36	0	31	1
RANBP17	0	36	0	31	1
RASA1	1	35	0	31	1
RB1	2	34	1	30	1
RBM15	1	35	0	31	1
RECQL4	1	35	0	31	1
RELN	0	36	0	31	1
REST	2	34	1	30	1
RIMBP2	0	36	0	31	1
RIMS2	1	35	0	31	1
RIPK4	1	35	1	30	1
RUFY1	1	35	0	31	1
RUNX1	1	35	0	31	1
RXFP3	1	35	1	30	1
SALL1	0	36	0	31	1
SBDS	1	35	0	31	1
SETBP1	0	36	0	31	1
SFMBT2	0	36	0	31	1
SLC2A13	0	36	0	31	1
SLCO5A1	0	36	0	31	1
SMAD1	1	35	0	31	1
SMAD4	0	36	0	31	1
SMARCA4	0	36	0	31	1
SMC6	0	36	0	31	1
SMO	0	36	0	31	1
SPTA1	2	34	1	30	1
SPTBN4	1	35	0	31	1
SPTLC2	0	36	0	31	1
STAT3	0	36	0	31	1
STYK1	0	36	0	31	1
TAP2	1	35	1	30	1
TDRD3	1	35	0	31	1
TEX15	1	35	1	30	1
TFRC	2	34	1	30	1
TGFBR2	1	35	1	30	1
TMEM132D	1	35	0	31	1
TNFAIP3	1	35	0	31	1
TP63	1	35	1	30	1
TPM3	0	36	0	31	1
TPP2	1	35	1	30	1
TPRX1	2	34	2	29	1
UBE3A	0	36	0	31	1
UBE4A	0	36	0	31	1
UBR5	4	32	4	27	1
USH2A	3	33	2	29	1
USP26	1	35	0	31	1
USP6	1	35	0	31	1
VWA5A	0	36	0	31	1
WDR63	0	36	0	31	1
WHSC1	0	36	0	31	1
WHSC1L1	0	36	0	31	1
WRN	1	35	0	31	1
WT1	1	35	0	31	1
XPC	0	36	0	31	1
XRCC6	1	35	0	31	1
YTHDC1	1	35	0	31	1
ZEB2	0	36	0	31	1
ZNF180	0	36	0	31	1
ZNF19	0	36	0	31	1
ZNF426	1	35	0	31	1
ZNF433	0	36	0	31	1
ZNF439	1	35	0	31	1
ZNF440	0	36	0	31	1
ZNF443	0	36	0	31	1
ZNF461	1	35	0	31	1
ZNF501	1	35	0	31	1
ZNF521	2	34	2	29	1
ZNF534	0	36	0	31	1
ZNF571	0	36	0	31	1
ZNF665	1	35	0	31	1
ZNF699	1	35	0	31	1
ZNF761	0	36	0	31	1
ZNF799	1	35	0	31	1
ZNF804B	2	34	1	30	1
ZNF823	0	36	0	31	1
ZNF83	1	35	0	31	1
Supplementary Table S2(B).3 Mutation event difference between smokers and non-smokers in HPV+ tumor samples
Gene Name	Mutation Event in Non-smoker+light-smoker	No Mutation Event in Non-smoker+light-smoker	Mutation Event in Heavy-smoker	No Mutation Event in Heavy-smoker	P Value
ZFHX4	1	32	5	13	0.0167305
TRRAP	0	33	3	15	0.0391837
FAT2	0	33	2	16	0.12
FAT4	0	33	2	16	0.12
FLG2	0	33	2	16	0.12
GRM8	0	33	2	16	0.12
KIAA1549	0	33	2	16	0.12
LRFN5	0	33	2	16	0.12
NLRP11	0	33	2	16	0.12
PHLPP1	0	33	2	16	0.12
RB1CC1	0	33	2	16	0.12
SPAG17	0	33	2	16	0.12
THSD7A	0	33	2	16	0.12
COL11A1	1	32	3	15	0.12
FAT1	3	30	4	14	0.225746
FGFR3	3	30	4	14	0.225746
CNTN6	1	32	2	16	0.281633
COL6A3	1	32	2	16	0.281633
CTNND2	1	32	2	16	0.281633
EPHA7	1	32	2	16	0.281633
EZH2	1	32	2	16	0.281633
PIK3C3	1	32	2	16	0.281633
PKD1L1	1	32	2	16	0.281633
POLQ	1	32	2	16	0.281633
SI	1	32	2	16	0.281633
EP300	4	29	0	18	0.283745
SYNE2	4	29	0	18	0.283745
CSMD3	2	31	3	15	0.331082
HUWE1	2	31	3	15	0.331082
ABAT	0	33	1	17	0.352941
APC	0	33	1	17	0.352941
ARFGEF2	0	33	1	17	0.352941
ARHGAP30	0	33	1	17	0.352941
ARID1A	0	33	1	17	0.352941
B2M	0	33	1	17	0.352941
BAGE2	0	33	1	17	0.352941
BBS9	0	33	1	17	0.352941
BLM	0	33	1	17	0.352941
BRIP1	0	33	1	17	0.352941
BTBD12	0	33	1	17	0.352941
C1orf173	0	33	1	17	0.352941
CD8A	0	33	1	17	0.352941
CDH9	0	33	1	17	0.352941
CELSR3	0	33	1	17	0.352941
COQ3	0	33	1	17	0.352941
DCT	0	33	1	17	0.352941
DDR2	0	33	1	17	0.352941
DSPP	0	33	1	17	0.352941
DST	0	33	1	17	0.352941
EFCAB6	0	33	1	17	0.352941
EP400	0	33	1	17	0.352941
EPHB1	0	33	1	17	0.352941
ERBB4	0	33	1	17	0.352941
EWSR1	0	33	1	17	0.352941
FLT3	0	33	1	17	0.352941
HSCB	0	33	1	17	0.352941
INCENP	0	33	1	17	0.352941
IRF6	0	33	1	17	0.352941
ITK	0	33	1	17	0.352941
JAK1	0	33	1	17	0.352941
KDM5A	0	33	1	17	0.352941
KDR	0	33	1	17	0.352941
KIAA2022	0	33	1	17	0.352941
LILRA3	0	33	1	17	0.352941
LOC642587	0	33	1	17	0.352941
LRRC37B	0	33	1	17	0.352941
MAP2	0	33	1	17	0.352941
MDM2	0	33	1	17	0.352941
MED1	0	33	1	17	0.352941
MLLT10	0	33	1	17	0.352941
MYC	0	33	1	17	0.352941
MYH11	0	33	1	17	0.352941
MYH7B	0	33	1	17	0.352941
NAV3	0	33	1	17	0.352941
NELL2	0	33	1	17	0.352941
NRAP	0	33	1	17	0.352941
NRXN3	0	33	1	17	0.352941
OR8K1	0	33	1	17	0.352941
PALB2	0	33	1	17	0.352941
PARK2	0	33	1	17	0.352941
PCDHA1	0	33	1	17	0.352941
PCDHA12	0	33	1	17	0.352941
PHIP	0	33	1	17	0.352941
PHLPP2	0	33	1	17	0.352941
PLAG1	0	33	1	17	0.352941
PLEC	0	33	1	17	0.352941
PMS1	0	33	1	17	0.352941
PMS2	0	33	1	17	0.352941
PRDM7	0	33	1	17	0.352941
RAD51L1	0	33	1	17	0.352941
RELN	0	33	1	17	0.352941
RGAG1	0	33	1	17	0.352941
ROS1	0	33	1	17	0.352941
SLC2A13	0	33	1	17	0.352941
SLITRK3	0	33	1	17	0.352941
SMO	0	33	1	17	0.352941
SPTLC2	0	33	1	17	0.352941
SRGAP3	0	33	1	17	0.352941
SRPK2	0	33	1	17	0.352941
TET2	0	33	1	17	0.352941
TRIP11	0	33	1	17	0.352941
TSC1	0	33	1	17	0.352941
TSC2	0	33	1	17	0.352941
UBE3A	0	33	1	17	0.352941
UBE4A	0	33	1	17	0.352941
UNC5D	0	33	1	17	0.352941
VPS41	0	33	1	17	0.352941
ZEB2	0	33	1	17	0.352941
ZNF217	0	33	1	17	0.352941
ZNF790	0	33	1	17	0.352941
PIK3CA	6	27	5	13	0.487634
ASXL1	2	31	0	18	0.534118
FGFR2	2	31	0	18	0.534118
HRAS	2	31	0	18	0.534118
INPP4A	2	31	0	18	0.534118
MYH8	2	31	0	18	0.534118
NKAPL	2	31	0	18	0.534118
NRG2	2	31	0	18	0.534118
NRK	2	31	0	18	0.534118
NUP214	2	31	0	18	0.534118
PAK7	2	31	0	18	0.534118
PKHD1L1	2	31	0	18	0.534118
PLCB1	2	31	0	18	0.534118
UBR5	2	31	0	18	0.534118
ZNF521	2	31	0	18	0.534118
ZNF804B	2	31	0	18	0.534118
BRCA2	3	30	0	18	0.543625
STAT1	3	30	0	18	0.543625
ASH1L	2	31	2	16	0.607011
CDH12	2	31	2	16	0.607011
DNAH5	2	31	2	16	0.607011
MLL3	2	31	2	16	0.607011
MTOR	2	31	2	16	0.607011
NOTCH1	2	31	2	16	0.607011
PCLO	2	31	2	16	0.607011
ADAMTS12	4	29	1	17	0.644637
PEG3	4	29	1	17	0.644637
FLG	3	30	3	15	0.652363
SYNE1	3	30	3	15	0.652363
TTN	9	24	6	12	0.751288
ABCA12	0	33	0	18	1
ABCA4	0	33	0	18	1
ABCA6	0	33	0	18	1
ABCA9	0	33	0	18	1
ABCD2	2	31	1	17	1
ABHD13	1	32	0	18	1
ABL2	1	32	0	18	1
ACACB	1	32	0	18	1
ADAMTSL1	1	32	0	18	1
ADCY1	0	33	0	18	1
AHNAK	2	31	1	17	1
AIM1	0	33	0	18	1
AKAP1	0	33	0	18	1
AKT1	0	33	0	18	1
AKT3	0	33	0	18	1
AMD1	0	33	0	18	1
ANKHD1-EIF4EBP3	0	33	0	18	1
ANKRD17	0	33	0	18	1
ANO4	0	33	0	18	1
APOB	1	32	1	17	1
ATM	0	33	0	18	1
ATXN1	0	33	0	18	1
BAZ1B	0	33	0	18	1
BBX	2	31	1	17	1
BCL9	1	32	0	18	1
BIRC3	1	32	0	18	1
BRCA1	1	32	0	18	1
BRD4	0	33	0	18	1
BZRAP1	0	33	0	18	1
CABIN1	1	32	0	18	1
CARD11	0	33	0	18	1
CASP8	1	32	0	18	1
CBL	0	33	0	18	1
CCNA1	0	33	0	18	1
CCR2	0	33	0	18	1
CCR5	0	33	0	18	1
CD248	0	33	0	18	1
CDH1	1	32	0	18	1
CDH10	1	32	1	17	1
CDH11	1	32	0	18	1
CDKN2A	0	33	0	18	1
CHD5	1	32	0	18	1
CLCN4	1	32	0	18	1
CLSTN2	1	32	0	18	1
CNGA3	0	33	0	18	1
CNTNAP2	1	32	0	18	1
COL22A1	0	33	0	18	1
CREBBP	1	32	1	17	1
CRIPAK	1	32	1	17	1
CTNNB1	0	33	0	18	1
CUBN	2	31	1	17	1
CUL3	0	33	0	18	1
CYLD	2	31	1	17	1
CYP26A1	1	32	0	18	1
DCC	0	33	0	18	1
DDX3X	3	30	1	17	1
DGKG	0	33	0	18	1
DICER1	0	33	0	18	1
DNAH3	3	30	1	17	1
DOK6	0	33	0	18	1
DPYS	0	33	0	18	1
DSCAM	1	32	1	17	1
DSEL	2	31	1	17	1
DUSP5	1	32	0	18	1
DYRK1B	0	33	0	18	1
E2F3	0	33	0	18	1
E2F7	1	32	1	17	1
EBF1	1	32	0	18	1
EGFR	0	33	0	18	1
ENPP2	0	33	0	18	1
EPHA1	0	33	0	18	1
EPHA2	1	32	1	17	1
EPHA3	0	33	0	18	1
EPHB3	1	32	0	18	1
EPM2AIP1	0	33	0	18	1
EPS8	0	33	0	18	1
ERAS	1	32	0	18	1
ERBB3	1	32	0	18	1
ETV5	0	33	0	18	1
ETV6	1	32	0	18	1
FAM135B	0	33	0	18	1
FAM179B	1	32	0	18	1
FAM5B	1	32	0	18	1
FANCA	1	32	0	18	1
FANCD2	1	32	1	17	1
FANCG	1	32	0	18	1
FANCM	0	33	0	18	1
FARP2	1	32	0	18	1
FBXW7	1	32	1	17	1
FGFR1	0	33	0	18	1
FGFR4	1	32	0	18	1
FOXP1	0	33	0	18	1
FSTL5	1	32	0	18	1
GABRB3	0	33	0	18	1
GAS7	1	32	1	17	1
GC	0	33	0	18	1
GMPS	0	33	0	18	1
GNAQ	0	33	0	18	1
GPC5	1	32	1	17	1
GPR174	1	32	0	18	1
HBS1L	0	33	0	18	1
HDX	0	33	0	18	1
HERC2	0	33	0	18	1
HLA-A	1	32	0	18	1
HLA-B	1	32	0	18	1
HYDIN	1	32	0	18	1
IL6ST	0	33	0	18	1
INO80	1	32	0	18	1
INPP4B	1	32	0	18	1
INPP5D	1	32	0	18	1
INTS3	0	33	0	18	1
JAK2	1	32	0	18	1
KCTD8	1	32	0	18	1
KEAP1	0	33	0	18	1
KIAA1468	1	32	0	18	1
KIT	0	33	0	18	1
KRAS	2	31	1	17	1
KRT10	1	32	0	18	1
KRTAP4-3	1	32	0	18	1
KRTAP6-3	0	33	0	18	1
LAMB1	1	32	0	18	1
LILRA5	1	32	0	18	1
LILRB1	0	33	0	18	1
LILRB2	0	33	0	18	1
LOC200030	1	32	0	18	1
LRP1B	1	32	1	17	1
LRRK2	0	33	0	18	1
LRRTM1	0	33	0	18	1
LRRTM3	0	33	0	18	1
LTBP1	0	33	0	18	1
MACF1	1	32	0	18	1
MAML3	1	32	1	17	1
MAP3K1	0	33	0	18	1
MCOLN2	1	32	0	18	1
MECOM	0	33	0	18	1
MEF2C	0	33	0	18	1
MKL1	1	32	0	18	1
MLF1	1	32	0	18	1
MLL2	3	30	2	16	1
MMP16	1	32	0	18	1
MST1R	0	33	0	18	1
MTA2	0	33	0	18	1
MUC2	2	31	1	17	1
MUC21	0	33	0	18	1
MX2	1	32	0	18	1
MYH1	1	32	0	18	1
MYH13	1	32	0	18	1
MYH2	1	32	0	18	1
MYH4	1	32	1	17	1
MYH6	1	32	0	18	1
MYH7	1	32	0	18	1
MYH9	1	32	0	18	1
NACA2	0	33	0	18	1
NBPF1	0	33	0	18	1
NBPF3	1	32	0	18	1
NCOA3	0	33	0	18	1
NCOR1	1	32	0	18	1
NECAB1	0	33	0	18	1
NF1	2	31	1	17	1
NF2	0	33	0	18	1
NFATC3	0	33	0	18	1
NFE2L2	1	32	1	17	1
NKAP	1	32	0	18	1
NLRP12	0	33	0	18	1
NLRP4	0	33	0	18	1
NONO	1	32	0	18	1
NOTCH2	0	33	0	18	1
NOTCH3	0	33	0	18	1
NRAS	0	33	0	18	1
NSD1	1	32	0	18	1
NTRK3	0	33	0	18	1
NUMA1	0	33	0	18	1
ODZ1	1	32	0	18	1
OR4C15	0	33	0	18	1
OR51S1	0	33	0	18	1
OR5L2	0	33	0	18	1
OR8H1	0	33	0	18	1
OR8H2	0	33	0	18	1
PBRM1	1	32	1	17	1
PCDH15	1	32	1	17	1
PCDH17	1	32	0	18	1
PCDHA13	1	32	0	18	1
PCDHA2	0	33	0	18	1
PCDHA6	0	33	0	18	1
PCDHA8	1	32	0	18	1
PCDHAC2	0	33	0	18	1
PCDHB11	1	32	0	18	1
PCDHB12	0	33	0	18	1
PCDHB4	0	33	0	18	1
PCM1	0	33	0	18	1
PDE3A	1	32	0	18	1
PDE4DIP	1	32	1	17	1
PDGFRA	0	33	0	18	1
PHKA2	0	33	0	18	1
PHKB	0	33	0	18	1
PIK3C2A	1	32	0	18	1
PIK3C2B	0	33	0	18	1
PIK3C2G	0	33	0	18	1
PIK3CB	1	32	0	18	1
PIK3CG	0	33	0	18	1
PIK3R1	1	32	0	18	1
PIK3R2	1	32	0	18	1
PKHD1	1	32	1	17	1
PKP4	1	32	0	18	1
PLIN5	0	33	0	18	1
PLXNA1	0	33	0	18	1
PPP1R9A	1	32	0	18	1
PPP4R4	1	32	0	18	1
PRDM11	0	33	0	18	1
PRDM9	0	33	0	18	1
PRKCA	1	32	1	17	1
PROKR2	0	33	0	18	1
PRR21	1	32	0	18	1
PTEN	0	33	0	18	1
PTK6	0	33	0	18	1
PTPRF	1	32	0	18	1
PZP	0	33	0	18	1
RANBP17	0	33	0	18	1
RARG	0	33	0	18	1
RASA1	1	32	0	18	1
RB1	2	31	1	17	1
RBM15	0	33	0	18	1
RECQL4	1	32	0	18	1
REST	2	31	1	17	1
RIMBP2	0	33	0	18	1
RIMS2	1	32	0	18	1
RIPK4	1	32	1	17	1
RUFY1	1	32	0	18	1
RUNX1	1	32	0	18	1
RXFP3	1	32	0	18	1
SALL1	0	33	0	18	1
SBDS	1	32	0	18	1
SETBP1	0	33	0	18	1
SETD2	0	33	0	18	1
SFMBT2	0	33	0	18	1
SFRS14	0	33	0	18	1
SLC26A3	1	32	1	17	1
SLCO5A1	0	33	0	18	1
SMAD1	1	32	0	18	1
SMAD4	0	33	0	18	1
SMARCA4	0	33	0	18	1
SMC6	0	33	0	18	1
SPTA1	1	32	0	18	1
SPTBN4	1	32	0	18	1
STAT3	0	33	0	18	1
STYK1	0	33	0	18	1
TAP2	1	32	0	18	1
TDRD3	0	33	0	18	1
TEX15	1	32	1	17	1
TFRC	2	31	1	17	1
TGFBR2	1	32	1	17	1
TMEM132D	1	32	0	18	1
TNFAIP3	1	32	0	18	1
TP53	1	32	1	17	1
TP63	1	32	1	17	1
TPM3	0	33	0	18	1
TPP2	1	32	1	17	1
TPRX1	2	31	1	17	1
TRAF3	1	32	1	17	1
TRIO	0	33	0	18	1
USH2A	2	31	1	17	1
USP26	1	32	0	18	1
USP6	1	32	0	18	1
VWA5A	0	33	0	18	1
WBSCR17	0	33	0	18	1
WDR63	0	33	0	18	1
WHSC1	0	33	0	18	1
WHSC1L1	0	33	0	18	1
WRN	0	33	0	18	1
WT1	1	32	0	18	1
XPC	0	33	0	18	1
XRCC6	1	32	0	18	1
YTHDC1	0	33	0	18	1
ZNF180	0	33	0	18	1
ZNF19	0	33	0	18	1
ZNF426	1	32	0	18	1
ZNF433	0	33	0	18	1
ZNF439	0	33	0	18	1
ZNF440	0	33	0	18	1
ZNF443	0	33	0	18	1
ZNF461	1	32	0	18	1
ZNF501	1	32	0	18	1
ZNF534	0	33	0	18	1
ZNF571	0	33	0	18	1
ZNF665	1	32	0	18	1
ZNF699	0	33	0	18	1
ZNF761	0	33	0	18	1
ZNF799	1	32	0	18	1
ZNF823	0	33	0	18	1
ZNF83	1	32	0	18	1
Supplementary Table S2(B).4 Mutation event difference between smokers and non-smokers in HPV+ oropharynx tumor samples
Gene Name	Mutation Event in Non-smoker+light-smoker	No Mutation Event in Non-smoker+light-smoker	Mutation Event in Heavy-smoker	No Mutation Event in Heavy-smoker	P Value
TRRAP	0	30	3	14	0.0419365
ZFHX4	1	29	4	13	0.0505809
GRM8	0	30	2	15	0.125809
NLRP11	0	30	2	15	0.125809
PHLPP1	0	30	2	15	0.125809
SPAG17	0	30	2	15	0.125809
THSD7A	0	30	2	15	0.125809
FGFR3	2	28	4	13	0.170159
FAT1	3	27	4	13	0.235026
EP300	4	26	0	17	0.281361
SYNE2	4	26	0	17	0.281361
ADAMTS12	3	27	0	17	0.292322
BRCA2	3	27	0	17	0.292322
PEG3	3	27	0	17	0.292322
STAT1	3	27	0	17	0.292322
HUWE1	2	28	3	14	0.33632
ABAT	0	30	1	16	0.361702
ARHGAP30	0	30	1	16	0.361702
ARID1A	0	30	1	16	0.361702
B2M	0	30	1	16	0.361702
BAGE2	0	30	1	16	0.361702
BLM	0	30	1	16	0.361702
BRIP1	0	30	1	16	0.361702
BTBD12	0	30	1	16	0.361702
C1orf173	0	30	1	16	0.361702
CD8A	0	30	1	16	0.361702
COQ3	0	30	1	16	0.361702
DCT	0	30	1	16	0.361702
DDR2	0	30	1	16	0.361702
DSPP	0	30	1	16	0.361702
EFCAB6	0	30	1	16	0.361702
EP400	0	30	1	16	0.361702
EPHB1	0	30	1	16	0.361702
ERBB4	0	30	1	16	0.361702
EWSR1	0	30	1	16	0.361702
FAT2	0	30	1	16	0.361702
FAT4	0	30	1	16	0.361702
FLG2	0	30	1	16	0.361702
FLT3	0	30	1	16	0.361702
HSCB	0	30	1	16	0.361702
INCENP	0	30	1	16	0.361702
IRF6	0	30	1	16	0.361702
KDM5A	0	30	1	16	0.361702
KIAA1549	0	30	1	16	0.361702
KIAA2022	0	30	1	16	0.361702
LILRA3	0	30	1	16	0.361702
LOC642587	0	30	1	16	0.361702
LRFN5	0	30	1	16	0.361702
LRP1B	0	30	1	16	0.361702
LRRC37B	0	30	1	16	0.361702
MDM2	0	30	1	16	0.361702
MED1	0	30	1	16	0.361702
MLLT10	0	30	1	16	0.361702
MYC	0	30	1	16	0.361702
MYH7B	0	30	1	16	0.361702
NRXN3	0	30	1	16	0.361702
PALB2	0	30	1	16	0.361702
PARK2	0	30	1	16	0.361702
PCDHA1	0	30	1	16	0.361702
PCDHA12	0	30	1	16	0.361702
PHIP	0	30	1	16	0.361702
PLEC	0	30	1	16	0.361702
PMS1	0	30	1	16	0.361702
PMS2	0	30	1	16	0.361702
RAD51L1	0	30	1	16	0.361702
RB1CC1	0	30	1	16	0.361702
RGAG1	0	30	1	16	0.361702
RIPK4	0	30	1	16	0.361702
SLITRK3	0	30	1	16	0.361702
SRGAP3	0	30	1	16	0.361702
SRPK2	0	30	1	16	0.361702
TET2	0	30	1	16	0.361702
TRAF3	0	30	1	16	0.361702
TRIP11	0	30	1	16	0.361702
TSC1	0	30	1	16	0.361702
TSC2	0	30	1	16	0.361702
UNC5D	0	30	1	16	0.361702
VPS41	0	30	1	16	0.361702
ZNF217	0	30	1	16	0.361702
PIK3CA	6	24	5	12	0.493304
ASXL1	2	28	0	17	0.528215
DSEL	2	28	0	17	0.528215
FGFR2	2	28	0	17	0.528215
HRAS	2	28	0	17	0.528215
INPP4A	2	28	0	17	0.528215
MYH8	2	28	0	17	0.528215
NF1	2	28	0	17	0.528215
NKAPL	2	28	0	17	0.528215
NRG2	2	28	0	17	0.528215
NRK	2	28	0	17	0.528215
NUP214	2	28	0	17	0.528215
PAK7	2	28	0	17	0.528215
PKHD1L1	2	28	0	17	0.528215
PLCB1	2	28	0	17	0.528215
UBR5	2	28	0	17	0.528215
ZNF521	2	28	0	17	0.528215
ZNF804B	2	28	0	17	0.528215
ASH1L	1	29	2	15	0.543941
COL11A1	1	29	2	15	0.543941
CTNND2	1	29	2	15	0.543941
SI	1	29	2	15	0.543941
CSMD3	2	28	2	15	0.613041
NOTCH1	2	28	2	15	0.613041
FLG	3	27	3	14	0.652894
ABCD2	2	28	1	16	1
AHNAK	2	28	1	16	1
BBX	2	28	1	16	1
CDH12	2	28	1	16	1
CNTN6	1	29	1	16	1
COL6A3	1	29	1	16	1
CRIPAK	1	29	1	16	1
CUBN	2	28	1	16	1
CYLD	2	28	1	16	1
DDX3X	2	28	1	16	1
DNAH5	2	28	1	16	1
DSCAM	1	29	1	16	1
EPHA2	1	29	1	16	1
EPHA7	1	29	1	16	1
EZH2	1	29	1	16	1
FANCD2	1	29	1	16	1
FBXW7	1	29	1	16	1
GAS7	1	29	1	16	1
GPC5	1	29	1	16	1
KRAS	2	28	1	16	1
MAML3	1	29	1	16	1
MLL3	2	28	1	16	1
MTOR	1	29	1	16	1
MUC2	2	28	1	16	1
NFE2L2	1	29	1	16	1
PCDH15	1	29	1	16	1
PCLO	2	28	1	16	1
PDE4DIP	1	29	1	16	1
PIK3C3	1	29	1	16	1
PKD1L1	1	29	1	16	1
POLQ	1	29	1	16	1
PRKCA	1	29	1	16	1
RB1	2	28	1	16	1
REST	2	28	1	16	1
TEX15	1	29	1	16	1
TFRC	2	28	1	16	1
TGFBR2	1	29	1	16	1
TP53	1	29	1	16	1
TP63	1	29	1	16	1
TPP2	1	29	1	16	1
TPRX1	2	28	1	16	1
USH2A	2	28	1	16	1
ABCA12	0	30	0	17	1
ABCA4	0	30	0	17	1
ABCA6	0	30	0	17	1
ABCA9	0	30	0	17	1
ABHD13	1	29	0	17	1
ABL2	1	29	0	17	1
ACACB	1	29	0	17	1
ADAMTSL1	1	29	0	17	1
ADCY1	0	30	0	17	1
AIM1	0	30	0	17	1
AKAP1	0	30	0	17	1
AKT1	0	30	0	17	1
AKT3	0	30	0	17	1
AMD1	0	30	0	17	1
ANKHD1-EIF4EBP3	0	30	0	17	1
ANKRD17	0	30	0	17	1
ANO4	0	30	0	17	1
APC	0	30	0	17	1
APOB	1	29	0	17	1
ARFGEF2	0	30	0	17	1
ATM	0	30	0	17	1
ATXN1	0	30	0	17	1
BAZ1B	0	30	0	17	1
BBS9	0	30	0	17	1
BCL9	1	29	0	17	1
BIRC3	1	29	0	17	1
BRCA1	0	30	0	17	1
BRD4	0	30	0	17	1
BZRAP1	0	30	0	17	1
CABIN1	1	29	0	17	1
CARD11	0	30	0	17	1
CASP8	1	29	0	17	1
CBL	0	30	0	17	1
CCNA1	0	30	0	17	1
CCR2	0	30	0	17	1
CCR5	0	30	0	17	1
CD248	0	30	0	17	1
CDH1	1	29	0	17	1
CDH10	1	29	0	17	1
CDH11	1	29	0	17	1
CDH9	0	30	0	17	1
CDKN2A	0	30	0	17	1
CELSR3	0	30	0	17	1
CHD5	1	29	0	17	1
CLCN4	1	29	0	17	1
CLSTN2	1	29	0	17	1
CNGA3	0	30	0	17	1
CNTNAP2	1	29	0	17	1
COL22A1	0	30	0	17	1
CREBBP	1	29	0	17	1
CTNNB1	0	30	0	17	1
CUL3	0	30	0	17	1
CYP26A1	1	29	0	17	1
DCC	0	30	0	17	1
DGKG	0	30	0	17	1
DICER1	0	30	0	17	1
DNAH3	3	27	1	16	1
DOK6	0	30	0	17	1
DPYS	0	30	0	17	1
DST	0	30	0	17	1
DUSP5	1	29	0	17	1
DYRK1B	0	30	0	17	1
E2F3	0	30	0	17	1
E2F7	1	29	0	17	1
EBF1	1	29	0	17	1
EGFR	0	30	0	17	1
ENPP2	0	30	0	17	1
EPHA1	0	30	0	17	1
EPHA3	0	30	0	17	1
EPHB3	1	29	0	17	1
EPM2AIP1	0	30	0	17	1
EPS8	0	30	0	17	1
ERAS	1	29	0	17	1
ERBB3	1	29	0	17	1
ETV5	0	30	0	17	1
ETV6	1	29	0	17	1
FAM135B	0	30	0	17	1
FAM179B	1	29	0	17	1
FAM5B	0	30	0	17	1
FANCA	0	30	0	17	1
FANCG	1	29	0	17	1
FANCM	0	30	0	17	1
FARP2	1	29	0	17	1
FGFR1	0	30	0	17	1
FGFR4	1	29	0	17	1
FOXP1	0	30	0	17	1
FSTL5	1	29	0	17	1
GABRB3	0	30	0	17	1
GC	0	30	0	17	1
GMPS	0	30	0	17	1
GNAQ	0	30	0	17	1
GPR174	1	29	0	17	1
HBS1L	0	30	0	17	1
HDX	0	30	0	17	1
HERC2	0	30	0	17	1
HLA-A	1	29	0	17	1
HLA-B	0	30	0	17	1
HYDIN	1	29	0	17	1
IL6ST	0	30	0	17	1
INO80	1	29	0	17	1
INPP4B	1	29	0	17	1
INPP5D	1	29	0	17	1
INTS3	0	30	0	17	1
ITK	0	30	0	17	1
JAK1	0	30	0	17	1
JAK2	1	29	0	17	1
KCTD8	1	29	0	17	1
KDR	0	30	0	17	1
KEAP1	0	30	0	17	1
KIAA1468	1	29	0	17	1
KIT	0	30	0	17	1
KRT10	0	30	0	17	1
KRTAP4-3	1	29	0	17	1
KRTAP6-3	0	30	0	17	1
LAMB1	1	29	0	17	1
LILRA5	1	29	0	17	1
LILRB1	0	30	0	17	1
LILRB2	0	30	0	17	1
LOC200030	1	29	0	17	1
LRRK2	0	30	0	17	1
LRRTM1	0	30	0	17	1
LRRTM3	0	30	0	17	1
LTBP1	0	30	0	17	1
MACF1	1	29	0	17	1
MAP2	0	30	0	17	1
MAP3K1	0	30	0	17	1
MCOLN2	1	29	0	17	1
MECOM	0	30	0	17	1
MEF2C	0	30	0	17	1
MKL1	1	29	0	17	1
MLF1	0	30	0	17	1
MLL2	3	27	2	15	1
MMP16	1	29	0	17	1
MST1R	0	30	0	17	1
MTA2	0	30	0	17	1
MUC21	0	30	0	17	1
MX2	1	29	0	17	1
MYH1	1	29	0	17	1
MYH11	0	30	0	17	1
MYH13	1	29	0	17	1
MYH2	1	29	0	17	1
MYH4	1	29	0	17	1
MYH6	1	29	0	17	1
MYH7	1	29	0	17	1
MYH9	1	29	0	17	1
NACA2	0	30	0	17	1
NAV3	0	30	0	17	1
NBPF1	0	30	0	17	1
NBPF3	1	29	0	17	1
NCOA3	0	30	0	17	1
NCOR1	1	29	0	17	1
NECAB1	0	30	0	17	1
NELL2	0	30	0	17	1
NF2	0	30	0	17	1
NFATC3	0	30	0	17	1
NKAP	1	29	0	17	1
NLRP12	0	30	0	17	1
NLRP4	0	30	0	17	1
NONO	1	29	0	17	1
NOTCH2	0	30	0	17	1
NOTCH3	0	30	0	17	1
NRAP	0	30	0	17	1
NRAS	0	30	0	17	1
NSD1	1	29	0	17	1
NTRK3	0	30	0	17	1
NUMA1	0	30	0	17	1
ODZ1	1	29	0	17	1
OR4C15	0	30	0	17	1
OR51S1	0	30	0	17	1
OR5L2	0	30	0	17	1
OR8H1	0	30	0	17	1
OR8H2	0	30	0	17	1
OR8K1	0	30	0	17	1
PBRM1	1	29	0	17	1
PCDH17	1	29	0	17	1
PCDHA13	1	29	0	17	1
PCDHA2	0	30	0	17	1
PCDHA6	0	30	0	17	1
PCDHA8	1	29	0	17	1
PCDHAC2	0	30	0	17	1
PCDHB11	1	29	0	17	1
PCDHB12	0	30	0	17	1
PCDHB4	0	30	0	17	1
PCM1	0	30	0	17	1
PDE3A	1	29	0	17	1
PDGFRA	0	30	0	17	1
PHKA2	0	30	0	17	1
PHKB	0	30	0	17	1
PHLPP2	0	30	0	17	1
PIK3C2A	1	29	0	17	1
PIK3C2B	0	30	0	17	1
PIK3C2G	0	30	0	17	1
PIK3CB	1	29	0	17	1
PIK3CG	0	30	0	17	1
PIK3R1	0	30	0	17	1
PIK3R2	1	29	0	17	1
PKHD1	1	29	0	17	1
PKP4	1	29	0	17	1
PLAG1	0	30	0	17	1
PLIN5	0	30	0	17	1
PLXNA1	0	30	0	17	1
PPP1R9A	1	29	0	17	1
PPP4R4	1	29	0	17	1
PRDM11	0	30	0	17	1
PRDM7	0	30	0	17	1
PRDM9	0	30	0	17	1
PROKR2	0	30	0	17	1
PRR21	1	29	0	17	1
PTEN	0	30	0	17	1
PTK6	0	30	0	17	1
PTPRF	1	29	0	17	1
PZP	0	30	0	17	1
RANBP17	0	30	0	17	1
RARG	0	30	0	17	1
RASA1	1	29	0	17	1
RBM15	0	30	0	17	1
RECQL4	1	29	0	17	1
RELN	0	30	0	17	1
RIMBP2	0	30	0	17	1
RIMS2	1	29	0	17	1
ROS1	0	30	0	17	1
RUFY1	1	29	0	17	1
RUNX1	1	29	0	17	1
RXFP3	1	29	0	17	1
SALL1	0	30	0	17	1
SBDS	1	29	0	17	1
SETBP1	0	30	0	17	1
SETD2	0	30	0	17	1
SFMBT2	0	30	0	17	1
SFRS14	0	30	0	17	1
SLC26A3	1	29	0	17	1
SLC2A13	0	30	0	17	1
SLCO5A1	0	30	0	17	1
SMAD1	1	29	0	17	1
SMAD4	0	30	0	17	1
SMARCA4	0	30	0	17	1
SMC6	0	30	0	17	1
SMO	0	30	0	17	1
SPTA1	1	29	0	17	1
SPTBN4	1	29	0	17	1
SPTLC2	0	30	0	17	1
STAT3	0	30	0	17	1
STYK1	0	30	0	17	1
SYNE1	3	27	2	15	1
TAP2	1	29	0	17	1
TDRD3	0	30	0	17	1
TMEM132D	1	29	0	17	1
TNFAIP3	1	29	0	17	1
TPM3	0	30	0	17	1
TRIO	0	30	0	17	1
TTN	9	21	5	12	1
UBE3A	0	30	0	17	1
UBE4A	0	30	0	17	1
USP26	1	29	0	17	1
USP6	1	29	0	17	1
VWA5A	0	30	0	17	1
WBSCR17	0	30	0	17	1
WDR63	0	30	0	17	1
WHSC1	0	30	0	17	1
WHSC1L1	0	30	0	17	1
WRN	0	30	0	17	1
WT1	1	29	0	17	1
XPC	0	30	0	17	1
XRCC6	1	29	0	17	1
YTHDC1	0	30	0	17	1
ZEB2	0	30	0	17	1
ZNF180	0	30	0	17	1
ZNF19	0	30	0	17	1
ZNF426	1	29	0	17	1
ZNF433	0	30	0	17	1
ZNF439	0	30	0	17	1
ZNF440	0	30	0	17	1
ZNF443	0	30	0	17	1
ZNF461	1	29	0	17	1
ZNF501	1	29	0	17	1
ZNF534	0	30	0	17	1
ZNF571	0	30	0	17	1
ZNF665	1	29	0	17	1
ZNF699	0	30	0	17	1
ZNF761	0	30	0	17	1
ZNF790	0	30	0	17	1
ZNF799	1	29	0	17	1
ZNF823	0	30	0	17	1
ZNF83	1	29	0	17	1
Supplementary Table S2(B).5 Mutation event difference between smokers and non-smokers in HPV- tumor samples
Gene Name	Mutation Event in Non-smoker+light-smoker	No Mutation Event in Non-smoker+light-smoker	Mutation Event in Heavy-smoker	No Mutation Event in Heavy-smoker	P Value
WRN	2	19	0	48	0.0895141
YTHDC1	2	19	0	48	0.0895141
CSMD3	3	18	17	31	0.0905048
FLG	0	21	8	40	0.0952346
FAT2	3	18	2	46	0.160864
PIK3C2G	3	18	2	46	0.160864
ZNF804B	3	18	2	46	0.160864
NSD1	0	21	6	42	0.167284
SYNE2	0	21	6	42	0.167284
TTN	5	16	20	28	0.183551
INPP4B	2	19	1	47	0.217773
FAT1	4	17	4	44	0.234512
ABAT	1	20	0	48	0.304348
AKT1	1	20	0	48	0.304348
AKT3	1	20	0	48	0.304348
ANKRD17	1	20	0	48	0.304348
APC	1	20	0	48	0.304348
ATM	1	20	0	48	0.304348
BRD4	1	20	0	48	0.304348
CBL	1	20	0	48	0.304348
COL6A3	1	20	0	48	0.304348
CTNNB1	1	20	0	48	0.304348
DPYS	1	20	0	48	0.304348
FANCM	1	20	0	48	0.304348
FLT3	1	20	0	48	0.304348
GABRB3	1	20	0	48	0.304348
GAS7	1	20	0	48	0.304348
GC	1	20	0	48	0.304348
INTS3	1	20	0	48	0.304348
JAK2	1	20	0	48	0.304348
LRRTM3	1	20	0	48	0.304348
MAP3K1	1	20	0	48	0.304348
MUC2	1	20	0	48	0.304348
NCOA3	1	20	0	48	0.304348
NRG2	1	20	0	48	0.304348
OR8H2	1	20	0	48	0.304348
PCDHA2	1	20	0	48	0.304348
PCDHA8	1	20	0	48	0.304348
PHKB	1	20	0	48	0.304348
PIK3CB	1	20	0	48	0.304348
PLXNA1	1	20	0	48	0.304348
PROKR2	1	20	0	48	0.304348
RB1	1	20	0	48	0.304348
RBM15	1	20	0	48	0.304348
SFMBT2	1	20	0	48	0.304348
SLC26A3	1	20	0	48	0.304348
SRPK2	1	20	0	48	0.304348
TDRD3	1	20	0	48	0.304348
TPM3	1	20	0	48	0.304348
VPS41	1	20	0	48	0.304348
XPC	1	20	0	48	0.304348
ZNF433	1	20	0	48	0.304348
ZNF439	1	20	0	48	0.304348
ZNF440	1	20	0	48	0.304348
ZNF443	1	20	0	48	0.304348
ZNF699	1	20	0	48	0.304348
ZNF761	1	20	0	48	0.304348
APOB	0	21	4	44	0.305847
C1orf173	0	21	4	44	0.305847
CUL3	0	21	4	44	0.305847
FAM135B	0	21	4	44	0.305847
THSD7A	0	21	4	44	0.305847
RB1CC1	0	21	5	43	0.313224
PCDH15	3	18	3	45	0.359177
TP53	15	6	39	9	0.363199
CDH9	1	20	6	42	0.426845
ZFHX4	4	17	6	42	0.478962
CDKN2A	5	16	8	40	0.515232
ABCA9	1	20	1	47	0.519182
ASH1L	1	20	1	47	0.519182
CARD11	1	20	1	47	0.519182
CASP8	1	20	1	47	0.519182
CELSR3	1	20	1	47	0.519182
CNTN6	1	20	1	47	0.519182
DOK6	1	20	1	47	0.519182
EP300	1	20	1	47	0.519182
EPHA2	1	20	1	47	0.519182
ERBB4	1	20	1	47	0.519182
FAT4	1	20	1	47	0.519182
HRAS	1	20	1	47	0.519182
HYDIN	1	20	1	47	0.519182
KIAA1549	1	20	1	47	0.519182
LRFN5	1	20	1	47	0.519182
MAML3	1	20	1	47	0.519182
MEF2C	1	20	1	47	0.519182
MYH1	1	20	1	47	0.519182
NBPF1	1	20	1	47	0.519182
NCOR1	1	20	1	47	0.519182
PAK7	1	20	1	47	0.519182
PKHD1	1	20	1	47	0.519182
PLCB1	1	20	1	47	0.519182
POLQ	1	20	1	47	0.519182
PRDM9	1	20	1	47	0.519182
PZP	1	20	1	47	0.519182
RIPK4	1	20	1	47	0.519182
SETBP1	1	20	1	47	0.519182
SFRS14	1	20	1	47	0.519182
SLCO5A1	1	20	1	47	0.519182
WDR63	1	20	1	47	0.519182
SYNE1	3	18	12	36	0.526654
ADAMTS12	0	21	3	45	0.547887
CDH12	0	21	3	45	0.547887
COL11A1	0	21	3	45	0.547887
EPHA3	0	21	3	45	0.547887
HDX	0	21	3	45	0.547887
MTOR	0	21	3	45	0.547887
ODZ1	0	21	3	45	0.547887
ROS1	0	21	3	45	0.547887
DDR2	2	19	2	46	0.579855
MAP2	2	19	2	46	0.579855
NOTCH3	2	19	2	46	0.579855
PDE3A	2	19	2	46	0.579855
ZNF521	2	19	2	46	0.579855
HUWE1	2	19	3	45	0.636413
NOTCH2	2	19	3	45	0.636413
PIK3CG	2	19	3	45	0.636413
SI	3	18	4	44	0.666712
SPTA1	3	18	4	44	0.666712
PIK3CA	3	18	5	43	0.691798
LRP1B	2	19	8	40	0.712008
PKHD1L1	2	19	8	40	0.712008
USH2A	2	19	8	40	0.712008
NOTCH1	4	17	7	41	0.724821
ABCA12	1	20	2	46	1
ABCA4	0	21	2	46	1
ABCA6	0	21	2	46	1
ABCD2	0	21	1	47	1
ABHD13	0	21	0	48	1
ABL2	0	21	1	47	1
ACACB	0	21	0	48	1
ADAMTSL1	0	21	0	48	1
ADCY1	0	21	1	47	1
AHNAK	1	20	4	44	1
AIM1	0	21	1	47	1
AKAP1	0	21	1	47	1
AMD1	0	21	1	47	1
ANKHD1-EIF4EBP3	0	21	1	47	1
ANO4	0	21	1	47	1
ARFGEF2	0	21	0	48	1
ARHGAP30	0	21	1	47	1
ARID1A	0	21	1	47	1
ASXL1	0	21	1	47	1
ATXN1	0	21	1	47	1
B2M	0	21	0	48	1
BAGE2	0	21	1	47	1
BAZ1B	0	21	1	47	1
BBS9	0	21	0	48	1
BBX	0	21	1	47	1
BCL9	0	21	0	48	1
BIRC3	0	21	0	48	1
BLM	0	21	1	47	1
BRCA1	0	21	0	48	1
BRCA2	0	21	1	47	1
BRIP1	0	21	1	47	1
BTBD12	0	21	1	47	1
BZRAP1	0	21	1	47	1
CABIN1	0	21	0	48	1
CCNA1	0	21	1	47	1
CCR2	0	21	1	47	1
CCR5	0	21	1	47	1
CD248	0	21	1	47	1
CD8A	0	21	0	48	1
CDH1	0	21	0	48	1
CDH10	0	21	0	48	1
CDH11	0	21	1	47	1
CHD5	0	21	0	48	1
CLCN4	0	21	0	48	1
CLSTN2	0	21	0	48	1
CNGA3	0	21	1	47	1
CNTNAP2	1	20	3	45	1
COL22A1	0	21	1	47	1
COQ3	0	21	1	47	1
CREBBP	0	21	0	48	1
CRIPAK	0	21	0	48	1
CTNND2	0	21	0	48	1
CUBN	1	20	2	46	1
CYLD	0	21	1	47	1
CYP26A1	0	21	0	48	1
DCC	0	21	1	47	1
DCT	0	21	0	48	1
DDX3X	0	21	0	48	1
DGKG	0	21	1	47	1
DICER1	1	20	2	46	1
DNAH3	0	21	1	47	1
DNAH5	1	20	4	44	1
DSCAM	0	21	2	46	1
DSEL	0	21	1	47	1
DSPP	0	21	2	46	1
DST	0	21	1	47	1
DUSP5	0	21	0	48	1
DYRK1B	0	21	1	47	1
E2F3	0	21	1	47	1
E2F7	0	21	0	48	1
EBF1	0	21	1	47	1
EFCAB6	0	21	1	47	1
EGFR	0	21	2	46	1
ENPP2	0	21	1	47	1
EP400	0	21	0	48	1
EPHA1	0	21	1	47	1
EPHA7	0	21	1	47	1
EPHB1	0	21	0	48	1
EPHB3	0	21	0	48	1
EPM2AIP1	0	21	1	47	1
EPS8	0	21	1	47	1
ERAS	0	21	0	48	1
ERBB3	0	21	0	48	1
ETV5	0	21	1	47	1
ETV6	0	21	0	48	1
EWSR1	0	21	0	48	1
EZH2	0	21	0	48	1
FAM179B	1	20	2	46	1
FAM5B	0	21	0	48	1
FANCA	0	21	1	47	1
FANCD2	0	21	0	48	1
FANCG	0	21	0	48	1
FARP2	0	21	0	48	1
FBXW7	1	20	3	45	1
FGFR1	0	21	1	47	1
FGFR2	0	21	0	48	1
FGFR3	0	21	0	48	1
FGFR4	0	21	0	48	1
FLG2	0	21	0	48	1
FOXP1	0	21	1	47	1
FSTL5	0	21	1	47	1
GMPS	0	21	1	47	1
GNAQ	0	21	1	47	1
GPC5	0	21	1	47	1
GPR174	0	21	1	47	1
GRM8	0	21	2	46	1
HBS1L	0	21	0	48	1
HERC2	0	21	1	47	1
HLA-A	0	21	0	48	1
HLA-B	0	21	0	48	1
HSCB	0	21	0	48	1
IL6ST	0	21	1	47	1
INCENP	0	21	0	48	1
INO80	0	21	0	48	1
INPP4A	0	21	2	46	1
INPP5D	0	21	0	48	1
IRF6	0	21	1	47	1
ITK	0	21	0	48	1
JAK1	0	21	0	48	1
KCTD8	0	21	1	47	1
KDM5A	0	21	0	48	1
KDR	0	21	2	46	1
KEAP1	1	20	3	45	1
KIAA1468	0	21	1	47	1
KIAA2022	0	21	1	47	1
KIT	0	21	1	47	1
KRAS	0	21	1	47	1
KRT10	0	21	0	48	1
KRTAP4-3	0	21	0	48	1
KRTAP6-3	0	21	1	47	1
LAMB1	0	21	0	48	1
LILRA3	0	21	0	48	1
LILRA5	0	21	0	48	1
LILRB1	0	21	1	47	1
LILRB2	0	21	1	47	1
LOC200030	0	21	0	48	1
LOC642587	0	21	0	48	1
LRRC37B	0	21	0	48	1
LRRK2	0	21	1	47	1
LRRTM1	0	21	2	46	1
LTBP1	0	21	1	47	1
MACF1	1	20	3	45	1
MCOLN2	0	21	0	48	1
MDM2	0	21	0	48	1
MECOM	0	21	1	47	1
MED1	0	21	1	47	1
MKL1	0	21	0	48	1
[truncated: 592 more rows]

## Sheet: S2(C) Drinkers vs. Non-drinkers
Supplementary Table S2(C).1 Mutation event difference between drinkers and non-drinkers in all tumor samples
Gene Name	Mutation Event in Non-drinker+light-drinker	No Mutation Event in Non-drinker+light-drinker	Mutation Event in Heavy-drinker	No Mutation Event in Heavy-drinker	P Value
RB1	4	45	0	71	0.0257927
DNAH5	7	42	2	69	0.030795
TP53	17	32	39	32	0.0403373
AHNAK	6	43	2	69	0.0618127
ERBB4	3	46	0	71	0.0656032
PIK3C3	3	46	0	71	0.0656032
SLC26A3	3	46	0	71	0.0656032
CDKN2A	2	47	11	60	0.0712633
SYNE1	5	44	16	55	0.0923314
PKHD1L1	2	47	10	61	0.119461
BBX	0	49	4	67	0.144075
CUL3	0	49	4	67	0.144075
FAM179B	0	49	4	67	0.144075
PAK7	0	49	4	67	0.144075
CNTNAP2	4	45	1	70	0.157258
BLM	2	47	0	71	0.164706
CDH10	2	47	0	71	0.164706
CRIPAK	2	47	0	71	0.164706
FLG2	2	47	0	71	0.164706
MED1	2	47	0	71	0.164706
NLRP11	2	47	0	71	0.164706
PCDHA8	2	47	0	71	0.164706
PIK3CB	2	47	0	71	0.164706
SLITRK3	2	47	0	71	0.164706
SRPK2	2	47	0	71	0.164706
MLL2	4	45	12	59	0.186089
MLL3	5	44	3	68	0.269073
SPTA1	5	44	3	68	0.269073
DICER1	0	49	3	68	0.269118
EPHA3	0	49	3	68	0.269118
HDX	0	49	3	68	0.269118
PTPRF	0	49	3	68	0.269118
REST	0	49	3	68	0.269118
TFRC	0	49	3	68	0.269118
TP63	0	49	3	68	0.269118
TSC1	0	49	3	68	0.269118
EPHA7	3	46	1	70	0.303317
FAT4	3	46	1	70	0.303317
KIAA1549	3	46	1	70	0.303317
PKHD1	3	46	1	70	0.303317
PIK3CA	10	39	9	62	0.311692
TTN	19	30	21	50	0.328321
FLG	4	45	10	61	0.394953
DDR2	3	46	2	69	0.397494
PEG3	3	46	2	69	0.397494
PIK3CG	3	46	2	69	0.397494
APOB	1	48	5	66	0.3989
MYH8	1	48	5	66	0.3989
ZNF521	1	48	5	66	0.3989
AKT3	1	48	0	71	0.408333
AMD1	1	48	0	71	0.408333
ANKHD1-EIF4EBP3	1	48	0	71	0.408333
ARFGEF2	1	48	0	71	0.408333
BBS9	1	48	0	71	0.408333
BIRC3	1	48	0	71	0.408333
BRCA1	1	48	0	71	0.408333
BZRAP1	1	48	0	71	0.408333
CBL	1	48	0	71	0.408333
CCNA1	1	48	0	71	0.408333
CDH1	1	48	0	71	0.408333
CLCN4	1	48	0	71	0.408333
CLSTN2	1	48	0	71	0.408333
COL22A1	1	48	0	71	0.408333
CTNNB1	1	48	0	71	0.408333
DCT	1	48	0	71	0.408333
DGKG	1	48	0	71	0.408333
DPYS	1	48	0	71	0.408333
EPHB1	1	48	0	71	0.408333
EPS8	1	48	0	71	0.408333
ERAS	1	48	0	71	0.408333
FARP2	1	48	0	71	0.408333
FGFR4	1	48	0	71	0.408333
GABRB3	1	48	0	71	0.408333
GC	1	48	0	71	0.408333
HERC2	1	48	0	71	0.408333
HSCB	1	48	0	71	0.408333
INCENP	1	48	0	71	0.408333
INTS3	1	48	0	71	0.408333
ITK	1	48	0	71	0.408333
JAK1	1	48	0	71	0.408333
KDM5A	1	48	0	71	0.408333
KRT10	1	48	0	71	0.408333
LILRA3	1	48	0	71	0.408333
LRRK2	1	48	0	71	0.408333
MDM2	1	48	0	71	0.408333
MLF1	1	48	0	71	0.408333
MMP16	1	48	0	71	0.408333
MTA2	1	48	0	71	0.408333
MUC21	1	48	0	71	0.408333
MYH6	1	48	0	71	0.408333
MYH7	1	48	0	71	0.408333
MYH7B	1	48	0	71	0.408333
NCOA3	1	48	0	71	0.408333
NELL2	1	48	0	71	0.408333
NF2	1	48	0	71	0.408333
NFATC3	1	48	0	71	0.408333
NONO	1	48	0	71	0.408333
OR5L2	1	48	0	71	0.408333
OR8H1	1	48	0	71	0.408333
OR8H2	1	48	0	71	0.408333
OR8K1	1	48	0	71	0.408333
PALB2	1	48	0	71	0.408333
PCDHA1	1	48	0	71	0.408333
PCDHA12	1	48	0	71	0.408333
PCDHA13	1	48	0	71	0.408333
PCDHA2	1	48	0	71	0.408333
PCDHB12	1	48	0	71	0.408333
PHIP	1	48	0	71	0.408333
PHKB	1	48	0	71	0.408333
PHLPP2	1	48	0	71	0.408333
PIK3C2B	1	48	0	71	0.408333
PIK3R1	1	48	0	71	0.408333
PIK3R2	1	48	0	71	0.408333
PLAG1	1	48	0	71	0.408333
PMS2	1	48	0	71	0.408333
PPP1R9A	1	48	0	71	0.408333
PRDM11	1	48	0	71	0.408333
PRDM7	1	48	0	71	0.408333
PROKR2	1	48	0	71	0.408333
PRR21	1	48	0	71	0.408333
PTEN	1	48	0	71	0.408333
RAD51L1	1	48	0	71	0.408333
RBM15	1	48	0	71	0.408333
RUFY1	1	48	0	71	0.408333
SALL1	1	48	0	71	0.408333
SFMBT2	1	48	0	71	0.408333
SMO	1	48	0	71	0.408333
SPTLC2	1	48	0	71	0.408333
STAT3	1	48	0	71	0.408333
TDRD3	1	48	0	71	0.408333
TPM3	1	48	0	71	0.408333
TRIP11	1	48	0	71	0.408333
TSC2	1	48	0	71	0.408333
UBE3A	1	48	0	71	0.408333
UBE4A	1	48	0	71	0.408333
WHSC1L1	1	48	0	71	0.408333
XPC	1	48	0	71	0.408333
ZNF19	1	48	0	71	0.408333
ZNF433	1	48	0	71	0.408333
ZNF440	1	48	0	71	0.408333
ZNF699	1	48	0	71	0.408333
ZNF804B	4	45	3	68	0.441685
CDH9	2	47	6	65	0.469517
PCDH15	2	47	6	65	0.469517
ABAT	0	49	2	69	0.512745
ARHGAP30	0	49	2	69	0.512745
ARID1A	0	49	2	69	0.512745
BAGE2	0	49	2	69	0.512745
CARD11	0	49	2	69	0.512745
CDH11	0	49	2	69	0.512745
COQ3	0	49	2	69	0.512745
DOK6	0	49	2	69	0.512745
EBF1	0	49	2	69	0.512745
EFCAB6	0	49	2	69	0.512745
EGFR	0	49	2	69	0.512745
FANCA	0	49	2	69	0.512745
FSTL5	0	49	2	69	0.512745
GPR174	0	49	2	69	0.512745
IRF6	0	49	2	69	0.512745
KCTD8	0	49	2	69	0.512745
KIAA1468	0	49	2	69	0.512745
LRRTM1	0	49	2	69	0.512745
MYH2	0	49	2	69	0.512745
MYH9	0	49	2	69	0.512745
NLRP4	0	49	2	69	0.512745
NUMA1	0	49	2	69	0.512745
NUP214	0	49	2	69	0.512745
PKP4	0	49	2	69	0.512745
PRKCA	0	49	2	69	0.512745
PZP	0	49	2	69	0.512745
RIMS2	0	49	2	69	0.512745
RXFP3	0	49	2	69	0.512745
SETBP1	0	49	2	69	0.512745
SLCO5A1	0	49	2	69	0.512745
USP26	0	49	2	69	0.512745
VWA5A	0	49	2	69	0.512745
WBSCR17	0	49	2	69	0.512745
XRCC6	0	49	2	69	0.512745
ZNF799	0	49	2	69	0.512745
HUWE1	3	46	7	64	0.524658
SI	3	46	7	64	0.524658
ABCA12	2	47	1	70	0.566426
ASXL1	2	47	1	70	0.566426
CTNND2	2	47	1	70	0.566426
DSPP	2	47	1	70	0.566426
EZH2	2	47	1	70	0.566426
GAS7	2	47	1	70	0.566426
KDR	2	47	1	70	0.566426
NRG2	2	47	1	70	0.566426
PCDHB11	2	47	1	70	0.566426
PLEC	2	47	1	70	0.566426
RGAG1	2	47	1	70	0.566426
STAT1	2	47	1	70	0.566426
TET2	2	47	1	70	0.566426
TPP2	2	47	1	70	0.566426
ZFHX4	5	44	11	60	0.585937
NOTCH1	5	44	10	61	0.586655
ABCD2	1	48	3	68	0.644247
BRCA2	1	48	3	68	0.644247
COL6A3	1	48	3	68	0.644247
DSCAM	1	48	3	68	0.644247
FAM135B	1	48	3	68	0.644247
GRM8	1	48	3	68	0.644247
INPP4A	1	48	3	68	0.644247
KEAP1	1	48	3	68	0.644247
MYH13	1	48	3	68	0.644247
NOTCH3	1	48	3	68	0.644247
PKD1L1	1	48	3	68	0.644247
RIPK4	1	48	3	68	0.644247
ROS1	1	48	3	68	0.644247
MACF1	1	48	4	67	0.647314
PIK3C2G	1	48	4	67	0.647314
CSMD3	9	40	16	55	0.651953
EP300	3	46	3	68	0.687182
THSD7A	3	46	3	68	0.687182
TPRX1	3	46	3	68	0.687182
CDH12	2	47	5	66	0.699073
COL11A1	2	47	5	66	0.699073
FAT2	2	47	5	66	0.699073
NSD1	2	47	5	66	0.699073
RB1CC1	2	47	5	66	0.699073
ADAMTS12	4	45	4	67	0.714519
LRP1B	4	45	8	63	0.759463
FAT1	7	42	8	63	0.779849
CYLD	2	47	2	69	1
DDX3X	2	47	2	69	1
DSEL	2	47	2	69	1
EPHA2	2	47	2	69	1
HRAS	2	47	2	69	1
INPP4B	2	47	2	69	1
KRAS	2	47	2	69	1
LRFN5	2	47	2	69	1
MAML3	2	47	2	69	1
MUC2	2	47	2	69	1
ODZ1	2	47	2	69	1
PLCB1	2	47	2	69	1
TMEM132D	2	47	2	69	1
UNC5D	2	47	2	69	1
USH2A	5	44	8	63	1
ABCA4	1	48	1	70	1
ABCA6	1	48	1	70	1
ABCA9	1	48	1	70	1
ABHD13	0	49	1	70	1
ABL2	1	48	1	70	1
ACACB	0	49	1	70	1
ADAMTSL1	0	49	1	70	1
ADCY1	0	49	1	70	1
AIM1	0	49	1	70	1
AKAP1	0	49	1	70	1
AKT1	0	49	1	70	1
ANKRD17	0	49	1	70	1
ANO4	0	49	1	70	1
APC	1	48	1	70	1
ASH1L	2	47	4	67	1
ATM	0	49	1	70	1
ATXN1	0	49	1	70	1
B2M	0	49	1	70	1
BAZ1B	0	49	1	70	1
BCL9	0	49	1	70	1
BRD4	0	49	1	70	1
BRIP1	1	48	1	70	1
BTBD12	1	48	1	70	1
C1orf173	2	47	3	68	1
CABIN1	0	49	1	70	1
CASP8	1	48	2	69	1
CCR2	0	49	1	70	1
CCR5	0	49	1	70	1
CD248	0	49	1	70	1
CD8A	0	49	1	70	1
CELSR3	1	48	2	69	1
CHD5	0	49	1	70	1
CNGA3	0	49	1	70	1
CNTN6	2	47	3	68	1
CREBBP	1	48	1	70	1
CUBN	2	47	4	67	1
CYP26A1	0	49	1	70	1
DCC	0	49	1	70	1
DNAH3	2	47	3	68	1
DST	1	48	1	70	1
DUSP5	0	49	1	70	1
DYRK1B	0	49	1	70	1
E2F3	0	49	1	70	1
E2F7	1	48	1	70	1
ENPP2	0	49	1	70	1
EP400	0	49	1	70	1
EPHA1	0	49	1	70	1
EPHB3	0	49	1	70	1
EPM2AIP1	0	49	1	70	1
ERBB3	0	49	1	70	1
ETV5	0	49	1	70	1
ETV6	0	49	1	70	1
EWSR1	0	49	1	70	1
FAM5B	0	49	1	70	1
FANCD2	1	48	1	70	1
FANCG	0	49	1	70	1
FANCM	0	49	1	70	1
FBXW7	2	47	4	67	1
FGFR1	0	49	1	70	1
FGFR2	1	48	1	70	1
FGFR3	3	46	4	67	1
FLT3	1	48	1	70	1
FOXP1	0	49	1	70	1
GMPS	0	49	1	70	1
GNAQ	0	49	1	70	1
GPC5	1	48	2	69	1
HBS1L	0	49	0	71	1
HLA-A	0	49	1	70	1
HLA-B	0	49	1	70	1
HYDIN	1	48	2	69	1
IL6ST	0	49	1	70	1
INO80	0	49	1	70	1
INPP5D	0	49	1	70	1
JAK2	1	48	1	70	1
KIAA2022	1	48	1	70	1
KIT	0	49	1	70	1
KRTAP4-3	0	49	1	70	1
KRTAP6-3	0	49	1	70	1
LAMB1	0	49	1	70	1
LILRA5	0	49	1	70	1
LILRB1	0	49	1	70	1
LILRB2	0	49	1	70	1
LOC200030	0	49	1	70	1
LOC642587	0	49	1	70	1
LRRC37B	0	49	1	70	1
LRRTM3	0	49	1	70	1
LTBP1	0	49	1	70	1
MAP2	2	47	3	68	1
MAP3K1	0	49	1	70	1
MCOLN2	0	49	1	70	1
MECOM	0	49	1	70	1
MEF2C	1	48	1	70	1
MKL1	0	49	1	70	1
MLLT10	0	49	1	70	1
MST1R	0	49	1	70	1
MTOR	3	46	4	67	1
MX2	0	49	1	70	1
MYC	0	49	1	70	1
MYH1	1	48	2	69	1
MYH11	1	48	1	70	1
MYH4	1	48	1	70	1
NACA2	0	49	1	70	1
NAV3	2	47	3	68	1
NBPF1	1	48	1	70	1
NBPF3	0	49	1	70	1
NCOR1	1	48	2	69	1
NECAB1	0	49	1	70	1
NF1	2	47	3	68	1
NFE2L2	1	48	2	69	1
NKAP	0	49	1	70	1
NKAPL	1	48	2	69	1
NLRP12	0	49	1	70	1
NOTCH2	2	47	3	68	1
NRAP	1	48	1	70	1
NRAS	0	49	1	70	1
NRK	1	48	1	70	1
NRXN3	1	48	1	70	1
NTRK3	0	49	1	70	1
OR4C15	0	49	1	70	1
OR51S1	0	49	1	70	1
PARK2	0	49	1	70	1
PBRM1	1	48	2	69	1
PCDH17	0	49	1	70	1
PCDHA6	0	49	1	70	1
PCDHAC2	0	49	1	70	1
PCDHB4	0	49	1	70	1
PCLO	3	46	5	66	1
PCM1	0	49	1	70	1
PDE3A	2	47	3	68	1
PDE4DIP	2	47	4	67	1
PDGFRA	0	49	1	70	1
PHKA2	0	49	1	70	1
PHLPP1	1	48	2	69	1
PIK3C2A	0	49	1	70	1
PLIN5	0	49	1	70	1
PLXNA1	0	49	1	70	1
PMS1	1	48	2	69	1
POLQ	2	47	3	68	1
PPP4R4	1	48	1	70	1
PRDM9	1	48	1	70	1
PTK6	0	49	0	71	1
RANBP17	0	49	1	70	1
RARG	0	49	1	70	1
RASA1	1	48	2	69	1
RECQL4	0	49	1	70	1
RELN	2	47	3	68	1
RIMBP2	0	49	1	70	1
RUNX1	0	49	1	70	1
SBDS	0	49	1	70	1
SETD2	0	49	1	70	1
SFRS14	1	48	1	70	1
SLC2A13	1	48	1	70	1
SMAD1	0	49	1	70	1
SMAD4	0	49	1	70	1
SMARCA4	0	49	1	70	1
SMC6	0	49	1	70	1
SPAG17	1	48	2	69	1
SPTBN4	0	49	1	70	1
SRGAP3	0	49	1	70	1
STYK1	0	49	1	70	1
SYNE2	4	45	6	65	1
TAP2	1	48	1	70	1
TEX15	1	48	1	70	1
TGFBR2	1	48	2	69	1
TNFAIP3	0	49	1	70	1
TRAF3	1	48	1	70	1
TRIO	1	48	1	70	1
TRRAP	1	48	2	69	1
UBR5	3	46	5	66	1
USP6	0	49	1	70	1
VPS41	1	48	1	70	1
WDR63	1	48	1	70	1
WHSC1	0	49	1	70	1
WRN	1	48	1	70	1
WT1	0	49	1	70	1
YTHDC1	1	48	1	70	1
ZEB2	1	48	1	70	1
ZNF180	0	49	1	70	1
ZNF217	0	49	1	70	1
ZNF426	0	49	1	70	1
ZNF439	0	49	1	70	1
ZNF443	0	49	1	70	1
ZNF461	0	49	1	70	1
ZNF501	0	49	1	70	1
ZNF534	0	49	1	70	1
ZNF571	0	49	1	70	1
ZNF665	0	49	1	70	1
ZNF761	0	49	1	70	1
ZNF790	1	48	1	70	1
ZNF823	0	49	1	70	1
ZNF83	0	49	1	70	1
Supplementary Table S2(C).2 Mutation event difference between drinkers and non-drinkers in oropharynx tumor samples
Gene Name	Mutation Event in Non-drinker+light-drinker	No Mutation Event in Non-drinker+light-drinker	Mutation Event in Heavy-drinker	No Mutation Event in Heavy-drinker	P Value
DNAH5	3	24	0	40	0.0610583
MLL3	3	24	0	40	0.0610583
RB1	3	24	0	40	0.0610583
THSD7A	3	24	0	40	0.0610583
SYNE1	1	26	7	33	0.130154
CDH9	0	27	4	36	0.14213
CDKN2A	0	27	4	36	0.14213
MTOR	0	27	4	36	0.14213
PAK7	0	27	4	36	0.14213
ZNF521	0	27	4	36	0.14213
CRIPAK	2	25	0	40	0.158752
DDR2	2	25	0	40	0.158752
DSPP	2	25	0	40	0.158752
NLRP11	2	25	0	40	0.158752
PCDHA8	2	25	0	40	0.158752
PIK3C3	2	25	0	40	0.158752
SLC26A3	2	25	0	40	0.158752
PIK3CA	8	19	6	34	0.220623
TP53	4	23	12	28	0.242647
BBX	0	27	3	37	0.2673
CDH12	0	27	3	37	0.2673
PKD1L1	0	27	3	37	0.2673
PKHD1L1	0	27	3	37	0.2673
POLQ	0	27	3	37	0.2673
REST	0	27	3	37	0.2673
TFRC	0	27	3	37	0.2673
AHNAK	3	24	1	39	0.294776
EP300	3	24	2	38	0.385419
BIRC3	1	26	0	40	0.402985
BLM	1	26	0	40	0.402985
C1orf173	1	26	0	40	0.402985
CBL	1	26	0	40	0.402985
CDH1	1	26	0	40	0.402985
CDH10	1	26	0	40	0.402985
CLCN4	1	26	0	40	0.402985
CLSTN2	1	26	0	40	0.402985
CNTNAP2	1	26	0	40	0.402985
DCT	1	26	0	40	0.402985
EPHB1	1	26	0	40	0.402985
ERAS	1	26	0	40	0.402985
ERBB4	1	26	0	40	0.402985
FARP2	1	26	0	40	0.402985
FAT4	1	26	0	40	0.402985
FGFR4	1	26	0	40	0.402985
FLG2	1	26	0	40	0.402985
FLT3	1	26	0	40	0.402985
HSCB	1	26	0	40	0.402985
INCENP	1	26	0	40	0.402985
INPP4B	1	26	0	40	0.402985
KDM5A	1	26	0	40	0.402985
KIAA1549	1	26	0	40	0.402985
LILRA3	1	26	0	40	0.402985
MDM2	1	26	0	40	0.402985
MED1	1	26	0	40	0.402985
MMP16	1	26	0	40	0.402985
MTA2	1	26	0	40	0.402985
MYH6	1	26	0	40	0.402985
MYH7	1	26	0	40	0.402985
MYH7B	1	26	0	40	0.402985
NONO	1	26	0	40	0.402985
OR8H1	1	26	0	40	0.402985
PALB2	1	26	0	40	0.402985
PCDHA1	1	26	0	40	0.402985
PCDHA12	1	26	0	40	0.402985
PCDHA13	1	26	0	40	0.402985
PHIP	1	26	0	40	0.402985
PIK3CB	1	26	0	40	0.402985
PIK3CG	1	26	0	40	0.402985
PIK3R2	1	26	0	40	0.402985
PMS2	1	26	0	40	0.402985
PPP1R9A	1	26	0	40	0.402985
PPP4R4	1	26	0	40	0.402985
PRR21	1	26	0	40	0.402985
RAD51L1	1	26	0	40	0.402985
RBM15	1	26	0	40	0.402985
RUFY1	1	26	0	40	0.402985
SLITRK3	1	26	0	40	0.402985
SRPK2	1	26	0	40	0.402985
TDRD3	1	26	0	40	0.402985
TET2	1	26	0	40	0.402985
TRAF3	1	26	0	40	0.402985
TRIP11	1	26	0	40	0.402985
TSC2	1	26	0	40	0.402985
UNC5D	1	26	0	40	0.402985
YTHDC1	1	26	0	40	0.402985
ZNF699	1	26	0	40	0.402985
TTN	11	16	12	28	0.435497
NOTCH1	2	25	6	34	0.459005
ABAT	0	27	2	38	0.511533
APOB	0	27	2	38	0.511533
COL6A3	0	27	2	38	0.511533
DICER1	0	27	2	38	0.511533
DSCAM	0	27	2	38	0.511533
EFCAB6	0	27	2	38	0.511533
HYDIN	0	27	2	38	0.511533
MACF1	0	27	2	38	0.511533
MYH2	0	27	2	38	0.511533
NKAPL	0	27	2	38	0.511533
NOTCH3	0	27	2	38	0.511533
NUP214	0	27	2	38	0.511533
PBRM1	0	27	2	38	0.511533
PDE3A	0	27	2	38	0.511533
PMS1	0	27	2	38	0.511533
PRKCA	0	27	2	38	0.511533
PTPRF	0	27	2	38	0.511533
RXFP3	0	27	2	38	0.511533
TGFBR2	0	27	2	38	0.511533
TP63	0	27	2	38	0.511533
TSC1	0	27	2	38	0.511533
CTNND2	2	25	1	39	0.56038
CYLD	2	25	1	39	0.56038
EPHA7	2	25	1	39	0.56038
SPTA1	2	25	1	39	0.56038
STAT1	2	25	1	39	0.56038
ASH1L	1	26	4	36	0.640919
COL11A1	1	26	4	36	0.640919
SI	1	26	4	36	0.640919
ABCD2	1	26	3	37	0.642809
BRCA2	1	26	3	37	0.642809
CUBN	1	26	3	37	0.642809
DNAH3	1	26	3	37	0.642809
LRP1B	1	26	3	37	0.642809
MYH8	1	26	3	37	0.642809
PCDH15	1	26	3	37	0.642809
PCLO	1	26	3	37	0.642809
PDE4DIP	1	26	3	37	0.642809
HUWE1	2	25	5	35	0.692616
FAT1	4	23	4	36	0.704912
MLL2	3	24	7	33	0.728367
FLG	3	24	6	34	0.729919
CSMD3	4	23	8	32	0.749024
ABCA12	0	27	0	40	1
ABCA4	0	27	0	40	1
ABCA6	0	27	0	40	1
ABCA9	0	27	1	39	1
ABHD13	0	27	1	39	1
ABL2	0	27	1	39	1
ACACB	0	27	1	39	1
ADAMTS12	2	25	2	38	1
ADAMTSL1	0	27	1	39	1
ADCY1	0	27	0	40	1
AIM1	0	27	0	40	1
AKAP1	0	27	0	40	1
AKT1	0	27	0	40	1
AKT3	0	27	0	40	1
AMD1	0	27	0	40	1
ANKHD1-EIF4EBP3	0	27	0	40	1
ANKRD17	0	27	1	39	1
ANO4	0	27	1	39	1
APC	0	27	0	40	1
ARFGEF2	0	27	0	40	1
ARHGAP30	0	27	1	39	1
ARID1A	0	27	1	39	1
ASXL1	1	26	1	39	1
ATM	0	27	0	40	1
ATXN1	0	27	1	39	1
B2M	0	27	1	39	1
BAGE2	0	27	1	39	1
BAZ1B	0	27	1	39	1
BBS9	0	27	0	40	1
BCL9	0	27	1	39	1
BRCA1	0	27	0	40	1
BRD4	0	27	0	40	1
BRIP1	1	26	1	39	1
BTBD12	1	26	1	39	1
BZRAP1	0	27	0	40	1
CABIN1	0	27	1	39	1
CARD11	0	27	1	39	1
CASP8	0	27	1	39	1
CCNA1	0	27	0	40	1
CCR2	0	27	0	40	1
CCR5	0	27	1	39	1
CD248	0	27	0	40	1
CD8A	0	27	1	39	1
CDH11	0	27	1	39	1
CELSR3	0	27	0	40	1
CHD5	0	27	1	39	1
CNGA3	0	27	0	40	1
CNTN6	1	26	2	38	1
COL22A1	0	27	0	40	1
COQ3	0	27	1	39	1
CREBBP	0	27	1	39	1
CTNNB1	0	27	0	40	1
CUL3	0	27	1	39	1
CYP26A1	0	27	1	39	1
DCC	0	27	0	40	1
DDX3X	1	26	2	38	1
DGKG	0	27	0	40	1
DOK6	0	27	1	39	1
DPYS	0	27	0	40	1
DSEL	1	26	1	39	1
DST	0	27	1	39	1
DUSP5	0	27	1	39	1
DYRK1B	0	27	0	40	1
E2F3	0	27	0	40	1
E2F7	0	27	1	39	1
EBF1	0	27	1	39	1
EGFR	0	27	1	39	1
ENPP2	0	27	0	40	1
EP400	0	27	1	39	1
EPHA1	0	27	1	39	1
EPHA2	1	26	1	39	1
EPHA3	0	27	0	40	1
EPHB3	0	27	1	39	1
EPM2AIP1	0	27	1	39	1
EPS8	0	27	0	40	1
ERBB3	0	27	1	39	1
ETV5	0	27	0	40	1
ETV6	0	27	1	39	1
EWSR1	0	27	1	39	1
EZH2	1	26	1	39	1
FAM135B	0	27	1	39	1
FAM179B	0	27	1	39	1
FAM5B	0	27	0	40	1
FANCA	0	27	1	39	1
FANCD2	1	26	1	39	1
FANCG	0	27	1	39	1
FANCM	0	27	0	40	1
FAT2	1	26	2	38	1
FBXW7	1	26	2	38	1
FGFR1	0	27	0	40	1
FGFR2	1	26	1	39	1
FGFR3	2	25	4	36	1
FOXP1	0	27	0	40	1
FSTL5	0	27	1	39	1
GABRB3	0	27	0	40	1
GAS7	1	26	1	39	1
GC	0	27	0	40	1
GMPS	0	27	1	39	1
GNAQ	0	27	0	40	1
GPC5	1	26	2	38	1
GPR174	0	27	1	39	1
GRM8	1	26	1	39	1
HBS1L	0	27	0	40	1
HDX	0	27	0	40	1
HERC2	0	27	0	40	1
HLA-A	0	27	1	39	1
HLA-B	0	27	0	40	1
HRAS	1	26	1	39	1
IL6ST	0	27	0	40	1
INO80	0	27	1	39	1
INPP4A	1	26	2	38	1
INPP5D	0	27	1	39	1
INTS3	0	27	0	40	1
IRF6	0	27	1	39	1
ITK	0	27	0	40	1
JAK1	0	27	0	40	1
JAK2	0	27	1	39	1
KCTD8	0	27	1	39	1
KDR	0	27	0	40	1
KEAP1	0	27	0	40	1
KIAA1468	0	27	1	39	1
KIAA2022	0	27	1	39	1
KIT	0	27	0	40	1
KRAS	2	25	2	38	1
KRT10	0	27	0	40	1
KRTAP4-3	0	27	1	39	1
KRTAP6-3	0	27	1	39	1
LAMB1	0	27	1	39	1
LILRA5	0	27	1	39	1
LILRB1	0	27	1	39	1
LILRB2	0	27	1	39	1
LOC200030	0	27	1	39	1
LOC642587	0	27	1	39	1
LRFN5	1	26	1	39	1
LRRC37B	0	27	1	39	1
LRRK2	0	27	0	40	1
LRRTM1	0	27	1	39	1
LRRTM3	0	27	0	40	1
LTBP1	0	27	0	40	1
MAML3	1	26	2	38	1
MAP2	0	27	1	39	1
MAP3K1	0	27	0	40	1
MCOLN2	0	27	1	39	1
MECOM	0	27	0	40	1
MEF2C	0	27	1	39	1
MKL1	0	27	1	39	1
MLF1	0	27	0	40	1
MLLT10	0	27	1	39	1
MST1R	0	27	0	40	1
MUC2	1	26	2	38	1
MUC21	0	27	0	40	1
MX2	0	27	1	39	1
MYC	0	27	1	39	1
MYH1	0	27	1	39	1
MYH11	0	27	0	40	1
MYH13	0	27	1	39	1
MYH4	0	27	1	39	1
MYH9	0	27	1	39	1
NACA2	0	27	0	40	1
NAV3	0	27	1	39	1
NBPF1	0	27	1	39	1
NBPF3	0	27	1	39	1
NCOA3	0	27	0	40	1
NCOR1	0	27	1	39	1
NECAB1	0	27	1	39	1
NELL2	0	27	0	40	1
NF1	1	26	2	38	1
NF2	0	27	0	40	1
NFATC3	0	27	0	40	1
NFE2L2	1	26	2	38	1
NKAP	0	27	1	39	1
NLRP12	0	27	0	40	1
NLRP4	0	27	0	40	1
NOTCH2	0	27	1	39	1
NRAP	0	27	0	40	1
NRAS	0	27	1	39	1
NRG2	1	26	1	39	1
NRK	1	26	1	39	1
NRXN3	0	27	1	39	1
NSD1	0	27	1	39	1
NTRK3	0	27	0	40	1
NUMA1	0	27	1	39	1
ODZ1	0	27	1	39	1
OR4C15	0	27	0	40	1
OR51S1	0	27	0	40	1
OR5L2	0	27	0	40	1
OR8H2	0	27	0	40	1
OR8K1	0	27	0	40	1
PARK2	0	27	1	39	1
PCDH17	0	27	1	39	1
PCDHA2	0	27	0	40	1
PCDHA6	0	27	0	40	1
PCDHAC2	0	27	0	40	1
PCDHB11	0	27	1	39	1
PCDHB12	0	27	0	40	1
PCDHB4	0	27	1	39	1
PCM1	0	27	1	39	1
PDGFRA	0	27	1	39	1
PEG3	1	26	2	38	1
PHKA2	0	27	1	39	1
PHKB	0	27	0	40	1
PHLPP1	1	26	2	38	1
PHLPP2	0	27	0	40	1
PIK3C2A	0	27	1	39	1
PIK3C2B	0	27	0	40	1
PIK3C2G	0	27	1	39	1
PIK3R1	0	27	0	40	1
PKHD1	1	26	1	39	1
PKP4	0	27	1	39	1
PLAG1	0	27	0	40	1
PLCB1	1	26	2	38	1
PLEC	1	26	1	39	1
PLIN5	0	27	1	39	1
PLXNA1	0	27	0	40	1
PRDM11	0	27	0	40	1
PRDM7	0	27	0	40	1
PRDM9	0	27	0	40	1
PROKR2	0	27	0	40	1
PTEN	0	27	0	40	1
PTK6	0	27	0	40	1
PZP	0	27	0	40	1
RANBP17	0	27	0	40	1
RARG	0	27	1	39	1
RASA1	0	27	1	39	1
RB1CC1	1	26	2	38	1
RECQL4	0	27	1	39	1
RELN	0	27	0	40	1
RGAG1	1	26	1	39	1
RIMBP2	0	27	0	40	1
RIMS2	0	27	1	39	1
RIPK4	1	26	1	39	1
ROS1	0	27	1	39	1
RUNX1	0	27	1	39	1
SALL1	0	27	0	40	1
SBDS	0	27	1	39	1
SETBP1	0	27	0	40	1
SETD2	0	27	1	39	1
SFMBT2	0	27	0	40	1
SFRS14	0	27	1	39	1
SLC2A13	0	27	0	40	1
SLCO5A1	0	27	0	40	1
SMAD1	0	27	1	39	1
SMAD4	0	27	0	40	1
SMARCA4	0	27	0	40	1
SMC6	0	27	0	40	1
SMO	0	27	0	40	1
SPAG17	1	26	2	38	1
SPTBN4	0	27	1	39	1
SPTLC2	0	27	0	40	1
SRGAP3	0	27	1	39	1
STAT3	0	27	0	40	1
STYK1	0	27	0	40	1
SYNE2	2	25	4	36	1
TAP2	1	26	1	39	1
TEX15	1	26	1	39	1
TMEM132D	0	27	1	39	1
TNFAIP3	0	27	1	39	1
TPM3	0	27	0	40	1
TPP2	1	26	1	39	1
TPRX1	2	25	2	38	1
TRIO	0	27	1	39	1
TRRAP	1	26	2	38	1
UBE3A	0	27	0	40	1
UBE4A	0	27	0	40	1
UBR5	3	24	5	35	1
USH2A	2	25	3	37	1
USP26	0	27	1	39	1
USP6	0	27	1	39	1
VPS41	0	27	1	39	1
VWA5A	0	27	0	40	1
WBSCR17	0	27	1	39	1
WDR63	0	27	0	40	1
WHSC1	0	27	0	40	1
WHSC1L1	0	27	0	40	1
WRN	0	27	1	39	1
WT1	0	27	1	39	1
XPC	0	27	0	40	1
XRCC6	0	27	1	39	1
ZEB2	0	27	0	40	1
ZFHX4	3	24	4	36	1
ZNF180	0	27	0	40	1
ZNF19	0	27	0	40	1
ZNF217	0	27	1	39	1
ZNF426	0	27	1	39	1
ZNF433	0	27	0	40	1
ZNF439	0	27	1	39	1
ZNF440	0	27	0	40	1
ZNF443	0	27	0	40	1
ZNF461	0	27	1	39	1
ZNF501	0	27	1	39	1
ZNF534	0	27	0	40	1
ZNF571	0	27	0	40	1
ZNF665	0	27	1	39	1
ZNF761	0	27	0	40	1
ZNF790	0	27	1	39	1
ZNF799	0	27	1	39	1
ZNF804B	1	26	2	38	1
ZNF823	0	27	0	40	1
ZNF83	0	27	1	39	1
Supplementary Table S2(C).3 Mutation event difference between drinkers and non-drinkers in HPV+ tumor samples
Gene Name	Mutation Event in Non-drinker+light-drinker	No Mutation Event in Non-drinker+light-drinker	Mutation Event in Heavy-drinker	No Mutation Event in Heavy-drinker	P Value
SYNE1	1	25	5	20	0.0993206
DNAH5	4	22	0	25	0.110444
MLL3	4	22	0	25	0.110444
BBX	0	26	3	22	0.110444
REST	0	26	3	22	0.110444
TFRC	0	26	3	22	0.110444
TTN	10	16	5	20	0.220316
EPHA7	3	23	0	25	0.235294
PIK3C3	3	23	0	25	0.235294
RB1	3	23	0	25	0.235294
DSCAM	0	26	2	23	0.235294
NKAPL	0	26	2	23	0.235294
NUP214	0	26	2	23	0.235294
PAK7	0	26	2	23	0.235294
PKHD1L1	0	26	2	23	0.235294
PLCB1	0	26	2	23	0.235294
PRKCA	0	26	2	23	0.235294
TGFBR2	0	26	2	23	0.235294
TP63	0	26	2	23	0.235294
ZNF521	0	26	2	23	0.235294
ADAMTS12	4	22	1	24	0.34974
CSMD3	4	22	1	24	0.34974
CDH12	1	25	3	22	0.34974
DNAH3	1	25	3	22	0.34974
NOTCH1	1	25	3	22	0.34974
PCLO	1	25	3	22	0.34974
FLG	2	24	4	21	0.418917
CDH10	2	24	0	25	0.490196
CRIPAK	2	24	0	25	0.490196
FAT2	2	24	0	25	0.490196
FAT4	2	24	0	25	0.490196
FLG2	2	24	0	25	0.490196
KIAA1549	2	24	0	25	0.490196
LRFN5	2	24	0	25	0.490196
LRP1B	2	24	0	25	0.490196
NLRP11	2	24	0	25	0.490196
PKHD1	2	24	0	25	0.490196
RB1CC1	2	24	0	25	0.490196
SLC26A3	2	24	0	25	0.490196
THSD7A	2	24	0	25	0.490196
ABAT	0	26	1	24	0.490196
ABHD13	0	26	1	24	0.490196
ABL2	0	26	1	24	0.490196
ACACB	0	26	1	24	0.490196
ADAMTSL1	0	26	1	24	0.490196
ARHGAP30	0	26	1	24	0.490196
ARID1A	0	26	1	24	0.490196
B2M	0	26	1	24	0.490196
BAGE2	0	26	1	24	0.490196
BCL9	0	26	1	24	0.490196
CABIN1	0	26	1	24	0.490196
CASP8	0	26	1	24	0.490196
CD8A	0	26	1	24	0.490196
CDH11	0	26	1	24	0.490196
CHD5	0	26	1	24	0.490196
COQ3	0	26	1	24	0.490196
CYP26A1	0	26	1	24	0.490196
DUSP5	0	26	1	24	0.490196
EBF1	0	26	1	24	0.490196
EFCAB6	0	26	1	24	0.490196
EP400	0	26	1	24	0.490196
EPHB3	0	26	1	24	0.490196
ERBB3	0	26	1	24	0.490196
ETV6	0	26	1	24	0.490196
EWSR1	0	26	1	24	0.490196
FAM179B	0	26	1	24	0.490196
FAM5B	0	26	1	24	0.490196
FANCA	0	26	1	24	0.490196
FANCG	0	26	1	24	0.490196
FSTL5	0	26	1	24	0.490196
GPR174	0	26	1	24	0.490196
HLA-A	0	26	1	24	0.490196
HLA-B	0	26	1	24	0.490196
HYDIN	0	26	1	24	0.490196
INO80	0	26	1	24	0.490196
INPP5D	0	26	1	24	0.490196
IRF6	0	26	1	24	0.490196
JAK2	0	26	1	24	0.490196
KCTD8	0	26	1	24	0.490196
KIAA1468	0	26	1	24	0.490196
KIAA2022	0	26	1	24	0.490196
KRTAP4-3	0	26	1	24	0.490196
LAMB1	0	26	1	24	0.490196
LILRA5	0	26	1	24	0.490196
LOC200030	0	26	1	24	0.490196
LOC642587	0	26	1	24	0.490196
LRRC37B	0	26	1	24	0.490196
MACF1	0	26	1	24	0.490196
MCOLN2	0	26	1	24	0.490196
MKL1	0	26	1	24	0.490196
MLLT10	0	26	1	24	0.490196
MX2	0	26	1	24	0.490196
MYC	0	26	1	24	0.490196
MYH1	0	26	1	24	0.490196
MYH13	0	26	1	24	0.490196
MYH2	0	26	1	24	0.490196
MYH9	0	26	1	24	0.490196
NBPF3	0	26	1	24	0.490196
NCOR1	0	26	1	24	0.490196
NKAP	0	26	1	24	0.490196
NRXN3	0	26	1	24	0.490196
NSD1	0	26	1	24	0.490196
ODZ1	0	26	1	24	0.490196
PARK2	0	26	1	24	0.490196
PCDH17	0	26	1	24	0.490196
PCDHB11	0	26	1	24	0.490196
PDE3A	0	26	1	24	0.490196
PIK3C2A	0	26	1	24	0.490196
PKP4	0	26	1	24	0.490196
PMS1	0	26	1	24	0.490196
PTPRF	0	26	1	24	0.490196
RASA1	0	26	1	24	0.490196
RECQL4	0	26	1	24	0.490196
RIMS2	0	26	1	24	0.490196
RUNX1	0	26	1	24	0.490196
RXFP3	0	26	1	24	0.490196
SBDS	0	26	1	24	0.490196
SMAD1	0	26	1	24	0.490196
SPTBN4	0	26	1	24	0.490196
SRGAP3	0	26	1	24	0.490196
TMEM132D	0	26	1	24	0.490196
TNFAIP3	0	26	1	24	0.490196
TSC1	0	26	1	24	0.490196
USP26	0	26	1	24	0.490196
USP6	0	26	1	24	0.490196
VPS41	0	26	1	24	0.490196
WT1	0	26	1	24	0.490196
XRCC6	0	26	1	24	0.490196
ZNF217	0	26	1	24	0.490196
ZNF426	0	26	1	24	0.490196
ZNF461	0	26	1	24	0.490196
ZNF501	0	26	1	24	0.490196
ZNF665	0	26	1	24	0.490196
ZNF799	0	26	1	24	0.490196
ZNF83	0	26	1	24	0.490196
PIK3CA	7	19	4	21	0.498556
EP300	3	23	1	24	0.609844
ABCD2	1	25	2	23	0.609844
BRCA2	1	25	2	23	0.609844
COL6A3	1	25	2	23	0.609844
CUBN	1	25	2	23	0.609844
MUC2	1	25	2	23	0.609844
PKD1L1	1	25	2	23	0.609844
POLQ	1	25	2	23	0.609844
SI	1	25	2	23	0.609844
TPRX1	1	25	2	23	0.609844
TRRAP	1	25	2	23	0.609844
HUWE1	2	24	3	22	0.667952
MLL2	2	24	3	22	0.667952
FGFR3	3	23	4	21	0.703002
ABCA12	0	26	0	25	1
ABCA4	0	26	0	25	1
ABCA6	0	26	0	25	1
ABCA9	0	26	0	25	1
ADCY1	0	26	0	25	1
AHNAK	2	24	1	24	1
AIM1	0	26	0	25	1
AKAP1	0	26	0	25	1
AKT1	0	26	0	25	1
AKT3	0	26	0	25	1
AMD1	0	26	0	25	1
ANKHD1-EIF4EBP3	0	26	0	25	1
ANKRD17	0	26	0	25	1
ANO4	0	26	0	25	1
APC	1	25	0	25	1
APOB	1	25	1	24	1
ARFGEF2	1	25	0	25	1
ASH1L	2	24	2	23	1
ASXL1	1	25	1	24	1
ATM	0	26	0	25	1
ATXN1	0	26	0	25	1
BAZ1B	0	26	0	25	1
BBS9	1	25	0	25	1
BIRC3	1	25	0	25	1
BLM	1	25	0	25	1
BRCA1	1	25	0	25	1
BRD4	0	26	0	25	1
BRIP1	1	25	0	25	1
BTBD12	1	25	0	25	1
BZRAP1	0	26	0	25	1
C1orf173	1	25	0	25	1
CARD11	0	26	0	25	1
CBL	0	26	0	25	1
CCNA1	0	26	0	25	1
CCR2	0	26	0	25	1
CCR5	0	26	0	25	1
CD248	0	26	0	25	1
CDH1	1	25	0	25	1
CDH9	1	25	0	25	1
CDKN2A	0	26	0	25	1
CELSR3	1	25	0	25	1
CLCN4	1	25	0	25	1
CLSTN2	1	25	0	25	1
CNGA3	0	26	0	25	1
CNTN6	2	24	1	24	1
CNTNAP2	1	25	0	25	1
COL11A1	2	24	2	23	1
COL22A1	0	26	0	25	1
CREBBP	1	25	1	24	1
CTNNB1	0	26	0	25	1
CTNND2	2	24	1	24	1
CUL3	0	26	0	25	1
CYLD	2	24	1	24	1
DCC	0	26	0	25	1
DCT	1	25	0	25	1
DDR2	1	25	0	25	1
DDX3X	2	24	2	23	1
DGKG	0	26	0	25	1
DICER1	0	26	0	25	1
DOK6	0	26	0	25	1
DPYS	0	26	0	25	1
DSEL	2	24	1	24	1
DSPP	1	25	0	25	1
DST	1	25	0	25	1
DYRK1B	0	26	0	25	1
E2F3	0	26	0	25	1
E2F7	1	25	1	24	1
EGFR	0	26	0	25	1
ENPP2	0	26	0	25	1
EPHA1	0	26	0	25	1
EPHA2	1	25	1	24	1
EPHA3	0	26	0	25	1
EPHB1	1	25	0	25	1
EPM2AIP1	0	26	0	25	1
EPS8	0	26	0	25	1
ERAS	1	25	0	25	1
ERBB4	1	25	0	25	1
ETV5	0	26	0	25	1
EZH2	2	24	1	24	1
FAM135B	0	26	0	25	1
FANCD2	1	25	1	24	1
FANCM	0	26	0	25	1
FARP2	1	25	0	25	1
FAT1	4	22	3	22	1
FBXW7	1	25	1	24	1
FGFR1	0	26	0	25	1
FGFR2	1	25	1	24	1
FGFR4	1	25	0	25	1
FLT3	1	25	0	25	1
FOXP1	0	26	0	25	1
GABRB3	0	26	0	25	1
GAS7	1	25	1	24	1
GC	0	26	0	25	1
GMPS	0	26	0	25	1
GNAQ	0	26	0	25	1
GPC5	1	25	1	24	1
GRM8	1	25	1	24	1
HBS1L	0	26	0	25	1
HDX	0	26	0	25	1
HERC2	0	26	0	25	1
HRAS	1	25	1	24	1
HSCB	1	25	0	25	1
IL6ST	0	26	0	25	1
INCENP	1	25	0	25	1
INPP4A	1	25	1	24	1
INPP4B	1	25	0	25	1
INTS3	0	26	0	25	1
ITK	1	25	0	25	1
JAK1	1	25	0	25	1
KDM5A	1	25	0	25	1
KDR	1	25	0	25	1
KEAP1	0	26	0	25	1
KIT	0	26	0	25	1
KRAS	2	24	1	24	1
KRT10	1	25	0	25	1
KRTAP6-3	0	26	0	25	1
LILRA3	1	25	0	25	1
LILRB1	0	26	0	25	1
LILRB2	0	26	0	25	1
LRRK2	0	26	0	25	1
LRRTM1	0	26	0	25	1
LRRTM3	0	26	0	25	1
LTBP1	0	26	0	25	1
MAML3	1	25	1	24	1
MAP2	1	25	0	25	1
MAP3K1	0	26	0	25	1
MDM2	1	25	0	25	1
MECOM	0	26	0	25	1
MED1	1	25	0	25	1
MEF2C	0	26	0	25	1
MLF1	1	25	0	25	1
MMP16	1	25	0	25	1
MST1R	0	26	0	25	1
MTA2	0	26	0	25	1
MTOR	2	24	2	23	1
MUC21	0	26	0	25	1
MYH11	1	25	0	25	1
MYH4	1	25	1	24	1
MYH6	1	25	0	25	1
MYH7	1	25	0	25	1
MYH7B	1	25	0	25	1
MYH8	1	25	1	24	1
NACA2	0	26	0	25	1
NAV3	1	25	0	25	1
NBPF1	0	26	0	25	1
NCOA3	0	26	0	25	1
NECAB1	0	26	0	25	1
NELL2	1	25	0	25	1
NF1	2	24	1	24	1
NF2	0	26	0	25	1
NFATC3	0	26	0	25	1
NFE2L2	1	25	1	24	1
NLRP12	0	26	0	25	1
NLRP4	0	26	0	25	1
NONO	1	25	0	25	1
NOTCH2	0	26	0	25	1
NOTCH3	0	26	0	25	1
NRAP	1	25	0	25	1
NRAS	0	26	0	25	1
NRG2	1	25	1	24	1
NRK	1	25	1	24	1
NTRK3	0	26	0	25	1
NUMA1	0	26	0	25	1
OR4C15	0	26	0	25	1
OR51S1	0	26	0	25	1
OR5L2	0	26	0	25	1
OR8H1	0	26	0	25	1
OR8H2	0	26	0	25	1
OR8K1	1	25	0	25	1
PALB2	1	25	0	25	1
PBRM1	1	25	1	24	1
PCDH15	1	25	1	24	1
PCDHA1	1	25	0	25	1
PCDHA12	1	25	0	25	1
PCDHA13	1	25	0	25	1
PCDHA2	0	26	0	25	1
PCDHA6	0	26	0	25	1
PCDHA8	1	25	0	25	1
PCDHAC2	0	26	0	25	1
PCDHB12	0	26	0	25	1
PCDHB4	0	26	0	25	1
PCM1	0	26	0	25	1
PDE4DIP	1	25	1	24	1
PDGFRA	0	26	0	25	1
PEG3	3	23	2	23	1
PHIP	1	25	0	25	1
PHKA2	0	26	0	25	1
PHKB	0	26	0	25	1
PHLPP1	1	25	1	24	1
PHLPP2	1	25	0	25	1
PIK3C2B	0	26	0	25	1
PIK3C2G	0	26	0	25	1
PIK3CB	1	25	0	25	1
PIK3CG	0	26	0	25	1
PIK3R1	1	25	0	25	1
PIK3R2	1	25	0	25	1
PLAG1	1	25	0	25	1
PLEC	1	25	0	25	1
PLIN5	0	26	0	25	1
PLXNA1	0	26	0	25	1
PMS2	1	25	0	25	1
PPP1R9A	1	25	0	25	1
PPP4R4	1	25	0	25	1
PRDM11	0	26	0	25	1
PRDM7	1	25	0	25	1
PRDM9	0	26	0	25	1
PROKR2	0	26	0	25	1
PRR21	1	25	0	25	1
PTEN	0	26	0	25	1
PTK6	0	26	0	25	1
PZP	0	26	0	25	1
RAD51L1	1	25	0	25	1
RANBP17	0	26	0	25	1
RARG	0	26	0	25	1
RBM15	0	26	0	25	1
RELN	1	25	0	25	1
RGAG1	1	25	0	25	1
RIMBP2	0	26	0	25	1
RIPK4	1	25	1	24	1
ROS1	1	25	0	25	1
RUFY1	1	25	0	25	1
SALL1	0	26	0	25	1
SETBP1	0	26	0	25	1
SETD2	0	26	0	25	1
SFMBT2	0	26	0	25	1
SFRS14	0	26	0	25	1
SLC2A13	1	25	0	25	1
SLCO5A1	0	26	0	25	1
SLITRK3	1	25	0	25	1
SMAD4	0	26	0	25	1
SMARCA4	0	26	0	25	1
SMC6	0	26	0	25	1
SMO	1	25	0	25	1
SPAG17	1	25	1	24	1
SPTA1	1	25	0	25	1
SPTLC2	1	25	0	25	1
SRPK2	1	25	0	25	1
STAT1	2	24	1	24	1
STAT3	0	26	0	25	1
STYK1	0	26	0	25	1
SYNE2	2	24	2	23	1
TAP2	1	25	0	25	1
TDRD3	0	26	0	25	1
TET2	1	25	0	25	1
TEX15	1	25	1	24	1
TP53	1	25	1	24	1
TPM3	0	26	0	25	1
TPP2	1	25	1	24	1
TRAF3	1	25	1	24	1
TRIO	0	26	0	25	1
TRIP11	1	25	0	25	1
TSC2	1	25	0	25	1
UBE3A	1	25	0	25	1
UBE4A	1	25	0	25	1
UBR5	1	25	1	24	1
UNC5D	1	25	0	25	1
USH2A	2	24	1	24	1
VWA5A	0	26	0	25	1
WBSCR17	0	26	0	25	1
WDR63	0	26	0	25	1
WHSC1	0	26	0	25	1
WHSC1L1	0	26	0	25	1
WRN	0	26	0	25	1
XPC	0	26	0	25	1
YTHDC1	0	26	0	25	1
ZEB2	1	25	0	25	1
ZFHX4	3	23	3	22	1
ZNF180	0	26	0	25	1
ZNF19	0	26	0	25	1
ZNF433	0	26	0	25	1
ZNF439	0	26	0	25	1
ZNF440	0	26	0	25	1
ZNF443	0	26	0	25	1
ZNF534	0	26	0	25	1
ZNF571	0	26	0	25	1
ZNF699	0	26	0	25	1
ZNF761	0	26	0	25	1
ZNF790	1	25	0	25	1
ZNF804B	1	25	1	24	1
ZNF823	0	26	0	25	1
Supplementary Table S2(C).4 Mutation event difference between drinkers and non-drinkers in HPV+ oropharynx tumor samples
Gene Name	Mutation Event in Non-drinker+light-drinker	No Mutation Event in Non-drinker+light-drinker	Mutation Event in Heavy-drinker	No Mutation Event in Heavy-drinker	P Value
SYNE1	0	23	5	19	0.0496454
DNAH5	3	20	0	24	0.10922
MLL3	3	20	0	24	0.10922
RB1	3	20	0	24	0.10922
TTN	9	14	5	19	0.212385
CRIPAK	2	21	0	24	0.234043
EPHA7	2	21	0	24	0.234043
NLRP11	2	21	0	24	0.234043
PIK3C3	2	21	0	24	0.234043
THSD7A	2	21	0	24	0.234043
BBX	0	23	3	21	0.234043
CDH12	0	23	3	21	0.234043
PCLO	0	23	3	21	0.234043
REST	0	23	3	21	0.234043
TFRC	0	23	3	21	0.234043
PIK3CA	7	16	4	20	0.317659
CSMD3	3	20	1	23	0.347518
EP300	3	20	1	23	0.347518
BIRC3	1	22	0	24	0.489362
BLM	1	22	0	24	0.489362
BRIP1	1	22	0	24	0.489362
BTBD12	1	22	0	24	0.489362
C1orf173	1	22	0	24	0.489362
CDH1	1	22	0	24	0.489362
CDH10	1	22	0	24	0.489362
CLCN4	1	22	0	24	0.489362
CLSTN2	1	22	0	24	0.489362
CNTNAP2	1	22	0	24	0.489362
DCT	1	22	0	24	0.489362
DDR2	1	22	0	24	0.489362
DSPP	1	22	0	24	0.489362
EPHB1	1	22	0	24	0.489362
ERAS	1	22	0	24	0.489362
ERBB4	1	22	0	24	0.489362
FARP2	1	22	0	24	0.489362
FAT2	1	22	0	24	0.489362
FAT4	1	22	0	24	0.489362
FGFR4	1	22	0	24	0.489362
FLG2	1	22	0	24	0.489362
FLT3	1	22	0	24	0.489362
HSCB	1	22	0	24	0.489362
INCENP	1	22	0	24	0.489362
INPP4B	1	22	0	24	0.489362
KDM5A	1	22	0	24	0.489362
KIAA1549	1	22	0	24	0.489362
LILRA3	1	22	0	24	0.489362
LRFN5	1	22	0	24	0.489362
LRP1B	1	22	0	24	0.489362
MDM2	1	22	0	24	0.489362
MED1	1	22	0	24	0.489362
MMP16	1	22	0	24	0.489362
MYH6	1	22	0	24	0.489362
MYH7	1	22	0	24	0.489362
MYH7B	1	22	0	24	0.489362
NONO	1	22	0	24	0.489362
PALB2	1	22	0	24	0.489362
PCDHA1	1	22	0	24	0.489362
PCDHA12	1	22	0	24	0.489362
PCDHA13	1	22	0	24	0.489362
PCDHA8	1	22	0	24	0.489362
PHIP	1	22	0	24	0.489362
PIK3CB	1	22	0	24	0.489362
PIK3R2	1	22	0	24	0.489362
PKHD1	1	22	0	24	0.489362
PLEC	1	22	0	24	0.489362
PMS2	1	22	0	24	0.489362
PPP1R9A	1	22	0	24	0.489362
PPP4R4	1	22	0	24	0.489362
PRR21	1	22	0	24	0.489362
RAD51L1	1	22	0	24	0.489362
RB1CC1	1	22	0	24	0.489362
RGAG1	1	22	0	24	0.489362
RIPK4	1	22	0	24	0.489362
RUFY1	1	22	0	24	0.489362
SLC26A3	1	22	0	24	0.489362
SLITRK3	1	22	0	24	0.489362
SPTA1	1	22	0	24	0.489362
SRPK2	1	22	0	24	0.489362
TAP2	1	22	0	24	0.489362
TET2	1	22	0	24	0.489362
TRAF3	1	22	0	24	0.489362
TRIP11	1	22	0	24	0.489362
TSC2	1	22	0	24	0.489362
UNC5D	1	22	0	24	0.489362
COL6A3	0	23	2	22	0.489362
DSCAM	0	23	2	22	0.489362
MTOR	0	23	2	22	0.489362
NKAPL	0	23	2	22	0.489362
NUP214	0	23	2	22	0.489362
PAK7	0	23	2	22	0.489362
PKD1L1	0	23	2	22	0.489362
PKHD1L1	0	23	2	22	0.489362
PLCB1	0	23	2	22	0.489362
POLQ	0	23	2	22	0.489362
PRKCA	0	23	2	22	0.489362
TGFBR2	0	23	2	22	0.489362
TP63	0	23	2	22	0.489362
ZNF521	0	23	2	22	0.489362
DNAH3	1	22	3	21	0.608511
NOTCH1	1	22	3	21	0.608511
ADAMTS12	2	21	1	23	0.608511
AHNAK	2	21	1	23	0.608511
CTNND2	2	21	1	23	0.608511
CYLD	2	21	1	23	0.608511
KRAS	2	21	1	23	0.608511
STAT1	2	21	1	23	0.608511
USH2A	2	21	1	23	0.608511
FGFR3	2	21	4	20	0.666172
FLG	2	21	4	20	0.666172
FAT1	4	19	3	21	0.700776
ABAT	0	23	1	23	1
ABCA12	0	23	0	24	1
ABCA4	0	23	0	24	1
ABCA6	0	23	0	24	1
ABCA9	0	23	0	24	1
ABCD2	1	22	2	22	1
ABHD13	0	23	1	23	1
ABL2	0	23	1	23	1
ACACB	0	23	1	23	1
ADAMTSL1	0	23	1	23	1
ADCY1	0	23	0	24	1
AIM1	0	23	0	24	1
AKAP1	0	23	0	24	1
AKT1	0	23	0	24	1
AKT3	0	23	0	24	1
AMD1	0	23	0	24	1
ANKHD1-EIF4EBP3	0	23	0	24	1
ANKRD17	0	23	0	24	1
ANO4	0	23	0	24	1
APC	0	23	0	24	1
APOB	0	23	1	23	1
ARFGEF2	0	23	0	24	1
ARHGAP30	0	23	1	23	1
ARID1A	0	23	1	23	1
ASH1L	1	22	2	22	1
ASXL1	1	22	1	23	1
ATM	0	23	0	24	1
ATXN1	0	23	0	24	1
B2M	0	23	1	23	1
BAGE2	0	23	1	23	1
BAZ1B	0	23	0	24	1
BBS9	0	23	0	24	1
BCL9	0	23	1	23	1
BRCA1	0	23	0	24	1
BRCA2	1	22	2	22	1
BRD4	0	23	0	24	1
BZRAP1	0	23	0	24	1
CABIN1	0	23	1	23	1
CARD11	0	23	0	24	1
CASP8	0	23	1	23	1
CBL	0	23	0	24	1
CCNA1	0	23	0	24	1
CCR2	0	23	0	24	1
CCR5	0	23	0	24	1
CD248	0	23	0	24	1
CD8A	0	23	1	23	1
CDH11	0	23	1	23	1
CDH9	0	23	0	24	1
CDKN2A	0	23	0	24	1
CELSR3	0	23	0	24	1
CHD5	0	23	1	23	1
CNGA3	0	23	0	24	1
CNTN6	1	22	1	23	1
COL11A1	1	22	2	22	1
COL22A1	0	23	0	24	1
COQ3	0	23	1	23	1
CREBBP	0	23	1	23	1
CTNNB1	0	23	0	24	1
CUBN	1	22	2	22	1
CUL3	0	23	0	24	1
CYP26A1	0	23	1	23	1
DCC	0	23	0	24	1
DDX3X	1	22	2	22	1
DGKG	0	23	0	24	1
DICER1	0	23	0	24	1
DOK6	0	23	0	24	1
DPYS	0	23	0	24	1
DSEL	1	22	1	23	1
DST	0	23	0	24	1
DUSP5	0	23	1	23	1
DYRK1B	0	23	0	24	1
E2F3	0	23	0	24	1
E2F7	0	23	1	23	1
EBF1	0	23	1	23	1
EFCAB6	0	23	1	23	1
EGFR	0	23	0	24	1
ENPP2	0	23	0	24	1
EP400	0	23	1	23	1
EPHA1	0	23	0	24	1
EPHA2	1	22	1	23	1
EPHA3	0	23	0	24	1
EPHB3	0	23	1	23	1
EPM2AIP1	0	23	0	24	1
EPS8	0	23	0	24	1
ERBB3	0	23	1	23	1
ETV5	0	23	0	24	1
ETV6	0	23	1	23	1
EWSR1	0	23	1	23	1
EZH2	1	22	1	23	1
FAM135B	0	23	0	24	1
FAM179B	0	23	1	23	1
FAM5B	0	23	0	24	1
FANCA	0	23	0	24	1
FANCD2	1	22	1	23	1
FANCG	0	23	1	23	1
FANCM	0	23	0	24	1
FBXW7	1	22	1	23	1
FGFR1	0	23	0	24	1
FGFR2	1	22	1	23	1
FOXP1	0	23	0	24	1
FSTL5	0	23	1	23	1
GABRB3	0	23	0	24	1
GAS7	1	22	1	23	1
GC	0	23	0	24	1
GMPS	0	23	0	24	1
GNAQ	0	23	0	24	1
GPC5	1	22	1	23	1
GPR174	0	23	1	23	1
GRM8	1	22	1	23	1
HBS1L	0	23	0	24	1
HDX	0	23	0	24	1
HERC2	0	23	0	24	1
HLA-A	0	23	1	23	1
HLA-B	0	23	0	24	1
HRAS	1	22	1	23	1
HUWE1	2	21	3	21	1
HYDIN	0	23	1	23	1
IL6ST	0	23	0	24	1
INO80	0	23	1	23	1
INPP4A	1	22	1	23	1
INPP5D	0	23	1	23	1
INTS3	0	23	0	24	1
IRF6	0	23	1	23	1
ITK	0	23	0	24	1
JAK1	0	23	0	24	1
JAK2	0	23	1	23	1
KCTD8	0	23	1	23	1
KDR	0	23	0	24	1
KEAP1	0	23	0	24	1
KIAA1468	0	23	1	23	1
KIAA2022	0	23	1	23	1
KIT	0	23	0	24	1
KRT10	0	23	0	24	1
KRTAP4-3	0	23	1	23	1
KRTAP6-3	0	23	0	24	1
LAMB1	0	23	1	23	1
LILRA5	0	23	1	23	1
LILRB1	0	23	0	24	1
LILRB2	0	23	0	24	1
LOC200030	0	23	1	23	1
LOC642587	0	23	1	23	1
LRRC37B	0	23	1	23	1
LRRK2	0	23	0	24	1
LRRTM1	0	23	0	24	1
LRRTM3	0	23	0	24	1
LTBP1	0	23	0	24	1
MACF1	0	23	1	23	1
MAML3	1	22	1	23	1
MAP2	0	23	0	24	1
MAP3K1	0	23	0	24	1
MCOLN2	0	23	1	23	1
MECOM	0	23	0	24	1
MEF2C	0	23	0	24	1
MKL1	0	23	1	23	1
MLF1	0	23	0	24	1
MLL2	2	21	3	21	1
MLLT10	0	23	1	23	1
MST1R	0	23	0	24	1
MTA2	0	23	0	24	1
MUC2	1	22	2	22	1
MUC21	0	23	0	24	1
MX2	0	23	1	23	1
MYC	0	23	1	23	1
MYH1	0	23	1	23	1
MYH11	0	23	0	24	1
MYH13	0	23	1	23	1
MYH2	0	23	1	23	1
MYH4	0	23	1	23	1
MYH8	1	22	1	23	1
MYH9	0	23	1	23	1
NACA2	0	23	0	24	1
NAV3	0	23	0	24	1
NBPF1	0	23	0	24	1
NBPF3	0	23	1	23	1
NCOA3	0	23	0	24	1
NCOR1	0	23	1	23	1
NECAB1	0	23	0	24	1
NELL2	0	23	0	24	1
NF1	1	22	1	23	1
NF2	0	23	0	24	1
NFATC3	0	23	0	24	1
NFE2L2	1	22	1	23	1
NKAP	0	23	1	23	1
NLRP12	0	23	0	24	1
NLRP4	0	23	0	24	1
NOTCH2	0	23	0	24	1
NOTCH3	0	23	0	24	1
NRAP	0	23	0	24	1
NRAS	0	23	0	24	1
NRG2	1	22	1	23	1
NRK	1	22	1	23	1
NRXN3	0	23	1	23	1
NSD1	0	23	1	23	1
NTRK3	0	23	0	24	1
NUMA1	0	23	0	24	1
ODZ1	0	23	1	23	1
OR4C15	0	23	0	24	1
OR51S1	0	23	0	24	1
OR5L2	0	23	0	24	1
OR8H1	0	23	0	24	1
OR8H2	0	23	0	24	1
OR8K1	0	23	0	24	1
PARK2	0	23	1	23	1
PBRM1	0	23	1	23	1
PCDH15	1	22	1	23	1
PCDH17	0	23	1	23	1
PCDHA2	0	23	0	24	1
PCDHA6	0	23	0	24	1
PCDHAC2	0	23	0	24	1
PCDHB11	0	23	1	23	1
PCDHB12	0	23	0	24	1
PCDHB4	0	23	0	24	1
PCM1	0	23	0	24	1
PDE3A	0	23	1	23	1
PDE4DIP	1	22	1	23	1
PDGFRA	0	23	0	24	1
PEG3	1	22	2	22	1
PHKA2	0	23	0	24	1
PHKB	0	23	0	24	1
PHLPP1	1	22	1	23	1
PHLPP2	0	23	0	24	1
PIK3C2A	0	23	1	23	1
PIK3C2B	0	23	0	24	1
PIK3C2G	0	23	0	24	1
PIK3CG	0	23	0	24	1
PIK3R1	0	23	0	24	1
PKP4	0	23	1	23	1
PLAG1	0	23	0	24	1
PLIN5	0	23	0	24	1
PLXNA1	0	23	0	24	1
PMS1	0	23	1	23	1
PRDM11	0	23	0	24	1
PRDM7	0	23	0	24	1
PRDM9	0	23	0	24	1
PROKR2	0	23	0	24	1
PTEN	0	23	0	24	1
PTK6	0	23	0	24	1
PTPRF	0	23	1	23	1
PZP	0	23	0	24	1
RANBP17	0	23	0	24	1
RARG	0	23	0	24	1
RASA1	0	23	1	23	1
RBM15	0	23	0	24	1
RECQL4	0	23	1	23	1
RELN	0	23	0	24	1
RIMBP2	0	23	0	24	1
RIMS2	0	23	1	23	1
ROS1	0	23	0	24	1
RUNX1	0	23	1	23	1
RXFP3	0	23	1	23	1
SALL1	0	23	0	24	1
SBDS	0	23	1	23	1
SETBP1	0	23	0	24	1
SETD2	0	23	0	24	1
SFMBT2	0	23	0	24	1
SFRS14	0	23	0	24	1
SI	1	22	2	22	1
SLC2A13	0	23	0	24	1
SLCO5A1	0	23	0	24	1
SMAD1	0	23	1	23	1
SMAD4	0	23	0	24	1
SMARCA4	0	23	0	24	1
SMC6	0	23	0	24	1
SMO	0	23	0	24	1
SPAG17	1	22	1	23	1
SPTBN4	0	23	1	23	1
SPTLC2	0	23	0	24	1
SRGAP3	0	23	1	23	1
STAT3	0	23	0	24	1
STYK1	0	23	0	24	1
SYNE2	2	21	2	22	1
TDRD3	0	23	0	24	1
TEX15	1	22	1	23	1
TMEM132D	0	23	1	23	1
TNFAIP3	0	23	1	23	1
TP53	1	22	1	23	1
TPM3	0	23	0	24	1
TPP2	1	22	1	23	1
TPRX1	1	22	2	22	1
TRIO	0	23	0	24	1
TRRAP	1	22	2	22	1
TSC1	0	23	1	23	1
UBE3A	0	23	0	24	1
UBE4A	0	23	0	24	1
UBR5	1	22	1	23	1
USP26	0	23	1	23	1
USP6	0	23	1	23	1
VPS41	0	23	1	23	1
VWA5A	0	23	0	24	1
WBSCR17	0	23	0	24	1
WDR63	0	23	0	24	1
WHSC1	0	23	0	24	1
WHSC1L1	0	23	0	24	1
WRN	0	23	0	24	1
WT1	0	23	1	23	1
XPC	0	23	0	24	1
XRCC6	0	23	1	23	1
YTHDC1	0	23	0	24	1
ZEB2	0	23	0	24	1
ZFHX4	2	21	3	21	1
ZNF180	0	23	0	24	1
ZNF19	0	23	0	24	1
ZNF217	0	23	1	23	1
ZNF426	0	23	1	23	1
ZNF433	0	23	0	24	1
ZNF439	0	23	0	24	1
ZNF440	0	23	0	24	1
ZNF443	0	23	0	24	1
ZNF461	0	23	1	23	1
ZNF501	0	23	1	23	1
ZNF534	0	23	0	24	1
ZNF571	0	23	0	24	1
ZNF665	0	23	1	23	1
ZNF699	0	23	0	24	1
ZNF761	0	23	0	24	1
ZNF790	0	23	0	24	1
ZNF799	0	23	1	23	1
ZNF804B	1	22	1	23	1
ZNF823	0	23	0	24	1
ZNF83	0	23	1	23	1
Supplementary Table S2(C).5 Mutation event difference between drinkers and non-drinkers in HPV- tumor samples
Gene Name	Mutation Event in Non-drinker+light-drinker	No Mutation Event in Non-drinker+light-drinker	Mutation Event in Heavy-drinker	No Mutation Event in Heavy-drinker	P Value
AHNAK	4	19	1	45	0.0392382
CNTNAP2	3	20	1	45	0.104478
ERBB4	2	21	0	46	0.107843
PCDHB11	2	21	0	46	0.107843
PLCB1	2	21	0	46	0.107843
FAT2	0	23	5	41	0.161208
RB1CC1	0	23	5	41	0.161208
CDKN2A	2	21	11	35	0.193853
SPTA1	4	19	3	43	0.211011
TP53	16	7	38	8	0.231892
ABCA12	2	21	1	45	0.255926
ODZ1	2	21	1	45	0.255926
TMEM132D	2	21	1	45	0.255926
TPRX1	2	21	1	45	0.255926
APOB	0	23	4	42	0.29324
CUL3	0	23	4	42	0.29324
MYH8	0	23	4	42	0.29324
MLL2	2	21	9	37	0.313932
DNAH5	3	20	2	44	0.324306
PIK3CG	3	20	2	44	0.324306
ZNF804B	3	20	2	44	0.324306
ABL2	1	22	0	46	0.333333
AKT3	1	22	0	46	0.333333
AMD1	1	22	0	46	0.333333
ANKHD1-EIF4EBP3	1	22	0	46	0.333333
ASXL1	1	22	0	46	0.333333
BLM	1	22	0	46	0.333333
BZRAP1	1	22	0	46	0.333333
CBL	1	22	0	46	0.333333
CCNA1	1	22	0	46	0.333333
COL22A1	1	22	0	46	0.333333
CTNNB1	1	22	0	46	0.333333
DGKG	1	22	0	46	0.333333
DNAH3	1	22	0	46	0.333333
DPYS	1	22	0	46	0.333333
EPS8	1	22	0	46	0.333333
GABRB3	1	22	0	46	0.333333
GAS7	1	22	0	46	0.333333
GC	1	22	0	46	0.333333
HERC2	1	22	0	46	0.333333
INTS3	1	22	0	46	0.333333
JAK2	1	22	0	46	0.333333
KIAA2022	1	22	0	46	0.333333
LRRK2	1	22	0	46	0.333333
MED1	1	22	0	46	0.333333
MTA2	1	22	0	46	0.333333
MUC2	1	22	0	46	0.333333
MUC21	1	22	0	46	0.333333
NCOA3	1	22	0	46	0.333333
NF2	1	22	0	46	0.333333
NFATC3	1	22	0	46	0.333333
NKAPL	1	22	0	46	0.333333
NRG2	1	22	0	46	0.333333
NRXN3	1	22	0	46	0.333333
OR5L2	1	22	0	46	0.333333
OR8H1	1	22	0	46	0.333333
OR8H2	1	22	0	46	0.333333
PCDHA2	1	22	0	46	0.333333
PCDHA8	1	22	0	46	0.333333
PCDHB12	1	22	0	46	0.333333
PHKB	1	22	0	46	0.333333
PIK3C2B	1	22	0	46	0.333333
PIK3CB	1	22	0	46	0.333333
PRDM11	1	22	0	46	0.333333
PROKR2	1	22	0	46	0.333333
PTEN	1	22	0	46	0.333333
RB1	1	22	0	46	0.333333
RBM15	1	22	0	46	0.333333
SALL1	1	22	0	46	0.333333
SFMBT2	1	22	0	46	0.333333
SLC26A3	1	22	0	46	0.333333
SLITRK3	1	22	0	46	0.333333
SRPK2	1	22	0	46	0.333333
STAT3	1	22	0	46	0.333333
TDRD3	1	22	0	46	0.333333
TGFBR2	1	22	0	46	0.333333
TPM3	1	22	0	46	0.333333
TPP2	1	22	0	46	0.333333
VPS41	1	22	0	46	0.333333
WHSC1L1	1	22	0	46	0.333333
XPC	1	22	0	46	0.333333
ZNF19	1	22	0	46	0.333333
ZNF433	1	22	0	46	0.333333
ZNF440	1	22	0	46	0.333333
ZNF699	1	22	0	46	0.333333
CSMD3	5	18	15	31	0.409834
CDH9	1	22	6	40	0.410693
LRP1B	2	21	8	38	0.477299
PKHD1L1	2	21	8	38	0.477299
ZFHX4	2	21	8	38	0.477299
ADAMTS12	0	23	3	43	0.545654
COL11A1	0	23	3	43	0.545654
DICER1	0	23	3	43	0.545654
EPHA3	0	23	3	43	0.545654
FAM179B	0	23	3	43	0.545654
HDX	0	23	3	43	0.545654
ROS1	0	23	3	43	0.545654
ASH1L	0	23	2	44	0.54902
CARD11	0	23	2	44	0.54902
CELSR3	0	23	2	44	0.54902
CNTN6	0	23	2	44	0.54902
DOK6	0	23	2	44	0.54902
EGFR	0	23	2	44	0.54902
EP300	0	23	2	44	0.54902
GRM8	0	23	2	44	0.54902
INPP4A	0	23	2	44	0.54902
LRFN5	0	23	2	44	0.54902
LRRTM1	0	23	2	44	0.54902
NF1	0	23	2	44	0.54902
NLRP4	0	23	2	44	0.54902
NUMA1	0	23	2	44	0.54902
PAK7	0	23	2	44	0.54902
PTPRF	0	23	2	44	0.54902
PZP	0	23	2	44	0.54902
RIPK4	0	23	2	44	0.54902
SETBP1	0	23	2	44	0.54902
SLCO5A1	0	23	2	44	0.54902
TSC1	0	23	2	44	0.54902
VWA5A	0	23	2	44	0.54902
WBSCR17	0	23	2	44	0.54902
DDR2	2	21	2	44	0.596137
PCLO	2	21	2	44	0.596137
PDE3A	2	21	2	44	0.596137
PCDH15	1	22	5	41	0.6556
HUWE1	1	22	4	42	0.65827
PIK3C2G	1	22	4	42	0.65827
FLG	2	21	6	40	0.709667
SYNE1	4	19	11	35	0.758034
TTN	9	14	16	30	0.793284
ABAT	0	23	1	45	1
ABCD2	0	23	1	45	1
ADCY1	0	23	1	45	1
AIM1	0	23	1	45	1
AKAP1	0	23	1	45	1
AKT1	0	23	1	45	1
ANKRD17	0	23	1	45	1
ANO4	0	23	1	45	1
APC	0	23	1	45	1
ARHGAP30	0	23	1	45	1
ARID1A	0	23	1	45	1
ATM	0	23	1	45	1
ATXN1	0	23	1	45	1
BAGE2	0	23	1	45	1
BAZ1B	0	23	1	45	1
BBX	0	23	1	45	1
BRCA2	0	23	1	45	1
BRD4	0	23	1	45	1
BRIP1	0	23	1	45	1
BTBD12	0	23	1	45	1
CCR2	0	23	1	45	1
CCR5	0	23	1	45	1
CD248	0	23	1	45	1
CDH11	0	23	1	45	1
CDH12	1	22	2	44	1
CNGA3	0	23	1	45	1
COL6A3	0	23	1	45	1
COQ3	0	23	1	45	1
CUBN	1	22	2	44	1
CYLD	0	23	1	45	1
DCC	0	23	1	45	1
DSEL	0	23	1	45	1
DST	0	23	1	45	1
DYRK1B	0	23	1	45	1
E2F3	0	23	1	45	1
EBF1	0	23	1	45	1
EFCAB6	0	23	1	45	1
ENPP2	0	23	1	45	1
EPHA1	0	23	1	45	1
EPHA7	0	23	1	45	1
EPM2AIP1	0	23	1	45	1
ETV5	0	23	1	45	1
FANCA	0	23	1	45	1
FANCM	0	23	1	45	1
FGFR1	0	23	1	45	1
FLT3	0	23	1	45	1
FOXP1	0	23	1	45	1
FSTL5	0	23	1	45	1
GMPS	0	23	1	45	1
GNAQ	0	23	1	45	1
GPC5	0	23	1	45	1
GPR174	0	23	1	45	1
IL6ST	0	23	1	45	1
INPP4B	1	22	2	44	1
IRF6	0	23	1	45	1
KCTD8	0	23	1	45	1
KIAA1468	0	23	1	45	1
KIT	0	23	1	45	1
KRAS	0	23	1	45	1
KRTAP6-3	0	23	1	45	1
LILRB1	0	23	1	45	1
LILRB2	0	23	1	45	1
LRRTM3	0	23	1	45	1
LTBP1	0	23	1	45	1
MAP3K1	0	23	1	45	1
MECOM	0	23	1	45	1
MST1R	0	23	1	45	1
MTOR	1	22	2	44	1
MYH11	0	23	1	45	1
MYH13	1	22	2	44	1
MYH2	0	23	1	45	1
MYH9	0	23	1	45	1
NACA2	0	23	1	45	1
NECAB1	0	23	1	45	1
NFE2L2	0	23	1	45	1
NLRP12	0	23	1	45	1
NOTCH1	4	19	7	39	1
NOTCH2	2	21	3	43	1
NRAP	0	23	1	45	1
NRAS	0	23	1	45	1
NTRK3	0	23	1	45	1
OR4C15	0	23	1	45	1
OR51S1	0	23	1	45	1
PBRM1	0	23	1	45	1
PCDHA6	0	23	1	45	1
PCDHAC2	0	23	1	45	1
PCDHB4	0	23	1	45	1
PCM1	0	23	1	45	1
PDGFRA	0	23	1	45	1
PHKA2	0	23	1	45	1
PHLPP1	0	23	1	45	1
PKD1L1	0	23	1	45	1
PKP4	0	23	1	45	1
PLIN5	0	23	1	45	1
PLXNA1	0	23	1	45	1
PPP4R4	0	23	1	45	1
RANBP17	0	23	1	45	1
RARG	0	23	1	45	1
RIMBP2	0	23	1	45	1
RIMS2	0	23	1	45	1
RXFP3	0	23	1	45	1
SETD2	0	23	1	45	1
SLC2A13	0	23	1	45	1
SMAD4	0	23	1	45	1
SMARCA4	0	23	1	45	1
SMC6	0	23	1	45	1
SPAG17	0	23	1	45	1
STYK1	0	23	1	45	1
TAP2	0	23	1	45	1
TP63	0	23	1	45	1
UNC5D	1	22	2	44	1
USP26	0	23	1	45	1
WHSC1	0	23	1	45	1
XRCC6	0	23	1	45	1
ZEB2	0	23	1	45	1
ZNF180	0	23	1	45	1
ZNF439	0	23	1	45	1
ZNF443	0	23	1	45	1
ZNF534	0	23	1	45	1
ZNF571	0	23	1	45	1
ZNF761	0	23	1	45	1
ZNF790	0	23	1	45	1
ZNF799	0	23	1	45	1
ZNF823	0	23	1	45	1
ABCA4	1	22	1	45	1
ABCA6	1	22	1	45	1
ABCA9	1	22	1	45	1
ABHD13	0	23	0	46	1
ACACB	0	23	0	46	1
ADAMTSL1	0	23	0	46	1
ARFGEF2	0	23	0	46	1
B2M	0	23	0	46	1
BBS9	0	23	0	46	1
BCL9	0	23	0	46	1
BIRC3	0	23	0	46	1
BRCA1	0	23	0	46	1
C1orf173	1	22	3	43	1
CABIN1	0	23	0	46	1
CASP8	1	22	1	45	1
CD8A	0	23	0	46	1
CDH1	0	23	0	46	1
[truncated: 592 more rows]

## Sheet: S2(D) Large Pri vs Small Pri
Supplementary Table S2(D).1 Mutation event difference between large primary and small primary in all tumor samples
Gene Name	Mutation Event in Small Primary	No Mutation Event in Small Primary	Mutation Event in Large Primary	No Mutation Event in Large Primary	P Value
EZH2	3	36	0	81	0.0325417
NRG2	3	36	0	81	0.0325417
STAT1	3	36	0	81	0.0325417
TP53	13	26	43	38	0.0516345
APOB	4	35	2	79	0.0866176
CYLD	3	36	1	80	0.100128
EPHA7	3	36	1	80	0.100128
PKD1L1	3	36	1	80	0.100128
BRIP1	2	37	0	81	0.103782
E2F7	2	37	0	81	0.103782
FANCD2	2	37	0	81	0.103782
FLG2	2	37	0	81	0.103782
MYH4	2	37	0	81	0.103782
PCDHA8	2	37	0	81	0.103782
TEX15	2	37	0	81	0.103782
ZNF799	2	37	0	81	0.103782
TTN	17	22	23	58	0.104295
CNTNAP2	0	39	5	76	0.172421
PIK3C2G	0	39	5	76	0.172421
MYH8	0	39	6	75	0.175466
FGFR3	4	35	3	78	0.212481
RB1CC1	4	35	3	78	0.212481
DSPP	2	37	1	80	0.246261
GAS7	2	37	1	80	0.246261
NFE2L2	2	37	1	80	0.246261
NKAPL	2	37	1	80	0.246261
PTPRF	2	37	1	80	0.246261
RGAG1	2	37	1	80	0.246261
SLC26A3	2	37	1	80	0.246261
TGFBR2	2	37	1	80	0.246261
ADAMTS12	1	38	7	74	0.272269
CDH9	1	38	7	74	0.272269
PCDH15	1	38	7	74	0.272269
ABCD2	0	39	4	77	0.302663
BBX	0	39	4	77	0.302663
FAM135B	0	39	4	77	0.302663
KEAP1	0	39	4	77	0.302663
KRAS	0	39	4	77	0.302663
MYH13	0	39	4	77	0.302663
ODZ1	0	39	4	77	0.302663
TMEM132D	0	39	4	77	0.302663
UNC5D	0	39	4	77	0.302663
ANO4	1	38	0	81	0.325
ARFGEF2	1	38	0	81	0.325
BBS9	1	38	0	81	0.325
BCL9	1	38	0	81	0.325
BIRC3	1	38	0	81	0.325
CABIN1	1	38	0	81	0.325
CBL	1	38	0	81	0.325
CD248	1	38	0	81	0.325
CD8A	1	38	0	81	0.325
CDH1	1	38	0	81	0.325
CHD5	1	38	0	81	0.325
CLSTN2	1	38	0	81	0.325
EPHB3	1	38	0	81	0.325
EPM2AIP1	1	38	0	81	0.325
ERAS	1	38	0	81	0.325
ERBB3	1	38	0	81	0.325
ETV6	1	38	0	81	0.325
FAM5B	1	38	0	81	0.325
FARP2	1	38	0	81	0.325
FGFR4	1	38	0	81	0.325
HLA-B	1	38	0	81	0.325
IL6ST	1	38	0	81	0.325
ITK	1	38	0	81	0.325
JAK1	1	38	0	81	0.325
KRTAP4-3	1	38	0	81	0.325
LILRB1	1	38	0	81	0.325
LTBP1	1	38	0	81	0.325
MDM2	1	38	0	81	0.325
MTA2	1	38	0	81	0.325
MYH6	1	38	0	81	0.325
MYH7	1	38	0	81	0.325
NBPF3	1	38	0	81	0.325
NECAB1	1	38	0	81	0.325
NELL2	1	38	0	81	0.325
NKAP	1	38	0	81	0.325
NONO	1	38	0	81	0.325
NTRK3	1	38	0	81	0.325
OR51S1	1	38	0	81	0.325
OR8H1	1	38	0	81	0.325
OR8K1	1	38	0	81	0.325
PARK2	1	38	0	81	0.325
PCDHA13	1	38	0	81	0.325
PCDHA2	1	38	0	81	0.325
PCDHB4	1	38	0	81	0.325
PHIP	1	38	0	81	0.325
PHKA2	1	38	0	81	0.325
PHLPP2	1	38	0	81	0.325
PIK3C2A	1	38	0	81	0.325
PIK3R2	1	38	0	81	0.325
PLAG1	1	38	0	81	0.325
PRDM7	1	38	0	81	0.325
PROKR2	1	38	0	81	0.325
PRR21	1	38	0	81	0.325
RBM15	1	38	0	81	0.325
SMAD1	1	38	0	81	0.325
SMC6	1	38	0	81	0.325
SMO	1	38	0	81	0.325
SPTLC2	1	38	0	81	0.325
TDRD3	1	38	0	81	0.325
UBE3A	1	38	0	81	0.325
UBE4A	1	38	0	81	0.325
USP6	1	38	0	81	0.325
ZNF699	1	38	0	81	0.325
C1orf173	3	36	2	79	0.327792
NF1	3	36	2	79	0.327792
PEG3	3	36	2	79	0.327792
POLQ	3	36	2	79	0.327792
LRP1B	2	37	10	71	0.333025
PKHD1L1	2	37	10	71	0.333025
NOTCH1	3	36	12	69	0.380639
CUBN	3	36	3	78	0.388933
MTOR	1	38	6	75	0.425249
NSD1	1	38	6	75	0.425249
AHNAK	4	35	4	77	0.435128
SYNE1	5	34	16	65	0.446103
HUWE1	2	37	8	73	0.496227
SI	2	37	8	73	0.496227
CDKN2A	3	36	10	71	0.543572
USH2A	3	36	10	71	0.543572
FLG	3	36	11	70	0.544814
ABCA9	1	38	1	80	0.546218
APC	1	38	1	80	0.546218
BAGE2	1	38	1	80	0.546218
BLM	1	38	1	80	0.546218
CARD11	1	38	1	80	0.546218
CDH10	1	38	1	80	0.546218
CREBBP	1	38	1	80	0.546218
DOK6	1	38	1	80	0.546218
DST	1	38	1	80	0.546218
EBF1	1	38	1	80	0.546218
FANCA	1	38	1	80	0.546218
FGFR2	1	38	1	80	0.546218
FLT3	1	38	1	80	0.546218
FSTL5	1	38	1	80	0.546218
IRF6	1	38	1	80	0.546218
KCTD8	1	38	1	80	0.546218
KIAA2022	1	38	1	80	0.546218
MED1	1	38	1	80	0.546218
MYH11	1	38	1	80	0.546218
MYH2	1	38	1	80	0.546218
NLRP11	1	38	1	80	0.546218
NRAP	1	38	1	80	0.546218
NRK	1	38	1	80	0.546218
NUMA1	1	38	1	80	0.546218
NUP214	1	38	1	80	0.546218
PKP4	1	38	1	80	0.546218
PPP4R4	1	38	1	80	0.546218
RIMS2	1	38	1	80	0.546218
SLC2A13	1	38	1	80	0.546218
SLCO5A1	1	38	1	80	0.546218
TAP2	1	38	1	80	0.546218
TRAF3	1	38	1	80	0.546218
TRIO	1	38	1	80	0.546218
VPS41	1	38	1	80	0.546218
WBSCR17	1	38	1	80	0.546218
WDR63	1	38	1	80	0.546218
XRCC6	1	38	1	80	0.546218
YTHDC1	1	38	1	80	0.546218
ZEB2	1	38	1	80	0.546218
ZNF790	1	38	1	80	0.546218
ABCA12	0	39	3	78	0.550064
CASP8	0	39	3	78	0.550064
DICER1	0	39	3	78	0.550064
EPHA3	0	39	3	78	0.550064
ERBB4	0	39	3	78	0.550064
HDX	0	39	3	78	0.550064
HYDIN	0	39	3	78	0.550064
MYH1	0	39	3	78	0.550064
PCDHB11	0	39	3	78	0.550064
PLEC	0	39	3	78	0.550064
RASA1	0	39	3	78	0.550064
SPAG17	0	39	3	78	0.550064
TET2	0	39	3	78	0.550064
TFRC	0	39	3	78	0.550064
TP63	0	39	3	78	0.550064
FAT1	6	33	9	72	0.560572
CUL3	2	37	2	79	0.594929
DDX3X	2	37	2	79	0.594929
DSEL	2	37	2	79	0.594929
FAT4	2	37	2	79	0.594929
GRM8	2	37	2	79	0.594929
HRAS	2	37	2	79	0.594929
LRFN5	2	37	2	79	0.594929
NOTCH3	2	37	2	79	0.594929
PAK7	2	37	2	79	0.594929
PLCB1	2	37	2	79	0.594929
PIK3CA	5	34	14	67	0.603617
DDR2	2	37	3	78	0.659531
PDE3A	2	37	3	78	0.659531
PIK3CG	2	37	3	78	0.659531
RELN	2	37	3	78	0.659531
EP300	1	38	5	76	0.662492
FBXW7	1	38	5	76	0.662492
CDH12	3	36	4	77	0.680848
COL11A1	3	36	4	77	0.680848
ZNF804B	3	36	4	77	0.680848
MLL3	3	36	5	76	0.713798
PCLO	3	36	5	76	0.713798
UBR5	3	36	5	76	0.713798
ABAT	0	39	2	79	1
ABCA4	0	39	2	79	1
ABCA6	0	39	2	79	1
ABHD13	0	39	1	80	1
ABL2	0	39	2	79	1
ACACB	0	39	1	80	1
ADAMTSL1	0	39	1	80	1
ADCY1	0	39	1	80	1
AIM1	0	39	1	80	1
AKAP1	0	39	1	80	1
AKT1	0	39	1	80	1
AKT3	0	39	1	80	1
AMD1	0	39	1	80	1
ANKHD1-EIF4EBP3	0	39	1	80	1
ANKRD17	0	39	1	80	1
ARHGAP30	0	39	2	79	1
ARID1A	0	39	2	79	1
ASH1L	2	37	4	77	1
ASXL1	1	38	2	79	1
ATM	0	39	1	80	1
ATXN1	0	39	1	80	1
B2M	0	39	1	80	1
BAZ1B	0	39	1	80	1
BRCA1	0	39	1	80	1
BRCA2	1	38	3	78	1
BRD4	0	39	1	80	1
BTBD12	0	39	2	79	1
BZRAP1	0	39	1	80	1
CCNA1	0	39	1	80	1
CCR2	0	39	1	80	1
CCR5	0	39	1	80	1
CDH11	0	39	2	79	1
CELSR3	1	38	2	79	1
CLCN4	0	39	1	80	1
CNGA3	0	39	1	80	1
CNTN6	1	38	4	77	1
COL22A1	0	39	1	80	1
COL6A3	1	38	3	78	1
COQ3	0	39	2	79	1
CRIPAK	0	39	2	79	1
CSMD3	8	31	17	64	1
CTNNB1	0	39	1	80	1
CTNND2	1	38	2	79	1
CYP26A1	0	39	1	80	1
DCC	0	39	1	80	1
DCT	0	39	1	80	1
DGKG	0	39	1	80	1
DNAH3	1	38	4	77	1
DNAH5	3	36	6	75	1
DPYS	0	39	1	80	1
DSCAM	1	38	3	78	1
DUSP5	0	39	1	80	1
DYRK1B	0	39	1	80	1
E2F3	0	39	1	80	1
EFCAB6	0	39	2	79	1
EGFR	0	39	2	79	1
ENPP2	0	39	1	80	1
EP400	0	39	1	80	1
EPHA1	0	39	1	80	1
EPHA2	1	38	3	78	1
EPHB1	0	39	1	80	1
EPS8	0	39	1	80	1
ETV5	0	39	1	80	1
EWSR1	0	39	1	80	1
FAM179B	1	38	3	78	1
FANCG	0	39	1	80	1
FANCM	0	39	1	80	1
FAT2	2	37	5	76	1
FGFR1	0	39	1	80	1
FOXP1	0	39	1	80	1
GABRB3	0	39	1	80	1
GC	0	39	1	80	1
GMPS	0	39	1	80	1
GNAQ	0	39	1	80	1
GPC5	1	38	2	79	1
GPR174	0	39	2	79	1
HBS1L	0	39	0	81	1
HERC2	0	39	1	80	1
HLA-A	0	39	1	80	1
HSCB	0	39	1	80	1
INCENP	0	39	1	80	1
INO80	0	39	1	80	1
INPP4A	1	38	3	78	1
INPP4B	1	38	3	78	1
INPP5D	0	39	1	80	1
INTS3	0	39	1	80	1
JAK2	0	39	2	79	1
KDM5A	0	39	1	80	1
KDR	1	38	2	79	1
KIAA1468	0	39	2	79	1
KIAA1549	1	38	3	78	1
KIT	0	39	1	80	1
KRT10	0	39	1	80	1
KRTAP6-3	0	39	1	80	1
LAMB1	0	39	1	80	1
LILRA3	0	39	1	80	1
LILRA5	0	39	1	80	1
LILRB2	0	39	1	80	1
LOC200030	0	39	1	80	1
LOC642587	0	39	1	80	1
LRRC37B	0	39	1	80	1
LRRK2	0	39	1	80	1
LRRTM1	0	39	2	79	1
LRRTM3	0	39	1	80	1
MACF1	1	38	4	77	1
MAML3	1	38	3	78	1
MAP2	1	38	4	77	1
MAP3K1	0	39	1	80	1
MCOLN2	0	39	1	80	1
MECOM	0	39	1	80	1
MEF2C	0	39	2	79	1
MKL1	0	39	1	80	1
MLF1	0	39	1	80	1
MLL2	5	34	11	70	1
MLLT10	0	39	1	80	1
MMP16	0	39	1	80	1
MST1R	0	39	1	80	1
MUC2	1	38	3	78	1
MUC21	0	39	1	80	1
MX2	0	39	1	80	1
MYC	0	39	1	80	1
MYH7B	0	39	1	80	1
MYH9	0	39	2	79	1
NACA2	0	39	1	80	1
NAV3	1	38	4	77	1
NBPF1	0	39	2	79	1
NCOA3	0	39	1	80	1
NCOR1	1	38	2	79	1
NF2	0	39	1	80	1
NFATC3	0	39	1	80	1
NLRP12	0	39	1	80	1
NLRP4	0	39	2	79	1
NOTCH2	1	38	4	77	1
NRAS	0	39	1	80	1
NRXN3	0	39	2	79	1
OR4C15	0	39	1	80	1
OR5L2	0	39	1	80	1
OR8H2	0	39	1	80	1
PALB2	0	39	1	80	1
PBRM1	1	38	2	79	1
PCDH17	0	39	1	80	1
PCDHA1	0	39	1	80	1
PCDHA12	0	39	1	80	1
PCDHA6	0	39	1	80	1
PCDHAC2	0	39	1	80	1
PCDHB12	0	39	1	80	1
PCM1	0	39	1	80	1
PDE4DIP	2	37	4	77	1
PDGFRA	0	39	1	80	1
PHKB	0	39	1	80	1
PHLPP1	1	38	2	79	1
PIK3C2B	0	39	1	80	1
PIK3C3	1	38	2	79	1
PIK3CB	0	39	2	79	1
PIK3R1	0	39	1	80	1
PKHD1	1	38	3	78	1
PLIN5	0	39	1	80	1
PLXNA1	0	39	1	80	1
PMS1	1	38	2	79	1
PMS2	0	39	1	80	1
PPP1R9A	0	39	1	80	1
PRDM11	0	39	1	80	1
PRDM9	0	39	2	79	1
PRKCA	0	39	2	79	1
PTEN	0	39	1	80	1
PTK6	0	39	0	81	1
PZP	0	39	2	79	1
RAD51L1	0	39	1	80	1
RANBP17	0	39	1	80	1
RARG	0	39	1	80	1
RB1	1	38	3	78	1
RECQL4	0	39	1	80	1
REST	1	38	2	79	1
RIMBP2	0	39	1	80	1
RIPK4	1	38	3	78	1
ROS1	1	38	3	78	1
RUFY1	0	39	1	80	1
RUNX1	0	39	1	80	1
RXFP3	0	39	2	79	1
SALL1	0	39	1	80	1
SBDS	0	39	1	80	1
SETBP1	0	39	2	79	1
SETD2	0	39	1	80	1
SFMBT2	0	39	1	80	1
SFRS14	0	39	2	79	1
SLITRK3	0	39	2	79	1
SMAD4	0	39	1	80	1
SMARCA4	0	39	1	80	1
SPTA1	2	37	6	75	1
SPTBN4	0	39	1	80	1
SRGAP3	0	39	1	80	1
SRPK2	0	39	2	79	1
STAT3	0	39	1	80	1
STYK1	0	39	1	80	1
SYNE2	3	36	7	74	1
THSD7A	2	37	4	77	1
TNFAIP3	0	39	1	80	1
TPM3	0	39	1	80	1
TPP2	1	38	2	79	1
TPRX1	2	37	4	77	1
TRIP11	0	39	1	80	1
TRRAP	1	38	2	79	1
TSC1	1	38	2	79	1
TSC2	0	39	1	80	1
USP26	0	39	2	79	1
VWA5A	0	39	2	79	1
WHSC1	0	39	1	80	1
WHSC1L1	0	39	1	80	1
WRN	0	39	2	79	1
WT1	0	39	1	80	1
XPC	0	39	1	80	1
ZFHX4	5	34	11	70	1
ZNF180	0	39	1	80	1
ZNF19	0	39	1	80	1
ZNF217	0	39	1	80	1
ZNF426	0	39	1	80	1
ZNF433	0	39	1	80	1
ZNF439	0	39	1	80	1
ZNF440	0	39	1	80	1
ZNF443	0	39	1	80	1
ZNF461	0	39	1	80	1
ZNF501	0	39	1	80	1
ZNF521	2	37	4	77	1
ZNF534	0	39	1	80	1
ZNF571	0	39	1	80	1
ZNF665	0	39	1	80	1
ZNF761	0	39	1	80	1
ZNF823	0	39	1	80	1
ZNF83	0	39	1	80	1
Supplementary Table S2(D).2 Mutation event difference between large primary and small primary in all oropharynx tumor samples
Gene Name	Mutation Event in Small Primary	No Mutation Event in Small Primary	Mutation Event in Large Primary	No Mutation Event in Large Primary	P Value
CYLD	3	25	0	39	0.0683853
RB1CC1	3	25	0	39	0.0683853
STAT1	3	25	0	39	0.0683853
SI	0	28	5	34	0.0697931
ABCD2	0	28	4	35	0.134023
ADAMTS12	0	28	4	35	0.134023
CDH9	0	28	4	35	0.134023
KRAS	0	28	4	35	0.134023
MTOR	0	28	4	35	0.134023
MYH8	0	28	4	35	0.134023
APOB	2	26	0	39	0.170963
BRIP1	2	26	0	39	0.170963
EZH2	2	26	0	39	0.170963
FANCD2	2	26	0	39	0.170963
GRM8	2	26	0	39	0.170963
HRAS	2	26	0	39	0.170963
NKAPL	2	26	0	39	0.170963
NRG2	2	26	0	39	0.170963
PCDHA8	2	26	0	39	0.170963
PDE3A	2	26	0	39	0.170963
PTPRF	2	26	0	39	0.170963
RGAG1	2	26	0	39	0.170963
TEX15	2	26	0	39	0.170963
TGFBR2	2	26	0	39	0.170963
HUWE1	1	27	6	33	0.224731
FGFR3	4	24	2	37	0.226906
BBX	0	28	3	36	0.259159
CNTN6	0	28	3	36	0.259159
PKHD1L1	0	28	3	36	0.259159
SPAG17	0	28	3	36	0.259159
TFRC	0	28	3	36	0.259159
FLG	2	26	7	32	0.285261
TTN	12	16	11	28	0.297353
AHNAK	3	25	1	38	0.300712
CUBN	3	25	1	38	0.300712
PIK3CA	4	24	10	29	0.36424
EP300	1	27	4	35	0.390943
TP53	5	23	11	28	0.393436
ABCA9	1	27	0	39	0.41791
ANO4	1	27	0	39	0.41791
BAGE2	1	27	0	39	0.41791
BCL9	1	27	0	39	0.41791
BIRC3	1	27	0	39	0.41791
BLM	1	27	0	39	0.41791
C1orf173	1	27	0	39	0.41791
CABIN1	1	27	0	39	0.41791
CBL	1	27	0	39	0.41791
CD8A	1	27	0	39	0.41791
CDH1	1	27	0	39	0.41791
CHD5	1	27	0	39	0.41791
CLSTN2	1	27	0	39	0.41791
CUL3	1	27	0	39	0.41791
E2F7	1	27	0	39	0.41791
EBF1	1	27	0	39	0.41791
EPHB3	1	27	0	39	0.41791
EPM2AIP1	1	27	0	39	0.41791
ERAS	1	27	0	39	0.41791
ERBB3	1	27	0	39	0.41791
ETV6	1	27	0	39	0.41791
FARP2	1	27	0	39	0.41791
FGFR4	1	27	0	39	0.41791
FLG2	1	27	0	39	0.41791
FLT3	1	27	0	39	0.41791
FSTL5	1	27	0	39	0.41791
INPP4B	1	27	0	39	0.41791
IRF6	1	27	0	39	0.41791
KIAA2022	1	27	0	39	0.41791
KRTAP4-3	1	27	0	39	0.41791
LILRB1	1	27	0	39	0.41791
MDM2	1	27	0	39	0.41791
MED1	1	27	0	39	0.41791
MTA2	1	27	0	39	0.41791
MYH4	1	27	0	39	0.41791
MYH6	1	27	0	39	0.41791
MYH7	1	27	0	39	0.41791
NBPF3	1	27	0	39	0.41791
NCOR1	1	27	0	39	0.41791
NECAB1	1	27	0	39	0.41791
NKAP	1	27	0	39	0.41791
NONO	1	27	0	39	0.41791
NOTCH2	1	27	0	39	0.41791
NUMA1	1	27	0	39	0.41791
OR8H1	1	27	0	39	0.41791
PARK2	1	27	0	39	0.41791
PCDHA13	1	27	0	39	0.41791
PCDHB4	1	27	0	39	0.41791
PHIP	1	27	0	39	0.41791
PHKA2	1	27	0	39	0.41791
PIK3C2A	1	27	0	39	0.41791
PIK3CG	1	27	0	39	0.41791
PIK3R2	1	27	0	39	0.41791
PKP4	1	27	0	39	0.41791
PPP4R4	1	27	0	39	0.41791
PRR21	1	27	0	39	0.41791
RBM15	1	27	0	39	0.41791
RIMS2	1	27	0	39	0.41791
SMAD1	1	27	0	39	0.41791
TDRD3	1	27	0	39	0.41791
TRIO	1	27	0	39	0.41791
USP6	1	27	0	39	0.41791
VPS41	1	27	0	39	0.41791
WBSCR17	1	27	0	39	0.41791
XRCC6	1	27	0	39	0.41791
YTHDC1	1	27	0	39	0.41791
ZNF699	1	27	0	39	0.41791
ZNF799	1	27	0	39	0.41791
ABAT	0	28	2	37	0.506106
BTBD12	0	28	2	37	0.506106
COL6A3	0	28	2	37	0.506106
CRIPAK	0	28	2	37	0.506106
DICER1	0	28	2	37	0.506106
DSCAM	0	28	2	37	0.506106
EFCAB6	0	28	2	37	0.506106
HYDIN	0	28	2	37	0.506106
LRFN5	0	28	2	37	0.506106
PBRM1	0	28	2	37	0.506106
PIK3C3	0	28	2	37	0.506106
PKHD1	0	28	2	37	0.506106
PLEC	0	28	2	37	0.506106
PRKCA	0	28	2	37	0.506106
RIPK4	0	28	2	37	0.506106
RXFP3	0	28	2	37	0.506106
TP63	0	28	2	37	0.506106
TSC1	0	28	2	37	0.506106
DDX3X	2	26	1	38	0.566893
DNAH5	2	26	1	38	0.566893
EPHA7	2	26	1	38	0.566893
MLL3	2	26	1	38	0.566893
NF1	2	26	1	38	0.566893
NFE2L2	2	26	1	38	0.566893
PEG3	2	26	1	38	0.566893
PKD1L1	2	26	1	38	0.566893
PLCB1	2	26	1	38	0.566893
SPTA1	2	26	1	38	0.566893
THSD7A	2	26	1	38	0.566893
ZNF804B	2	26	1	38	0.566893
BRCA2	1	27	3	36	0.634566
CDKN2A	1	27	3	36	0.634566
DNAH3	1	27	3	36	0.634566
LRP1B	1	27	3	36	0.634566
PCDH15	1	27	3	36	0.634566
SYNE2	3	25	3	36	0.688455
FAT1	4	24	4	35	0.710813
CSMD3	4	24	8	31	0.747933
NOTCH1	3	25	5	34	1
SYNE1	3	25	5	34	1
UBR5	3	25	5	34	1
ABCA12	0	28	0	39	1
ABCA4	0	28	0	39	1
ABCA6	0	28	0	39	1
ABHD13	0	28	1	38	1
ABL2	0	28	1	38	1
ACACB	0	28	1	38	1
ADAMTSL1	0	28	1	38	1
ADCY1	0	28	0	39	1
AIM1	0	28	0	39	1
AKAP1	0	28	0	39	1
AKT1	0	28	0	39	1
AKT3	0	28	0	39	1
AMD1	0	28	0	39	1
ANKHD1-EIF4EBP3	0	28	0	39	1
ANKRD17	0	28	1	38	1
APC	0	28	0	39	1
ARFGEF2	0	28	0	39	1
ARHGAP30	0	28	1	38	1
ARID1A	0	28	1	38	1
ASH1L	2	26	3	36	1
ASXL1	1	27	1	38	1
ATM	0	28	0	39	1
ATXN1	0	28	1	38	1
B2M	0	28	1	38	1
BAZ1B	0	28	1	38	1
BBS9	0	28	0	39	1
BRCA1	0	28	0	39	1
BRD4	0	28	0	39	1
BZRAP1	0	28	0	39	1
CARD11	0	28	1	38	1
CASP8	0	28	1	38	1
CCNA1	0	28	0	39	1
CCR2	0	28	0	39	1
CCR5	0	28	1	38	1
CD248	0	28	0	39	1
CDH10	0	28	1	38	1
CDH11	0	28	1	38	1
CDH12	1	27	2	37	1
CELSR3	0	28	0	39	1
CLCN4	0	28	1	38	1
CNGA3	0	28	0	39	1
CNTNAP2	0	28	1	38	1
COL11A1	2	26	3	36	1
COL22A1	0	28	0	39	1
COQ3	0	28	1	38	1
CREBBP	0	28	1	38	1
CTNNB1	0	28	0	39	1
CTNND2	1	27	2	37	1
CYP26A1	0	28	1	38	1
DCC	0	28	0	39	1
DCT	0	28	1	38	1
DDR2	1	27	1	38	1
DGKG	0	28	0	39	1
DOK6	0	28	1	38	1
DPYS	0	28	0	39	1
DSEL	1	27	1	38	1
DSPP	1	27	1	38	1
DST	0	28	1	38	1
DUSP5	0	28	1	38	1
DYRK1B	0	28	0	39	1
E2F3	0	28	0	39	1
EGFR	0	28	1	38	1
ENPP2	0	28	0	39	1
EP400	0	28	1	38	1
EPHA1	0	28	1	38	1
EPHA2	1	27	1	38	1
EPHA3	0	28	0	39	1
EPHB1	0	28	1	38	1
EPS8	0	28	0	39	1
ERBB4	0	28	1	38	1
ETV5	0	28	0	39	1
EWSR1	0	28	1	38	1
FAM135B	0	28	1	38	1
FAM179B	0	28	1	38	1
FAM5B	0	28	0	39	1
FANCA	0	28	1	38	1
FANCG	0	28	1	38	1
FANCM	0	28	0	39	1
FAT2	1	27	2	37	1
FAT4	0	28	1	38	1
FBXW7	1	27	2	37	1
FGFR1	0	28	0	39	1
FGFR2	1	27	1	38	1
FOXP1	0	28	0	39	1
GABRB3	0	28	0	39	1
GAS7	1	27	1	38	1
GC	0	28	0	39	1
GMPS	0	28	1	38	1
GNAQ	0	28	0	39	1
GPC5	1	27	2	37	1
GPR174	0	28	1	38	1
HBS1L	0	28	0	39	1
HDX	0	28	0	39	1
HERC2	0	28	0	39	1
HLA-A	0	28	1	38	1
HLA-B	0	28	0	39	1
HSCB	0	28	1	38	1
IL6ST	0	28	0	39	1
INCENP	0	28	1	38	1
INO80	0	28	1	38	1
INPP4A	1	27	2	37	1
INPP5D	0	28	1	38	1
INTS3	0	28	0	39	1
ITK	0	28	0	39	1
JAK1	0	28	0	39	1
JAK2	0	28	1	38	1
KCTD8	0	28	1	38	1
KDM5A	0	28	1	38	1
KDR	0	28	0	39	1
KEAP1	0	28	0	39	1
KIAA1468	0	28	1	38	1
KIAA1549	0	28	1	38	1
KIT	0	28	0	39	1
KRT10	0	28	0	39	1
KRTAP6-3	0	28	1	38	1
LAMB1	0	28	1	38	1
LILRA3	0	28	1	38	1
LILRA5	0	28	1	38	1
LILRB2	0	28	1	38	1
LOC200030	0	28	1	38	1
LOC642587	0	28	1	38	1
LRRC37B	0	28	1	38	1
LRRK2	0	28	0	39	1
LRRTM1	0	28	1	38	1
LRRTM3	0	28	0	39	1
LTBP1	0	28	0	39	1
MACF1	1	27	1	38	1
MAML3	1	27	2	37	1
MAP2	0	28	1	38	1
MAP3K1	0	28	0	39	1
MCOLN2	0	28	1	38	1
MECOM	0	28	0	39	1
MEF2C	0	28	1	38	1
MKL1	0	28	1	38	1
MLF1	0	28	0	39	1
MLL2	4	24	6	33	1
MLLT10	0	28	1	38	1
MMP16	0	28	1	38	1
MST1R	0	28	0	39	1
MUC2	1	27	2	37	1
MUC21	0	28	0	39	1
MX2	0	28	1	38	1
MYC	0	28	1	38	1
MYH1	0	28	1	38	1
MYH11	0	28	0	39	1
MYH13	0	28	1	38	1
MYH2	1	27	1	38	1
MYH7B	0	28	1	38	1
MYH9	0	28	1	38	1
NACA2	0	28	0	39	1
NAV3	0	28	1	38	1
NBPF1	0	28	1	38	1
NCOA3	0	28	0	39	1
NELL2	0	28	0	39	1
NF2	0	28	0	39	1
NFATC3	0	28	0	39	1
NLRP11	1	27	1	38	1
NLRP12	0	28	0	39	1
NLRP4	0	28	0	39	1
NOTCH3	1	27	1	38	1
NRAP	0	28	0	39	1
NRAS	0	28	1	38	1
NRK	1	27	1	38	1
NRXN3	0	28	1	38	1
NSD1	0	28	1	38	1
NTRK3	0	28	0	39	1
NUP214	1	27	1	38	1
ODZ1	0	28	1	38	1
OR4C15	0	28	0	39	1
OR51S1	0	28	0	39	1
OR5L2	0	28	0	39	1
OR8H2	0	28	0	39	1
OR8K1	0	28	0	39	1
PAK7	2	26	2	37	1
PALB2	0	28	1	38	1
PCDH17	0	28	1	38	1
PCDHA1	0	28	1	38	1
PCDHA12	0	28	1	38	1
PCDHA2	0	28	0	39	1
PCDHA6	0	28	0	39	1
PCDHAC2	0	28	0	39	1
PCDHB11	0	28	1	38	1
PCDHB12	0	28	0	39	1
PCLO	2	26	2	37	1
PCM1	0	28	1	38	1
PDE4DIP	2	26	2	37	1
PDGFRA	0	28	1	38	1
PHKB	0	28	0	39	1
PHLPP1	1	27	2	37	1
PHLPP2	0	28	0	39	1
PIK3C2B	0	28	0	39	1
PIK3C2G	0	28	1	38	1
PIK3CB	0	28	1	38	1
PIK3R1	0	28	0	39	1
PLAG1	0	28	0	39	1
PLIN5	0	28	1	38	1
PLXNA1	0	28	0	39	1
PMS1	1	27	1	38	1
PMS2	0	28	1	38	1
POLQ	1	27	2	37	1
PPP1R9A	0	28	1	38	1
PRDM11	0	28	0	39	1
PRDM7	0	28	0	39	1
PRDM9	0	28	0	39	1
PROKR2	0	28	0	39	1
PTEN	0	28	0	39	1
PTK6	0	28	0	39	1
PZP	0	28	0	39	1
RAD51L1	0	28	1	38	1
RANBP17	0	28	0	39	1
RARG	0	28	1	38	1
RASA1	0	28	1	38	1
RB1	1	27	2	37	1
RECQL4	0	28	1	38	1
RELN	0	28	0	39	1
REST	1	27	2	37	1
RIMBP2	0	28	0	39	1
ROS1	0	28	1	38	1
RUFY1	0	28	1	38	1
RUNX1	0	28	1	38	1
SALL1	0	28	0	39	1
SBDS	0	28	1	38	1
SETBP1	0	28	0	39	1
SETD2	0	28	1	38	1
SFMBT2	0	28	0	39	1
SFRS14	0	28	1	38	1
SLC26A3	1	27	1	38	1
SLC2A13	0	28	0	39	1
SLCO5A1	0	28	0	39	1
SLITRK3	0	28	1	38	1
SMAD4	0	28	0	39	1
SMARCA4	0	28	0	39	1
SMC6	0	28	0	39	1
SMO	0	28	0	39	1
SPTBN4	0	28	1	38	1
SPTLC2	0	28	0	39	1
SRGAP3	0	28	1	38	1
SRPK2	0	28	1	38	1
STAT3	0	28	0	39	1
STYK1	0	28	0	39	1
TAP2	1	27	1	38	1
TET2	0	28	1	38	1
TMEM132D	0	28	1	38	1
TNFAIP3	0	28	1	38	1
TPM3	0	28	0	39	1
TPP2	1	27	1	38	1
TPRX1	2	26	2	37	1
TRAF3	0	28	1	38	1
TRIP11	0	28	1	38	1
TRRAP	1	27	2	37	1
TSC2	0	28	1	38	1
UBE3A	0	28	0	39	1
UBE4A	0	28	0	39	1
UNC5D	0	28	1	38	1
USH2A	2	26	3	36	1
USP26	0	28	1	38	1
VWA5A	0	28	0	39	1
WDR63	0	28	0	39	1
WHSC1	0	28	0	39	1
WHSC1L1	0	28	0	39	1
WRN	0	28	1	38	1
WT1	0	28	1	38	1
XPC	0	28	0	39	1
ZEB2	0	28	0	39	1
ZFHX4	3	25	4	35	1
ZNF180	0	28	0	39	1
ZNF19	0	28	0	39	1
ZNF217	0	28	1	38	1
ZNF426	0	28	1	38	1
ZNF433	0	28	0	39	1
ZNF439	0	28	1	38	1
ZNF440	0	28	0	39	1
ZNF443	0	28	0	39	1
ZNF461	0	28	1	38	1
ZNF501	0	28	1	38	1
ZNF521	2	26	2	37	1
ZNF534	0	28	0	39	1
ZNF571	0	28	0	39	1
ZNF665	0	28	1	38	1
ZNF761	0	28	0	39	1
ZNF790	0	28	1	38	1
ZNF823	0	28	0	39	1
ZNF83	0	28	1	38	1
Supplementary Table S2(D).3 Mutation event difference between large primary and small primary in HPV+ tumor samples
Gene Name	Mutation Event in Small Primary	No Mutation Event in Small Primary	Mutation Event in Large Primary	No Mutation Event in Large Primary	P Value
FLG	0	23	6	22	0.0265242
PIK3CA	2	21	9	19	0.084393
CYLD	3	20	0	28	0.085042
EZH2	3	20	0	28	0.085042
PKD1L1	3	20	0	28	0.085042
STAT1	3	20	0	28	0.085042
APOB	2	21	0	28	0.198431
E2F7	2	21	0	28	0.198431
FANCD2	2	21	0	28	0.198431
FAT2	2	21	0	28	0.198431
FLG2	2	21	0	28	0.198431
GRM8	2	21	0	28	0.198431
HRAS	2	21	0	28	0.198431
MYH4	2	21	0	28	0.198431
NKAPL	2	21	0	28	0.198431
NRG2	2	21	0	28	0.198431
RB1CC1	2	21	0	28	0.198431
TEX15	2	21	0	28	0.198431
TGFBR2	2	21	0	28	0.198431
ABCD2	0	23	3	25	0.242353
BBX	0	23	3	25	0.242353
KRAS	0	23	3	25	0.242353
SI	0	23	3	25	0.242353
TFRC	0	23	3	25	0.242353
DNAH5	3	20	1	27	0.315798
MLL3	3	20	1	27	0.315798
ADAMTS12	1	22	4	24	0.362185
HUWE1	1	22	4	24	0.362185
APC	1	22	0	28	0.45098
ARFGEF2	1	22	0	28	0.45098
BAGE2	1	22	0	28	0.45098
BBS9	1	22	0	28	0.45098
BCL9	1	22	0	28	0.45098
BIRC3	1	22	0	28	0.45098
BLM	1	22	0	28	0.45098
BRIP1	1	22	0	28	0.45098
C1orf173	1	22	0	28	0.45098
CABIN1	1	22	0	28	0.45098
CD8A	1	22	0	28	0.45098
CDH1	1	22	0	28	0.45098
CDH9	1	22	0	28	0.45098
CELSR3	1	22	0	28	0.45098
CHD5	1	22	0	28	0.45098
CLSTN2	1	22	0	28	0.45098
DST	1	22	0	28	0.45098
EBF1	1	22	0	28	0.45098
EPHB3	1	22	0	28	0.45098
ERAS	1	22	0	28	0.45098
ERBB3	1	22	0	28	0.45098
ETV6	1	22	0	28	0.45098
FAM5B	1	22	0	28	0.45098
FANCA	1	22	0	28	0.45098
FARP2	1	22	0	28	0.45098
FGFR4	1	22	0	28	0.45098
FLT3	1	22	0	28	0.45098
FSTL5	1	22	0	28	0.45098
HLA-B	1	22	0	28	0.45098
INPP4B	1	22	0	28	0.45098
IRF6	1	22	0	28	0.45098
ITK	1	22	0	28	0.45098
JAK1	1	22	0	28	0.45098
KDR	1	22	0	28	0.45098
KIAA2022	1	22	0	28	0.45098
KRTAP4-3	1	22	0	28	0.45098
MACF1	1	22	0	28	0.45098
MAP2	1	22	0	28	0.45098
MDM2	1	22	0	28	0.45098
MED1	1	22	0	28	0.45098
MYH11	1	22	0	28	0.45098
MYH2	1	22	0	28	0.45098
MYH6	1	22	0	28	0.45098
MYH7	1	22	0	28	0.45098
NAV3	1	22	0	28	0.45098
NBPF3	1	22	0	28	0.45098
NCOR1	1	22	0	28	0.45098
NELL2	1	22	0	28	0.45098
NKAP	1	22	0	28	0.45098
NONO	1	22	0	28	0.45098
NRAP	1	22	0	28	0.45098
OR8K1	1	22	0	28	0.45098
PARK2	1	22	0	28	0.45098
PCDHA13	1	22	0	28	0.45098
PCDHA8	1	22	0	28	0.45098
PDE3A	1	22	0	28	0.45098
PHIP	1	22	0	28	0.45098
PHLPP2	1	22	0	28	0.45098
PIK3C2A	1	22	0	28	0.45098
PIK3R2	1	22	0	28	0.45098
PKP4	1	22	0	28	0.45098
PLAG1	1	22	0	28	0.45098
PPP4R4	1	22	0	28	0.45098
PRDM7	1	22	0	28	0.45098
PRR21	1	22	0	28	0.45098
PTPRF	1	22	0	28	0.45098
RELN	1	22	0	28	0.45098
RGAG1	1	22	0	28	0.45098
RIMS2	1	22	0	28	0.45098
ROS1	1	22	0	28	0.45098
SLC2A13	1	22	0	28	0.45098
SMAD1	1	22	0	28	0.45098
SMO	1	22	0	28	0.45098
SPTLC2	1	22	0	28	0.45098
TAP2	1	22	0	28	0.45098
UBE3A	1	22	0	28	0.45098
UBE4A	1	22	0	28	0.45098
USP6	1	22	0	28	0.45098
VPS41	1	22	0	28	0.45098
XRCC6	1	22	0	28	0.45098
ZEB2	1	22	0	28	0.45098
ZNF790	1	22	0	28	0.45098
ZNF799	1	22	0	28	0.45098
CRIPAK	0	23	2	26	0.494902
DSCAM	0	23	2	26	0.494902
GPC5	0	23	2	26	0.494902
LRP1B	0	23	2	26	0.494902
MYH8	0	23	2	26	0.494902
PKHD1L1	0	23	2	26	0.494902
PRKCA	0	23	2	26	0.494902
SPAG17	0	23	2	26	0.494902
TP53	0	23	2	26	0.494902
TP63	0	23	2	26	0.494902
TTN	8	15	7	21	0.542379
AHNAK	2	21	1	27	0.582521
CUBN	2	21	1	27	0.582521
DSEL	2	21	1	27	0.582521
EPHA7	2	21	1	27	0.582521
NF1	2	21	1	27	0.582521
DNAH3	1	22	3	25	0.617311
EP300	1	22	3	25	0.617311
MTOR	1	22	3	25	0.617311
PEG3	3	20	2	26	0.647166
SYNE1	2	21	4	24	0.677847
ZFHX4	2	21	4	24	0.677847
FAT1	4	19	3	25	0.686796
FGFR3	4	19	3	25	0.686796
ABAT	0	23	1	27	1
ABCA12	0	23	0	28	1
ABCA4	0	23	0	28	1
ABCA6	0	23	0	28	1
ABCA9	0	23	0	28	1
ABHD13	0	23	1	27	1
ABL2	0	23	1	27	1
ACACB	0	23	1	27	1
ADAMTSL1	0	23	1	27	1
ADCY1	0	23	0	28	1
AIM1	0	23	0	28	1
AKAP1	0	23	0	28	1
AKT1	0	23	0	28	1
AKT3	0	23	0	28	1
AMD1	0	23	0	28	1
ANKHD1-EIF4EBP3	0	23	0	28	1
ANKRD17	0	23	0	28	1
ANO4	0	23	0	28	1
ARHGAP30	0	23	1	27	1
ARID1A	0	23	1	27	1
ASH1L	2	21	2	26	1
ASXL1	1	22	1	27	1
ATM	0	23	0	28	1
ATXN1	0	23	0	28	1
B2M	0	23	1	27	1
BAZ1B	0	23	0	28	1
BRCA1	0	23	1	27	1
BRCA2	1	22	2	26	1
BRD4	0	23	0	28	1
BTBD12	0	23	1	27	1
BZRAP1	0	23	0	28	1
CARD11	0	23	0	28	1
CASP8	0	23	1	27	1
CBL	0	23	0	28	1
CCNA1	0	23	0	28	1
CCR2	0	23	0	28	1
CCR5	0	23	0	28	1
CD248	0	23	0	28	1
CDH10	1	22	1	27	1
CDH11	0	23	1	27	1
CDH12	2	21	2	26	1
CDKN2A	0	23	0	28	1
CLCN4	0	23	1	27	1
CNGA3	0	23	0	28	1
CNTN6	1	22	2	26	1
CNTNAP2	0	23	1	27	1
COL11A1	2	21	2	26	1
COL22A1	0	23	0	28	1
COL6A3	1	22	2	26	1
COQ3	0	23	1	27	1
CREBBP	1	22	1	27	1
CSMD3	2	21	3	25	1
CTNNB1	0	23	0	28	1
CTNND2	1	22	2	26	1
CUL3	0	23	0	28	1
CYP26A1	0	23	1	27	1
DCC	0	23	0	28	1
DCT	0	23	1	27	1
DDR2	0	23	1	27	1
DDX3X	2	21	2	26	1
DGKG	0	23	0	28	1
DICER1	0	23	0	28	1
DOK6	0	23	0	28	1
DPYS	0	23	0	28	1
DSPP	0	23	1	27	1
DUSP5	0	23	1	27	1
DYRK1B	0	23	0	28	1
E2F3	0	23	0	28	1
EFCAB6	0	23	1	27	1
EGFR	0	23	0	28	1
ENPP2	0	23	0	28	1
EP400	0	23	1	27	1
EPHA1	0	23	0	28	1
EPHA2	1	22	1	27	1
EPHA3	0	23	0	28	1
EPHB1	0	23	1	27	1
EPM2AIP1	0	23	0	28	1
EPS8	0	23	0	28	1
ERBB4	0	23	1	27	1
ETV5	0	23	0	28	1
EWSR1	0	23	1	27	1
FAM135B	0	23	0	28	1
FAM179B	0	23	1	27	1
FANCG	0	23	1	27	1
FANCM	0	23	0	28	1
FAT4	1	22	1	27	1
FBXW7	1	22	1	27	1
FGFR1	0	23	0	28	1
FGFR2	1	22	1	27	1
FOXP1	0	23	0	28	1
GABRB3	0	23	0	28	1
GAS7	1	22	1	27	1
GC	0	23	0	28	1
GMPS	0	23	0	28	1
GNAQ	0	23	0	28	1
GPR174	0	23	1	27	1
HBS1L	0	23	0	28	1
HDX	0	23	0	28	1
HERC2	0	23	0	28	1
HLA-A	0	23	1	27	1
HSCB	0	23	1	27	1
HYDIN	0	23	1	27	1
IL6ST	0	23	0	28	1
INCENP	0	23	1	27	1
INO80	0	23	1	27	1
INPP4A	1	22	1	27	1
INPP5D	0	23	1	27	1
INTS3	0	23	0	28	1
JAK2	0	23	1	27	1
KCTD8	0	23	1	27	1
KDM5A	0	23	1	27	1
KEAP1	0	23	0	28	1
KIAA1468	0	23	1	27	1
KIAA1549	1	22	1	27	1
KIT	0	23	0	28	1
KRT10	0	23	1	27	1
KRTAP6-3	0	23	0	28	1
LAMB1	0	23	1	27	1
LILRA3	0	23	1	27	1
LILRA5	0	23	1	27	1
LILRB1	0	23	0	28	1
LILRB2	0	23	0	28	1
LOC200030	0	23	1	27	1
LOC642587	0	23	1	27	1
LRFN5	1	22	1	27	1
LRRC37B	0	23	1	27	1
LRRK2	0	23	0	28	1
LRRTM1	0	23	0	28	1
LRRTM3	0	23	0	28	1
LTBP1	0	23	0	28	1
MAML3	1	22	1	27	1
MAP3K1	0	23	0	28	1
MCOLN2	0	23	1	27	1
MECOM	0	23	0	28	1
MEF2C	0	23	0	28	1
MKL1	0	23	1	27	1
MLF1	0	23	1	27	1
MLL2	2	21	3	25	1
MLLT10	0	23	1	27	1
MMP16	0	23	1	27	1
MST1R	0	23	0	28	1
MTA2	0	23	0	28	1
MUC2	1	22	2	26	1
MUC21	0	23	0	28	1
MX2	0	23	1	27	1
MYC	0	23	1	27	1
MYH1	0	23	1	27	1
MYH13	0	23	1	27	1
MYH7B	0	23	1	27	1
MYH9	0	23	1	27	1
NACA2	0	23	0	28	1
NBPF1	0	23	0	28	1
NCOA3	0	23	0	28	1
NECAB1	0	23	0	28	1
NF2	0	23	0	28	1
NFATC3	0	23	0	28	1
NFE2L2	1	22	1	27	1
NLRP11	1	22	1	27	1
NLRP12	0	23	0	28	1
NLRP4	0	23	0	28	1
NOTCH1	2	21	2	26	1
NOTCH2	0	23	0	28	1
NOTCH3	0	23	0	28	1
NRAS	0	23	0	28	1
NRK	1	22	1	27	1
NRXN3	0	23	1	27	1
NSD1	0	23	1	27	1
NTRK3	0	23	0	28	1
NUMA1	0	23	0	28	1
NUP214	1	22	1	27	1
ODZ1	0	23	1	27	1
OR4C15	0	23	0	28	1
OR51S1	0	23	0	28	1
OR5L2	0	23	0	28	1
OR8H1	0	23	0	28	1
OR8H2	0	23	0	28	1
PAK7	1	22	1	27	1
PALB2	0	23	1	27	1
PBRM1	1	22	1	27	1
PCDH15	1	22	1	27	1
PCDH17	0	23	1	27	1
PCDHA1	0	23	1	27	1
PCDHA12	0	23	1	27	1
PCDHA2	0	23	0	28	1
PCDHA6	0	23	0	28	1
PCDHAC2	0	23	0	28	1
PCDHB11	0	23	1	27	1
PCDHB12	0	23	0	28	1
PCDHB4	0	23	0	28	1
PCLO	2	21	2	26	1
PCM1	0	23	0	28	1
PDE4DIP	1	22	1	27	1
PDGFRA	0	23	0	28	1
PHKA2	0	23	0	28	1
PHKB	0	23	0	28	1
PHLPP1	1	22	1	27	1
PIK3C2B	0	23	0	28	1
PIK3C2G	0	23	0	28	1
PIK3C3	1	22	2	26	1
PIK3CB	0	23	1	27	1
PIK3CG	0	23	0	28	1
PIK3R1	0	23	1	27	1
PKHD1	1	22	1	27	1
PLCB1	1	22	1	27	1
PLEC	0	23	1	27	1
PLIN5	0	23	0	28	1
PLXNA1	0	23	0	28	1
PMS1	0	23	1	27	1
PMS2	0	23	1	27	1
POLQ	1	22	2	26	1
PPP1R9A	0	23	1	27	1
PRDM11	0	23	0	28	1
PRDM9	0	23	0	28	1
PROKR2	0	23	0	28	1
PTEN	0	23	0	28	1
PTK6	0	23	0	28	1
PZP	0	23	0	28	1
RAD51L1	0	23	1	27	1
RANBP17	0	23	0	28	1
RARG	0	23	0	28	1
RASA1	0	23	1	27	1
RB1	1	22	2	26	1
RBM15	0	23	0	28	1
RECQL4	0	23	1	27	1
REST	1	22	2	26	1
RIMBP2	0	23	0	28	1
RIPK4	1	22	1	27	1
RUFY1	0	23	1	27	1
RUNX1	0	23	1	27	1
RXFP3	0	23	1	27	1
SALL1	0	23	0	28	1
SBDS	0	23	1	27	1
SETBP1	0	23	0	28	1
SETD2	0	23	0	28	1
SFMBT2	0	23	0	28	1
SFRS14	0	23	0	28	1
SLC26A3	1	22	1	27	1
SLCO5A1	0	23	0	28	1
SLITRK3	0	23	1	27	1
SMAD4	0	23	0	28	1
SMARCA4	0	23	0	28	1
SMC6	0	23	0	28	1
SPTA1	0	23	1	27	1
SPTBN4	0	23	1	27	1
SRGAP3	0	23	1	27	1
SRPK2	0	23	1	27	1
STAT3	0	23	0	28	1
STYK1	0	23	0	28	1
SYNE2	2	21	2	26	1
TDRD3	0	23	0	28	1
TET2	0	23	1	27	1
THSD7A	1	22	1	27	1
TMEM132D	0	23	1	27	1
TNFAIP3	0	23	1	27	1
TPM3	0	23	0	28	1
TPP2	1	22	1	27	1
TPRX1	1	22	2	26	1
TRAF3	1	22	1	27	1
TRIO	0	23	0	28	1
TRIP11	0	23	1	27	1
TRRAP	1	22	2	26	1
TSC1	0	23	1	27	1
TSC2	0	23	1	27	1
UBR5	1	22	1	27	1
UNC5D	0	23	1	27	1
USH2A	1	22	2	26	1
USP26	0	23	1	27	1
VWA5A	0	23	0	28	1
WBSCR17	0	23	0	28	1
WDR63	0	23	0	28	1
WHSC1	0	23	0	28	1
WHSC1L1	0	23	0	28	1
WRN	0	23	0	28	1
WT1	0	23	1	27	1
XPC	0	23	0	28	1
YTHDC1	0	23	0	28	1
ZNF180	0	23	0	28	1
ZNF19	0	23	0	28	1
ZNF217	0	23	1	27	1
ZNF426	0	23	1	27	1
ZNF433	0	23	0	28	1
ZNF439	0	23	0	28	1
ZNF440	0	23	0	28	1
ZNF443	0	23	0	28	1
ZNF461	0	23	1	27	1
ZNF501	0	23	1	27	1
ZNF521	1	22	1	27	1
ZNF534	0	23	0	28	1
ZNF571	0	23	0	28	1
ZNF665	0	23	1	27	1
ZNF699	0	23	0	28	1
ZNF761	0	23	0	28	1
ZNF804B	1	22	1	27	1
ZNF823	0	23	0	28	1
ZNF83	0	23	1	27	1
Supplementary Table S2(D).4 Mutation event difference between large primary and small primary in HPV+ oropharynx tumor samples
Gene Name	Mutation Event in Small Primary	No Mutation Event in Small Primary	Mutation Event in Large Primary	No Mutation Event in Large Primary	P Value
FLG	0	21	6	20	0.0264952
PIK3CA	2	19	9	17	0.0809291
CYLD	3	18	0	26	0.0820228
STAT1	3	18	0	26	0.0820228
EZH2	2	19	0	26	0.194265
FANCD2	2	19	0	26	0.194265
GRM8	2	19	0	26	0.194265
HRAS	2	19	0	26	0.194265
NKAPL	2	19	0	26	0.194265
NRG2	2	19	0	26	0.194265
PKD1L1	2	19	0	26	0.194265
TEX15	2	19	0	26	0.194265
TGFBR2	2	19	0	26	0.194265
ABCD2	0	21	3	23	0.242368
ADAMTS12	0	21	3	23	0.242368
BBX	0	21	3	23	0.242368
KRAS	0	21	3	23	0.242368
SI	0	21	3	23	0.242368
TFRC	0	21	3	23	0.242368
HUWE1	1	20	4	22	0.362263
SYNE1	1	20	4	22	0.362263
ZFHX4	1	20	4	22	0.362263
FGFR3	4	17	2	24	0.385569
APOB	1	20	0	26	0.446809
BAGE2	1	20	0	26	0.446809
BCL9	1	20	0	26	0.446809
BIRC3	1	20	0	26	0.446809
BLM	1	20	0	26	0.446809
BRIP1	1	20	0	26	0.446809
C1orf173	1	20	0	26	0.446809
CABIN1	1	20	0	26	0.446809
CD8A	1	20	0	26	0.446809
CDH1	1	20	0	26	0.446809
CHD5	1	20	0	26	0.446809
CLSTN2	1	20	0	26	0.446809
E2F7	1	20	0	26	0.446809
EBF1	1	20	0	26	0.446809
EPHB3	1	20	0	26	0.446809
ERAS	1	20	0	26	0.446809
ERBB3	1	20	0	26	0.446809
ETV6	1	20	0	26	0.446809
FARP2	1	20	0	26	0.446809
FAT2	1	20	0	26	0.446809
FGFR4	1	20	0	26	0.446809
FLG2	1	20	0	26	0.446809
FLT3	1	20	0	26	0.446809
FSTL5	1	20	0	26	0.446809
INPP4B	1	20	0	26	0.446809
IRF6	1	20	0	26	0.446809
KIAA2022	1	20	0	26	0.446809
KRTAP4-3	1	20	0	26	0.446809
MACF1	1	20	0	26	0.446809
MDM2	1	20	0	26	0.446809
MED1	1	20	0	26	0.446809
MYH2	1	20	0	26	0.446809
MYH4	1	20	0	26	0.446809
MYH6	1	20	0	26	0.446809
MYH7	1	20	0	26	0.446809
NBPF3	1	20	0	26	0.446809
NCOR1	1	20	0	26	0.446809
NKAP	1	20	0	26	0.446809
NONO	1	20	0	26	0.446809
PARK2	1	20	0	26	0.446809
PCDHA13	1	20	0	26	0.446809
PCDHA8	1	20	0	26	0.446809
PDE3A	1	20	0	26	0.446809
PHIP	1	20	0	26	0.446809
PIK3C2A	1	20	0	26	0.446809
PIK3R2	1	20	0	26	0.446809
PKP4	1	20	0	26	0.446809
PPP4R4	1	20	0	26	0.446809
PRR21	1	20	0	26	0.446809
PTPRF	1	20	0	26	0.446809
RB1CC1	1	20	0	26	0.446809
RGAG1	1	20	0	26	0.446809
RIMS2	1	20	0	26	0.446809
SMAD1	1	20	0	26	0.446809
TAP2	1	20	0	26	0.446809
USP6	1	20	0	26	0.446809
VPS41	1	20	0	26	0.446809
XRCC6	1	20	0	26	0.446809
ZNF799	1	20	0	26	0.446809
CNTN6	0	21	2	24	0.494912
COL6A3	0	21	2	24	0.494912
CRIPAK	0	21	2	24	0.494912
DSCAM	0	21	2	24	0.494912
GPC5	0	21	2	24	0.494912
MTOR	0	21	2	24	0.494912
MYH8	0	21	2	24	0.494912
PIK3C3	0	21	2	24	0.494912
PKHD1L1	0	21	2	24	0.494912
POLQ	0	21	2	24	0.494912
PRKCA	0	21	2	24	0.494912
SPAG17	0	21	2	24	0.494912
TP53	0	21	2	24	0.494912
TP63	0	21	2	24	0.494912
AHNAK	2	19	1	25	0.579093
ASH1L	2	19	1	25	0.579093
CUBN	2	19	1	25	0.579093
DDX3X	2	19	1	25	0.579093
DNAH5	2	19	1	25	0.579093
MLL3	2	19	1	25	0.579093
PEG3	2	19	1	25	0.579093
CSMD3	1	20	3	23	0.617358
DNAH3	1	20	3	23	0.617358
EP300	1	20	3	23	0.617358
FAT1	4	17	3	23	0.683844
TTN	7	14	7	19	0.751861
ABAT	0	21	1	25	1
ABCA12	0	21	0	26	1
ABCA4	0	21	0	26	1
ABCA6	0	21	0	26	1
ABCA9	0	21	0	26	1
ABHD13	0	21	1	25	1
ABL2	0	21	1	25	1
ACACB	0	21	1	25	1
ADAMTSL1	0	21	1	25	1
ADCY1	0	21	0	26	1
AIM1	0	21	0	26	1
AKAP1	0	21	0	26	1
AKT1	0	21	0	26	1
AKT3	0	21	0	26	1
AMD1	0	21	0	26	1
ANKHD1-EIF4EBP3	0	21	0	26	1
ANKRD17	0	21	0	26	1
ANO4	0	21	0	26	1
APC	0	21	0	26	1
ARFGEF2	0	21	0	26	1
ARHGAP30	0	21	1	25	1
ARID1A	0	21	1	25	1
ASXL1	1	20	1	25	1
ATM	0	21	0	26	1
ATXN1	0	21	0	26	1
B2M	0	21	1	25	1
BAZ1B	0	21	0	26	1
BBS9	0	21	0	26	1
BRCA1	0	21	0	26	1
BRCA2	1	20	2	24	1
BRD4	0	21	0	26	1
BTBD12	0	21	1	25	1
BZRAP1	0	21	0	26	1
CARD11	0	21	0	26	1
CASP8	0	21	1	25	1
CBL	0	21	0	26	1
CCNA1	0	21	0	26	1
CCR2	0	21	0	26	1
CCR5	0	21	0	26	1
CD248	0	21	0	26	1
CDH10	0	21	1	25	1
CDH11	0	21	1	25	1
CDH12	1	20	2	24	1
CDH9	0	21	0	26	1
CDKN2A	0	21	0	26	1
CELSR3	0	21	0	26	1
CLCN4	0	21	1	25	1
CNGA3	0	21	0	26	1
CNTNAP2	0	21	1	25	1
COL11A1	1	20	2	24	1
COL22A1	0	21	0	26	1
COQ3	0	21	1	25	1
CREBBP	0	21	1	25	1
CTNNB1	0	21	0	26	1
CTNND2	1	20	2	24	1
CUL3	0	21	0	26	1
CYP26A1	0	21	1	25	1
DCC	0	21	0	26	1
DCT	0	21	1	25	1
DDR2	0	21	1	25	1
DGKG	0	21	0	26	1
DICER1	0	21	0	26	1
DOK6	0	21	0	26	1
DPYS	0	21	0	26	1
DSEL	1	20	1	25	1
DSPP	0	21	1	25	1
DST	0	21	0	26	1
DUSP5	0	21	1	25	1
DYRK1B	0	21	0	26	1
E2F3	0	21	0	26	1
EFCAB6	0	21	1	25	1
EGFR	0	21	0	26	1
ENPP2	0	21	0	26	1
EP400	0	21	1	25	1
EPHA1	0	21	0	26	1
EPHA2	1	20	1	25	1
EPHA3	0	21	0	26	1
EPHA7	1	20	1	25	1
EPHB1	0	21	1	25	1
EPM2AIP1	0	21	0	26	1
EPS8	0	21	0	26	1
ERBB4	0	21	1	25	1
ETV5	0	21	0	26	1
EWSR1	0	21	1	25	1
FAM135B	0	21	0	26	1
FAM179B	0	21	1	25	1
FAM5B	0	21	0	26	1
FANCA	0	21	0	26	1
FANCG	0	21	1	25	1
FANCM	0	21	0	26	1
FAT4	0	21	1	25	1
FBXW7	1	20	1	25	1
FGFR1	0	21	0	26	1
FGFR2	1	20	1	25	1
FOXP1	0	21	0	26	1
GABRB3	0	21	0	26	1
GAS7	1	20	1	25	1
GC	0	21	0	26	1
GMPS	0	21	0	26	1
GNAQ	0	21	0	26	1
GPR174	0	21	1	25	1
HBS1L	0	21	0	26	1
HDX	0	21	0	26	1
HERC2	0	21	0	26	1
HLA-A	0	21	1	25	1
HLA-B	0	21	0	26	1
HSCB	0	21	1	25	1
HYDIN	0	21	1	25	1
IL6ST	0	21	0	26	1
INCENP	0	21	1	25	1
INO80	0	21	1	25	1
INPP4A	1	20	1	25	1
INPP5D	0	21	1	25	1
INTS3	0	21	0	26	1
ITK	0	21	0	26	1
JAK1	0	21	0	26	1
JAK2	0	21	1	25	1
KCTD8	0	21	1	25	1
KDM5A	0	21	1	25	1
KDR	0	21	0	26	1
KEAP1	0	21	0	26	1
KIAA1468	0	21	1	25	1
KIAA1549	0	21	1	25	1
KIT	0	21	0	26	1
KRT10	0	21	0	26	1
KRTAP6-3	0	21	0	26	1
LAMB1	0	21	1	25	1
LILRA3	0	21	1	25	1
LILRA5	0	21	1	25	1
LILRB1	0	21	0	26	1
LILRB2	0	21	0	26	1
LOC200030	0	21	1	25	1
LOC642587	0	21	1	25	1
LRFN5	0	21	1	25	1
LRP1B	0	21	1	25	1
LRRC37B	0	21	1	25	1
LRRK2	0	21	0	26	1
LRRTM1	0	21	0	26	1
LRRTM3	0	21	0	26	1
LTBP1	0	21	0	26	1
MAML3	1	20	1	25	1
MAP2	0	21	0	26	1
MAP3K1	0	21	0	26	1
MCOLN2	0	21	1	25	1
MECOM	0	21	0	26	1
MEF2C	0	21	0	26	1
MKL1	0	21	1	25	1
MLF1	0	21	0	26	1
MLL2	2	19	3	23	1
MLLT10	0	21	1	25	1
MMP16	0	21	1	25	1
MST1R	0	21	0	26	1
MTA2	0	21	0	26	1
MUC2	1	20	2	24	1
MUC21	0	21	0	26	1
MX2	0	21	1	25	1
MYC	0	21	1	25	1
MYH1	0	21	1	25	1
MYH11	0	21	0	26	1
MYH13	0	21	1	25	1
MYH7B	0	21	1	25	1
MYH9	0	21	1	25	1
NACA2	0	21	0	26	1
NAV3	0	21	0	26	1
NBPF1	0	21	0	26	1
NCOA3	0	21	0	26	1
NECAB1	0	21	0	26	1
NELL2	0	21	0	26	1
NF1	1	20	1	25	1
NF2	0	21	0	26	1
NFATC3	0	21	0	26	1
NFE2L2	1	20	1	25	1
NLRP11	1	20	1	25	1
NLRP12	0	21	0	26	1
NLRP4	0	21	0	26	1
NOTCH1	2	19	2	24	1
NOTCH2	0	21	0	26	1
NOTCH3	0	21	0	26	1
NRAP	0	21	0	26	1
NRAS	0	21	0	26	1
NRK	1	20	1	25	1
NRXN3	0	21	1	25	1
NSD1	0	21	1	25	1
NTRK3	0	21	0	26	1
NUMA1	0	21	0	26	1
NUP214	1	20	1	25	1
ODZ1	0	21	1	25	1
OR4C15	0	21	0	26	1
OR51S1	0	21	0	26	1
OR5L2	0	21	0	26	1
OR8H1	0	21	0	26	1
OR8H2	0	21	0	26	1
OR8K1	0	21	0	26	1
PAK7	1	20	1	25	1
PALB2	0	21	1	25	1
PBRM1	0	21	1	25	1
PCDH15	1	20	1	25	1
PCDH17	0	21	1	25	1
PCDHA1	0	21	1	25	1
PCDHA12	0	21	1	25	1
PCDHA2	0	21	0	26	1
PCDHA6	0	21	0	26	1
PCDHAC2	0	21	0	26	1
PCDHB11	0	21	1	25	1
PCDHB12	0	21	0	26	1
PCDHB4	0	21	0	26	1
PCLO	1	20	2	24	1
PCM1	0	21	0	26	1
PDE4DIP	1	20	1	25	1
PDGFRA	0	21	0	26	1
PHKA2	0	21	0	26	1
PHKB	0	21	0	26	1
PHLPP1	1	20	1	25	1
PHLPP2	0	21	0	26	1
PIK3C2B	0	21	0	26	1
PIK3C2G	0	21	0	26	1
PIK3CB	0	21	1	25	1
PIK3CG	0	21	0	26	1
PIK3R1	0	21	0	26	1
PKHD1	0	21	1	25	1
PLAG1	0	21	0	26	1
PLCB1	1	20	1	25	1
PLEC	0	21	1	25	1
PLIN5	0	21	0	26	1
PLXNA1	0	21	0	26	1
PMS1	0	21	1	25	1
PMS2	0	21	1	25	1
PPP1R9A	0	21	1	25	1
PRDM11	0	21	0	26	1
PRDM7	0	21	0	26	1
PRDM9	0	21	0	26	1
PROKR2	0	21	0	26	1
PTEN	0	21	0	26	1
PTK6	0	21	0	26	1
PZP	0	21	0	26	1
RAD51L1	0	21	1	25	1
RANBP17	0	21	0	26	1
RARG	0	21	0	26	1
RASA1	0	21	1	25	1
RB1	1	20	2	24	1
RBM15	0	21	0	26	1
RECQL4	0	21	1	25	1
RELN	0	21	0	26	1
REST	1	20	2	24	1
RIMBP2	0	21	0	26	1
RIPK4	0	21	1	25	1
ROS1	0	21	0	26	1
RUFY1	0	21	1	25	1
RUNX1	0	21	1	25	1
RXFP3	0	21	1	25	1
SALL1	0	21	0	26	1
SBDS	0	21	1	25	1
SETBP1	0	21	0	26	1
SETD2	0	21	0	26	1
SFMBT2	0	21	0	26	1
SFRS14	0	21	0	26	1
SLC26A3	0	21	1	25	1
SLC2A13	0	21	0	26	1
SLCO5A1	0	21	0	26	1
SLITRK3	0	21	1	25	1
SMAD4	0	21	0	26	1
SMARCA4	0	21	0	26	1
SMC6	0	21	0	26	1
SMO	0	21	0	26	1
SPTA1	0	21	1	25	1
SPTBN4	0	21	1	25	1
SPTLC2	0	21	0	26	1
SRGAP3	0	21	1	25	1
SRPK2	0	21	1	25	1
STAT3	0	21	0	26	1
STYK1	0	21	0	26	1
SYNE2	2	19	2	24	1
TDRD3	0	21	0	26	1
TET2	0	21	1	25	1
THSD7A	1	20	1	25	1
TMEM132D	0	21	1	25	1
TNFAIP3	0	21	1	25	1
TPM3	0	21	0	26	1
TPP2	1	20	1	25	1
TPRX1	1	20	2	24	1
TRAF3	0	21	1	25	1
TRIO	0	21	0	26	1
TRIP11	0	21	1	25	1
TRRAP	1	20	2	24	1
TSC1	0	21	1	25	1
TSC2	0	21	1	25	1
UBE3A	0	21	0	26	1
UBE4A	0	21	0	26	1
UBR5	1	20	1	25	1
UNC5D	0	21	1	25	1
USH2A	1	20	2	24	1
USP26	0	21	1	25	1
VWA5A	0	21	0	26	1
WBSCR17	0	21	0	26	1
WDR63	0	21	0	26	1
WHSC1	0	21	0	26	1
WHSC1L1	0	21	0	26	1
WRN	0	21	0	26	1
WT1	0	21	1	25	1
XPC	0	21	0	26	1
YTHDC1	0	21	0	26	1
ZEB2	0	21	0	26	1
ZNF180	0	21	0	26	1
ZNF19	0	21	0	26	1
ZNF217	0	21	1	25	1
ZNF426	0	21	1	25	1
ZNF433	0	21	0	26	1
ZNF439	0	21	0	26	1
ZNF440	0	21	0	26	1
ZNF443	0	21	0	26	1
ZNF461	0	21	1	25	1
ZNF501	0	21	1	25	1
ZNF521	1	20	1	25	1
ZNF534	0	21	0	26	1
ZNF571	0	21	0	26	1
ZNF665	0	21	1	25	1
ZNF699	0	21	0	26	1
ZNF761	0	21	0	26	1
ZNF790	0	21	0	26	1
ZNF804B	1	20	1	25	1
ZNF823	0	21	0	26	1
ZNF83	0	21	1	25	1
Supplementary Table S2(D).5 Mutation event difference between large primary and small primary in HPV- tumor samples
Gene Name	Mutation Event in Small Primary	No Mutation Event in Small Primary	Mutation Event in Large Primary	No Mutation Event in Large Primary	P Value
DSPP	2	14	0	53	0.0511509
POLQ	2	14	0	53	0.0511509
TTN	9	7	16	37	0.0771653
CDH9	0	16	7	46	0.188371
APOB	2	14	2	51	0.227715
C1orf173	2	14	2	51	0.227715
CUL3	2	14	2	51	0.227715
DDR2	2	14	2	51	0.227715
NOTCH3	2	14	2	51	0.227715
ANO4	1	15	0	53	0.231884
BRIP1	1	15	0	53	0.231884
CBL	1	15	0	53	0.231884
CD248	1	15	0	53	0.231884
EPHA7	1	15	0	53	0.231884
EPM2AIP1	1	15	0	53	0.231884
GAS7	1	15	0	53	0.231884
GPC5	1	15	0	53	0.231884
IL6ST	1	15	0	53	0.231884
KCTD8	1	15	0	53	0.231884
LILRB1	1	15	0	53	0.231884
LTBP1	1	15	0	53	0.231884
MTA2	1	15	0	53	0.231884
NECAB1	1	15	0	53	0.231884
NFE2L2	1	15	0	53	0.231884
NRG2	1	15	0	53	0.231884
NTRK3	1	15	0	53	0.231884
OR51S1	1	15	0	53	0.231884
OR8H1	1	15	0	53	0.231884
PCDHA2	1	15	0	53	0.231884
PCDHA8	1	15	0	53	0.231884
PCDHB4	1	15	0	53	0.231884
PHKA2	1	15	0	53	0.231884
PROKR2	1	15	0	53	0.231884
RBM15	1	15	0	53	0.231884
SLC26A3	1	15	0	53	0.231884
SMC6	1	15	0	53	0.231884
TDRD3	1	15	0	53	0.231884
ZNF699	1	15	0	53	0.231884
ZNF799	1	15	0	53	0.231884
PCDH15	0	16	6	47	0.32386
AHNAK	2	14	3	50	0.327768
PIK3CG	2	14	3	50	0.327768
RB1CC1	2	14	3	50	0.327768
ZNF804B	2	14	3	50	0.327768
FLG	3	13	5	48	0.375565
PIK3CA	3	13	5	48	0.375565
ABCA9	1	15	1	52	0.412617
CARD11	1	15	1	52	0.412617
DOK6	1	15	1	52	0.412617
DSCAM	1	15	1	52	0.412617
FAT4	1	15	1	52	0.412617
LRFN5	1	15	1	52	0.412617
NF1	1	15	1	52	0.412617
NUMA1	1	15	1	52	0.412617
PAK7	1	15	1	52	0.412617
PLCB1	1	15	1	52	0.412617
PMS1	1	15	1	52	0.412617
PTPRF	1	15	1	52	0.412617
RGAG1	1	15	1	52	0.412617
SLCO5A1	1	15	1	52	0.412617
TRIO	1	15	1	52	0.412617
TSC1	1	15	1	52	0.412617
WBSCR17	1	15	1	52	0.412617
WDR63	1	15	1	52	0.412617
YTHDC1	1	15	1	52	0.412617
NOTCH1	1	15	10	43	0.436271
CSMD3	6	10	14	39	0.530245
CDH12	1	15	2	51	0.552888
COL11A1	1	15	2	51	0.552888
CUBN	1	15	2	51	0.552888
FAM179B	1	15	2	51	0.552888
TPRX1	1	15	2	51	0.552888
CNTNAP2	0	16	4	49	0.566437
FAM135B	0	16	4	49	0.566437
FBXW7	0	16	4	49	0.566437
KEAP1	0	16	4	49	0.566437
MACF1	0	16	4	49	0.566437
MAP2	0	16	4	49	0.566437
MLL3	0	16	4	49	0.566437
MYH8	0	16	4	49	0.566437
NAV3	0	16	4	49	0.566437
DNAH5	0	16	5	48	0.583112
FAT2	0	16	5	48	0.583112
PIK3C2G	0	16	5	48	0.583112
UBR5	2	14	4	49	0.616984
SI	2	14	5	48	0.659542
SPTA1	2	14	5	48	0.659542
ZFHX4	3	13	7	46	0.68721
MLL2	3	13	8	45	0.708416
PCLO	1	15	3	50	1
PDE3A	1	15	3	50	1
PDE4DIP	1	15	3	50	1
RELN	1	15	3	50	1
THSD7A	1	15	3	50	1
ZNF521	1	15	3	50	1
ABCA12	0	16	3	50	1
ABCA4	0	16	2	51	1
ABCA6	0	16	2	51	1
ABHD13	0	16	0	53	1
ACACB	0	16	0	53	1
ADAMTS12	0	16	3	50	1
ADAMTSL1	0	16	0	53	1
ARFGEF2	0	16	0	53	1
ASH1L	0	16	2	51	1
B2M	0	16	0	53	1
BBS9	0	16	0	53	1
BCL9	0	16	0	53	1
BIRC3	0	16	0	53	1
BRCA1	0	16	0	53	1
CABIN1	0	16	0	53	1
CASP8	0	16	2	51	1
CD8A	0	16	0	53	1
CDH1	0	16	0	53	1
CDH10	0	16	0	53	1
CDKN2A	3	13	10	43	1
CELSR3	0	16	2	51	1
CHD5	0	16	0	53	1
CLCN4	0	16	0	53	1
CLSTN2	0	16	0	53	1
CNTN6	0	16	2	51	1
CREBBP	0	16	0	53	1
CRIPAK	0	16	0	53	1
CTNND2	0	16	0	53	1
CYP26A1	0	16	0	53	1
DCT	0	16	0	53	1
DDX3X	0	16	0	53	1
DICER1	0	16	3	50	1
DUSP5	0	16	0	53	1
E2F7	0	16	0	53	1
EGFR	0	16	2	51	1
EP300	0	16	2	51	1
EP400	0	16	0	53	1
EPHA2	0	16	2	51	1
EPHA3	0	16	3	50	1
EPHB1	0	16	0	53	1
EPHB3	0	16	0	53	1
ERAS	0	16	0	53	1
ERBB3	0	16	0	53	1
ERBB4	0	16	2	51	1
ETV6	0	16	0	53	1
EWSR1	0	16	0	53	1
EZH2	0	16	0	53	1
FAM5B	0	16	0	53	1
FANCD2	0	16	0	53	1
FANCG	0	16	0	53	1
FARP2	0	16	0	53	1
FAT1	2	14	6	47	1
FGFR2	0	16	0	53	1
FGFR3	0	16	0	53	1
FGFR4	0	16	0	53	1
FLG2	0	16	0	53	1
GRM8	0	16	2	51	1
HBS1L	0	16	0	53	1
HDX	0	16	3	50	1
HLA-A	0	16	0	53	1
HLA-B	0	16	0	53	1
HRAS	0	16	2	51	1
HSCB	0	16	0	53	1
HUWE1	1	15	4	49	1
HYDIN	0	16	2	51	1
INCENP	0	16	0	53	1
INO80	0	16	0	53	1
INPP4A	0	16	2	51	1
INPP4B	0	16	3	50	1
INPP5D	0	16	0	53	1
ITK	0	16	0	53	1
JAK1	0	16	0	53	1
KDM5A	0	16	0	53	1
KDR	0	16	2	51	1
KIAA1549	0	16	2	51	1
KRT10	0	16	0	53	1
KRTAP4-3	0	16	0	53	1
LAMB1	0	16	0	53	1
LILRA3	0	16	0	53	1
LILRA5	0	16	0	53	1
LOC200030	0	16	0	53	1
LOC642587	0	16	0	53	1
LRP1B	2	14	8	45	1
LRRC37B	0	16	0	53	1
LRRTM1	0	16	2	51	1
MAML3	0	16	2	51	1
MCOLN2	0	16	0	53	1
MDM2	0	16	0	53	1
MEF2C	0	16	2	51	1
MKL1	0	16	0	53	1
MLF1	0	16	0	53	1
MLLT10	0	16	0	53	1
MMP16	0	16	0	53	1
MTOR	0	16	3	50	1
MX2	0	16	0	53	1
MYC	0	16	0	53	1
MYH1	0	16	2	51	1
MYH13	0	16	3	50	1
MYH4	0	16	0	53	1
MYH6	0	16	0	53	1
MYH7	0	16	0	53	1
MYH7B	0	16	0	53	1
NBPF1	0	16	2	51	1
NBPF3	0	16	0	53	1
NCOR1	0	16	2	51	1
NELL2	0	16	0	53	1
NKAP	0	16	0	53	1
NLRP11	0	16	0	53	1
NLRP4	0	16	2	51	1
NONO	0	16	0	53	1
NOTCH2	1	15	4	49	1
NRK	0	16	0	53	1
NSD1	1	15	5	48	1
NUP214	0	16	0	53	1
ODZ1	0	16	3	50	1
OR8K1	0	16	0	53	1
PALB2	0	16	0	53	1
PARK2	0	16	0	53	1
PCDH17	0	16	0	53	1
PCDHA1	0	16	0	53	1
PCDHA12	0	16	0	53	1
PCDHA13	0	16	0	53	1
PCDHB11	0	16	2	51	1
PEG3	0	16	0	53	1
PHIP	0	16	0	53	1
PHLPP2	0	16	0	53	1
PIK3C2A	0	16	0	53	1
PIK3C3	0	16	0	53	1
PIK3R1	0	16	0	53	1
PIK3R2	0	16	0	53	1
PKHD1	0	16	2	51	1
PKHD1L1	2	14	8	45	1
PLAG1	0	16	0	53	1
PLEC	0	16	2	51	1
PMS2	0	16	0	53	1
PPP1R9A	0	16	0	53	1
PRDM7	0	16	0	53	1
PRDM9	0	16	2	51	1
PRKCA	0	16	0	53	1
PRR21	0	16	0	53	1
PTK6	0	16	0	53	1
PZP	0	16	2	51	1
RAD51L1	0	16	0	53	1
RASA1	0	16	2	51	1
RECQL4	0	16	0	53	1
REST	0	16	0	53	1
RIPK4	0	16	2	51	1
ROS1	0	16	3	50	1
RUFY1	0	16	0	53	1
RUNX1	0	16	0	53	1
SBDS	0	16	0	53	1
SETBP1	0	16	2	51	1
SFRS14	0	16	2	51	1
SMAD1	0	16	0	53	1
SMO	0	16	0	53	1
SPTBN4	0	16	0	53	1
SPTLC2	0	16	0	53	1
SRGAP3	0	16	0	53	1
STAT1	0	16	0	53	1
SYNE1	3	13	12	41	1
SYNE2	1	15	5	48	1
TET2	0	16	2	51	1
TEX15	0	16	0	53	1
TFRC	0	16	0	53	1
TMEM132D	0	16	3	50	1
TNFAIP3	0	16	0	53	1
TP53	13	3	41	12	1
TRAF3	0	16	0	53	1
TRIP11	0	16	0	53	1
TRRAP	0	16	0	53	1
TSC2	0	16	0	53	1
UBE3A	0	16	0	53	1
UBE4A	0	16	0	53	1
UNC5D	0	16	3	50	1
USH2A	2	14	8	45	1
[truncated: 592 more rows]

## Sheet: S2(E) Node(+) vs. Node(-)
Supplementary Table S2(E).1 Mutation event difference between node(+) and node(-) in all tumor samples
Gene Name	Mutation Event in node(-)	No Mutation Event in node(-)	Mutation Event in node(+)	No Mutation Event in node(+)	P Value
AKAP1	1	9	0	110	0.0833333
INCENP	1	9	0	110	0.0833333
KDM5A	1	9	0	110	0.0833333
LRRTM3	1	9	0	110	0.0833333
MAP3K1	1	9	0	110	0.0833333
MST1R	1	9	0	110	0.0833333
NCOA3	1	9	0	110	0.0833333
NF2	1	9	0	110	0.0833333
OR5L2	1	9	0	110	0.0833333
PHKB	1	9	0	110	0.0833333
SMARCA4	1	9	0	110	0.0833333
ZNF534	1	9	0	110	0.0833333
ZNF571	1	9	0	110	0.0833333
FAT1	3	7	12	98	0.110866
AHNAK	2	8	6	104	0.133694
ABCA6	1	9	1	109	0.160364
APC	1	9	1	109	0.160364
NBPF1	1	9	1	109	0.160364
SFRS14	1	9	1	109	0.160364
SLCO5A1	1	9	1	109	0.160364
SLITRK3	1	9	1	109	0.160364
VWA5A	1	9	1	109	0.160364
WRN	1	9	1	109	0.160364
YTHDC1	1	9	1	109	0.160364
CASP8	1	9	2	108	0.23152
DSPP	1	9	2	108	0.23152
GPC5	1	9	2	108	0.23152
NKAPL	1	9	2	108	0.23152
SPAG17	1	9	2	108	0.23152
CDKN2A	2	8	11	99	0.295688
COL6A3	1	9	3	107	0.297202
FAM135B	1	9	3	107	0.297202
HRAS	1	9	3	107	0.297202
INPP4B	1	9	3	107	0.297202
KRAS	1	9	3	107	0.297202
MAML3	1	9	3	107	0.297202
MYH13	1	9	3	107	0.297202
NOTCH3	1	9	3	107	0.297202
RB1	1	9	3	107	0.297202
RIPK4	1	9	3	107	0.297202
TMEM132D	1	9	3	107	0.297202
TTN	5	5	35	75	0.29818
FLG	2	8	12	98	0.329466
MLL2	0	10	16	94	0.35496
CNTN6	1	9	4	106	0.357788
CNTNAP2	1	9	4	106	0.357788
MACF1	1	9	4	106	0.357788
NOTCH2	1	9	4	106	0.357788
RELN	1	9	4	106	0.357788
CUBN	1	9	5	105	0.413632
EP300	1	9	5	105	0.413632
PDE4DIP	1	9	5	105	0.413632
THSD7A	1	9	5	105	0.413632
CDH12	1	9	6	104	0.465068
COL11A1	1	9	6	104	0.465068
FGFR3	1	9	6	104	0.465068
ZNF804B	1	9	6	104	0.465068
MLL3	1	9	7	103	0.512407
PCDH15	1	9	7	103	0.512407
DNAH5	1	9	8	102	0.555942
NOTCH1	2	8	13	97	0.611644
PIK3CA	2	8	17	93	0.658149
ABAT	0	10	2	108	1
ABCA12	0	10	3	107	1
ABCA4	0	10	2	108	1
ABCA9	0	10	2	108	1
ABCD2	0	10	4	106	1
ABHD13	0	10	1	109	1
ABL2	0	10	2	108	1
ACACB	0	10	1	109	1
ADAMTS12	0	10	8	102	1
ADAMTSL1	0	10	1	109	1
ADCY1	0	10	1	109	1
AIM1	0	10	1	109	1
AKT1	0	10	1	109	1
AKT3	0	10	1	109	1
AMD1	0	10	1	109	1
ANKHD1-EIF4EBP3	0	10	1	109	1
ANKRD17	0	10	1	109	1
ANO4	0	10	1	109	1
APOB	0	10	6	104	1
ARFGEF2	0	10	1	109	1
ARHGAP30	0	10	2	108	1
ARID1A	0	10	2	108	1
ASH1L	0	10	6	104	1
ASXL1	0	10	3	107	1
ATM	0	10	1	109	1
ATXN1	0	10	1	109	1
B2M	0	10	1	109	1
BAGE2	0	10	2	108	1
BAZ1B	0	10	1	109	1
BBS9	0	10	1	109	1
BBX	0	10	4	106	1
BCL9	0	10	1	109	1
BIRC3	0	10	1	109	1
BLM	0	10	2	108	1
BRCA1	0	10	1	109	1
BRCA2	0	10	4	106	1
BRD4	0	10	1	109	1
BRIP1	0	10	2	108	1
BTBD12	0	10	2	108	1
BZRAP1	0	10	1	109	1
C1orf173	0	10	5	105	1
CABIN1	0	10	1	109	1
CARD11	0	10	2	108	1
CBL	0	10	1	109	1
CCNA1	0	10	1	109	1
CCR2	0	10	1	109	1
CCR5	0	10	1	109	1
CD248	0	10	1	109	1
CD8A	0	10	1	109	1
CDH1	0	10	1	109	1
CDH10	0	10	2	108	1
CDH11	0	10	2	108	1
CDH9	0	10	8	102	1
CELSR3	0	10	3	107	1
CHD5	0	10	1	109	1
CLCN4	0	10	1	109	1
CLSTN2	0	10	1	109	1
CNGA3	0	10	1	109	1
COL22A1	0	10	1	109	1
COQ3	0	10	2	108	1
CREBBP	0	10	2	108	1
CRIPAK	0	10	2	108	1
CSMD3	2	8	23	87	1
CTNNB1	0	10	1	109	1
CTNND2	0	10	3	107	1
CUL3	0	10	4	106	1
CYLD	0	10	4	106	1
CYP26A1	0	10	1	109	1
DCC	0	10	1	109	1
DCT	0	10	1	109	1
DDR2	0	10	5	105	1
DDX3X	0	10	4	106	1
DGKG	0	10	1	109	1
DICER1	0	10	3	107	1
DNAH3	0	10	5	105	1
DOK6	0	10	2	108	1
DPYS	0	10	1	109	1
DSCAM	0	10	4	106	1
DSEL	0	10	4	106	1
DST	0	10	2	108	1
DUSP5	0	10	1	109	1
DYRK1B	0	10	1	109	1
E2F3	0	10	1	109	1
E2F7	0	10	2	108	1
EBF1	0	10	2	108	1
EFCAB6	0	10	2	108	1
EGFR	0	10	2	108	1
ENPP2	0	10	1	109	1
EP400	0	10	1	109	1
EPHA1	0	10	1	109	1
EPHA2	0	10	4	106	1
EPHA3	0	10	3	107	1
EPHA7	0	10	4	106	1
EPHB1	0	10	1	109	1
EPHB3	0	10	1	109	1
EPM2AIP1	0	10	1	109	1
EPS8	0	10	1	109	1
ERAS	0	10	1	109	1
ERBB3	0	10	1	109	1
ERBB4	0	10	3	107	1
ETV5	0	10	1	109	1
ETV6	0	10	1	109	1
EWSR1	0	10	1	109	1
EZH2	0	10	3	107	1
FAM179B	0	10	4	106	1
FAM5B	0	10	1	109	1
FANCA	0	10	2	108	1
FANCD2	0	10	2	108	1
FANCG	0	10	1	109	1
FANCM	0	10	1	109	1
FARP2	0	10	1	109	1
FAT2	0	10	7	103	1
FAT4	0	10	4	106	1
FBXW7	0	10	6	104	1
FGFR1	0	10	1	109	1
FGFR2	0	10	2	108	1
FGFR4	0	10	1	109	1
FLG2	0	10	2	108	1
FLT3	0	10	2	108	1
FOXP1	0	10	1	109	1
FSTL5	0	10	2	108	1
GABRB3	0	10	1	109	1
GAS7	0	10	3	107	1
GC	0	10	1	109	1
GMPS	0	10	1	109	1
GNAQ	0	10	1	109	1
GPR174	0	10	2	108	1
GRM8	0	10	4	106	1
HBS1L	0	10	0	110	1
HDX	0	10	3	107	1
HERC2	0	10	1	109	1
HLA-A	0	10	1	109	1
HLA-B	0	10	1	109	1
HSCB	0	10	1	109	1
HUWE1	0	10	10	100	1
HYDIN	0	10	3	107	1
IL6ST	0	10	1	109	1
INO80	0	10	1	109	1
INPP4A	0	10	4	106	1
INPP5D	0	10	1	109	1
INTS3	0	10	1	109	1
IRF6	0	10	2	108	1
ITK	0	10	1	109	1
JAK1	0	10	1	109	1
JAK2	0	10	2	108	1
KCTD8	0	10	2	108	1
KDR	0	10	3	107	1
KEAP1	0	10	4	106	1
KIAA1468	0	10	2	108	1
KIAA1549	0	10	4	106	1
KIAA2022	0	10	2	108	1
KIT	0	10	1	109	1
KRT10	0	10	1	109	1
KRTAP4-3	0	10	1	109	1
KRTAP6-3	0	10	1	109	1
LAMB1	0	10	1	109	1
LILRA3	0	10	1	109	1
LILRA5	0	10	1	109	1
LILRB1	0	10	1	109	1
LILRB2	0	10	1	109	1
LOC200030	0	10	1	109	1
LOC642587	0	10	1	109	1
LRFN5	0	10	4	106	1
LRP1B	1	9	11	99	1
LRRC37B	0	10	1	109	1
LRRK2	0	10	1	109	1
LRRTM1	0	10	2	108	1
LTBP1	0	10	1	109	1
MAP2	0	10	5	105	1
MCOLN2	0	10	1	109	1
MDM2	0	10	1	109	1
MECOM	0	10	1	109	1
MED1	0	10	2	108	1
MEF2C	0	10	2	108	1
MKL1	0	10	1	109	1
MLF1	0	10	1	109	1
MLLT10	0	10	1	109	1
MMP16	0	10	1	109	1
MTA2	0	10	1	109	1
MTOR	0	10	7	103	1
MUC2	0	10	4	106	1
MUC21	0	10	1	109	1
MX2	0	10	1	109	1
MYC	0	10	1	109	1
MYH1	0	10	3	107	1
MYH11	0	10	2	108	1
MYH2	0	10	2	108	1
MYH4	0	10	2	108	1
MYH6	0	10	1	109	1
MYH7	0	10	1	109	1
MYH7B	0	10	1	109	1
MYH8	0	10	6	104	1
MYH9	0	10	2	108	1
NACA2	0	10	1	109	1
NAV3	0	10	5	105	1
NBPF3	0	10	1	109	1
NCOR1	0	10	3	107	1
NECAB1	0	10	1	109	1
NELL2	0	10	1	109	1
NF1	0	10	5	105	1
NFATC3	0	10	1	109	1
NFE2L2	0	10	3	107	1
NKAP	0	10	1	109	1
NLRP11	0	10	2	108	1
NLRP12	0	10	1	109	1
NLRP4	0	10	2	108	1
NONO	0	10	1	109	1
NRAP	0	10	2	108	1
NRAS	0	10	1	109	1
NRG2	0	10	3	107	1
NRK	0	10	2	108	1
NRXN3	0	10	2	108	1
NSD1	0	10	7	103	1
NTRK3	0	10	1	109	1
NUMA1	0	10	2	108	1
NUP214	0	10	2	108	1
ODZ1	0	10	4	106	1
OR4C15	0	10	1	109	1
OR51S1	0	10	1	109	1
OR8H1	0	10	1	109	1
OR8H2	0	10	1	109	1
OR8K1	0	10	1	109	1
PAK7	0	10	4	106	1
PALB2	0	10	1	109	1
PARK2	0	10	1	109	1
PBRM1	0	10	3	107	1
PCDH17	0	10	1	109	1
PCDHA1	0	10	1	109	1
PCDHA12	0	10	1	109	1
PCDHA13	0	10	1	109	1
PCDHA2	0	10	1	109	1
PCDHA6	0	10	1	109	1
PCDHA8	0	10	2	108	1
PCDHAC2	0	10	1	109	1
PCDHB11	0	10	3	107	1
PCDHB12	0	10	1	109	1
PCDHB4	0	10	1	109	1
PCLO	0	10	8	102	1
PCM1	0	10	1	109	1
PDE3A	0	10	5	105	1
PDGFRA	0	10	1	109	1
PEG3	0	10	5	105	1
PHIP	0	10	1	109	1
PHKA2	0	10	1	109	1
PHLPP1	0	10	3	107	1
PHLPP2	0	10	1	109	1
PIK3C2A	0	10	1	109	1
PIK3C2B	0	10	1	109	1
PIK3C2G	0	10	5	105	1
PIK3C3	0	10	3	107	1
PIK3CB	0	10	2	108	1
PIK3CG	0	10	5	105	1
PIK3R1	0	10	1	109	1
PIK3R2	0	10	1	109	1
PKD1L1	0	10	4	106	1
PKHD1	0	10	4	106	1
PKHD1L1	1	9	11	99	1
PKP4	0	10	2	108	1
PLAG1	0	10	1	109	1
PLCB1	0	10	4	106	1
PLEC	0	10	3	107	1
PLIN5	0	10	1	109	1
PLXNA1	0	10	1	109	1
PMS1	0	10	3	107	1
PMS2	0	10	1	109	1
POLQ	0	10	5	105	1
PPP1R9A	0	10	1	109	1
PPP4R4	0	10	2	108	1
PRDM11	0	10	1	109	1
PRDM7	0	10	1	109	1
PRDM9	0	10	2	108	1
PRKCA	0	10	2	108	1
PROKR2	0	10	1	109	1
PRR21	0	10	1	109	1
PTEN	0	10	1	109	1
PTK6	0	10	0	110	1
PTPRF	0	10	3	107	1
PZP	0	10	2	108	1
RAD51L1	0	10	1	109	1
RANBP17	0	10	1	109	1
RARG	0	10	1	109	1
RASA1	0	10	3	107	1
RB1CC1	0	10	7	103	1
RBM15	0	10	1	109	1
RECQL4	0	10	1	109	1
REST	0	10	3	107	1
RGAG1	0	10	3	107	1
RIMBP2	0	10	1	109	1
RIMS2	0	10	2	108	1
ROS1	0	10	4	106	1
RUFY1	0	10	1	109	1
RUNX1	0	10	1	109	1
RXFP3	0	10	2	108	1
SALL1	0	10	1	109	1
SBDS	0	10	1	109	1
SETBP1	0	10	2	108	1
SETD2	0	10	1	109	1
SFMBT2	0	10	1	109	1
SI	0	10	10	100	1
SLC26A3	0	10	3	107	1
SLC2A13	0	10	2	108	1
SMAD1	0	10	1	109	1
SMAD4	0	10	1	109	1
SMC6	0	10	1	109	1
SMO	0	10	1	109	1
SPTA1	0	10	8	102	1
SPTBN4	0	10	1	109	1
SPTLC2	0	10	1	109	1
SRGAP3	0	10	1	109	1
SRPK2	0	10	2	108	1
STAT1	0	10	3	107	1
STAT3	0	10	1	109	1
STYK1	0	10	1	109	1
SYNE1	1	9	20	90	1
SYNE2	0	10	10	100	1
TAP2	0	10	2	108	1
TDRD3	0	10	1	109	1
TET2	0	10	3	107	1
TEX15	0	10	2	108	1
TFRC	0	10	3	107	1
TGFBR2	0	10	3	107	1
TNFAIP3	0	10	1	109	1
TP53	5	5	51	59	1
TP63	0	10	3	107	1
TPM3	0	10	1	109	1
TPP2	0	10	3	107	1
TPRX1	0	10	6	104	1
TRAF3	0	10	2	108	1
TRIO	0	10	2	108	1
TRIP11	0	10	1	109	1
TRRAP	0	10	3	107	1
TSC1	0	10	3	107	1
TSC2	0	10	1	109	1
UBE3A	0	10	1	109	1
UBE4A	0	10	1	109	1
UBR5	0	10	8	102	1
UNC5D	0	10	4	106	1
USH2A	1	9	12	98	1
USP26	0	10	2	108	1
USP6	0	10	1	109	1
VPS41	0	10	2	108	1
WBSCR17	0	10	2	108	1
WDR63	0	10	2	108	1
WHSC1	0	10	1	109	1
WHSC1L1	0	10	1	109	1
WT1	0	10	1	109	1
XPC	0	10	1	109	1
XRCC6	0	10	2	108	1
ZEB2	0	10	2	108	1
ZFHX4	1	9	15	95	1
ZNF180	0	10	1	109	1
ZNF19	0	10	1	109	1
ZNF217	0	10	1	109	1
ZNF426	0	10	1	109	1
ZNF433	0	10	1	109	1
ZNF439	0	10	1	109	1
ZNF440	0	10	1	109	1
ZNF443	0	10	1	109	1
ZNF461	0	10	1	109	1
ZNF501	0	10	1	109	1
ZNF521	0	10	6	104	1
ZNF665	0	10	1	109	1
ZNF699	0	10	1	109	1
ZNF761	0	10	1	109	1
ZNF790	0	10	2	108	1
ZNF799	0	10	2	108	1
ZNF823	0	10	1	109	1
ZNF83	0	10	1	109	1
Supplementary Table S2(E).2 Mutation event difference between node(+) and node(-) in all oropharynx tumor samples
Gene Name	Mutation Event in node(-)	No Mutation Event in node(-)	Mutation Event in node(+)	No Mutation Event in node(+)	P Value
INCENP	1	1	0	65	0.0298507
KDM5A	1	1	0	65	0.0298507
SLITRK3	1	1	0	65	0.0298507
PIK3CA	2	0	12	53	0.0411578
DSPP	1	1	1	64	0.0592492
RIPK4	1	1	1	64	0.0592492
CNTN6	1	1	2	63	0.0881954
GPC5	1	1	2	63	0.0881954
RB1	1	1	2	63	0.0881954
SPAG17	1	1	2	63	0.0881954
THSD7A	1	1	2	63	0.0881954
TTN	2	0	21	44	0.114428
KRAS	1	1	3	62	0.116689
PCDH15	1	1	3	62	0.116689
COL11A1	1	1	4	61	0.144731
FGFR3	1	1	5	60	0.17232
ZFHX4	1	1	6	59	0.199457
FAT1	1	1	7	58	0.226142
FLG	1	1	8	57	0.252374
CSMD3	0	2	12	53	1
MLL2	0	2	10	55	1
SYNE2	0	2	6	59	1
ABAT	0	2	2	63	1
ABCA12	0	2	0	65	1
ABCA4	0	2	0	65	1
ABCA6	0	2	0	65	1
ABCD2	0	2	4	61	1
ADAMTS12	0	2	4	61	1
ADCY1	0	2	0	65	1
AHNAK	0	2	4	61	1
AIM1	0	2	0	65	1
AKAP1	0	2	0	65	1
AKT1	0	2	0	65	1
AKT3	0	2	0	65	1
AMD1	0	2	0	65	1
ANKHD1-EIF4EBP3	0	2	0	65	1
APC	0	2	0	65	1
APOB	0	2	2	63	1
ARFGEF2	0	2	0	65	1
ASH1L	0	2	5	60	1
ASXL1	0	2	2	63	1
ATM	0	2	0	65	1
BBS9	0	2	0	65	1
BBX	0	2	3	62	1
BRCA1	0	2	0	65	1
BRCA2	0	2	4	61	1
BRD4	0	2	0	65	1
BRIP1	0	2	2	63	1
BTBD12	0	2	2	63	1
BZRAP1	0	2	0	65	1
CCNA1	0	2	0	65	1
CCR2	0	2	0	65	1
CD248	0	2	0	65	1
CDH12	0	2	3	62	1
CDH9	0	2	4	61	1
CDKN2A	0	2	4	61	1
CELSR3	0	2	0	65	1
CNGA3	0	2	0	65	1
COL22A1	0	2	0	65	1
COL6A3	0	2	2	63	1
CRIPAK	0	2	2	63	1
CTNNB1	0	2	0	65	1
CTNND2	0	2	3	62	1
CUBN	0	2	4	61	1
CYLD	0	2	3	62	1
DCC	0	2	0	65	1
DDR2	0	2	2	63	1
DDX3X	0	2	3	62	1
DGKG	0	2	0	65	1
DICER1	0	2	2	63	1
DNAH3	0	2	4	61	1
DNAH5	0	2	3	62	1
DPYS	0	2	0	65	1
DSCAM	0	2	2	63	1
DSEL	0	2	2	63	1
DYRK1B	0	2	0	65	1
E2F3	0	2	0	65	1
EFCAB6	0	2	2	63	1
ENPP2	0	2	0	65	1
EP300	0	2	5	60	1
EPHA2	0	2	2	63	1
EPHA3	0	2	0	65	1
EPHA7	0	2	3	62	1
EPS8	0	2	0	65	1
ETV5	0	2	0	65	1
EZH2	0	2	2	63	1
FAM5B	0	2	0	65	1
FANCD2	0	2	2	63	1
FANCM	0	2	0	65	1
FAT2	0	2	3	62	1
FBXW7	0	2	3	62	1
FGFR1	0	2	0	65	1
FGFR2	0	2	2	63	1
FOXP1	0	2	0	65	1
GABRB3	0	2	0	65	1
GAS7	0	2	2	63	1
GC	0	2	0	65	1
GNAQ	0	2	0	65	1
GRM8	0	2	2	63	1
HBS1L	0	2	0	65	1
HDX	0	2	0	65	1
HERC2	0	2	0	65	1
HLA-B	0	2	0	65	1
HRAS	0	2	2	63	1
HUWE1	0	2	7	58	1
HYDIN	0	2	2	63	1
IL6ST	0	2	0	65	1
INPP4A	0	2	3	62	1
INTS3	0	2	0	65	1
ITK	0	2	0	65	1
JAK1	0	2	0	65	1
KDR	0	2	0	65	1
KEAP1	0	2	0	65	1
KIT	0	2	0	65	1
KRT10	0	2	0	65	1
LRFN5	0	2	2	63	1
LRP1B	0	2	4	61	1
LRRK2	0	2	0	65	1
LRRTM3	0	2	0	65	1
LTBP1	0	2	0	65	1
MACF1	0	2	2	63	1
MAML3	0	2	3	62	1
MAP3K1	0	2	0	65	1
MECOM	0	2	0	65	1
MLF1	0	2	0	65	1
MLL3	0	2	3	62	1
MST1R	0	2	0	65	1
MTOR	0	2	4	61	1
MUC2	0	2	3	62	1
MUC21	0	2	0	65	1
MYH11	0	2	0	65	1
MYH2	0	2	2	63	1
MYH8	0	2	4	61	1
NACA2	0	2	0	65	1
NCOA3	0	2	0	65	1
NELL2	0	2	0	65	1
NF1	0	2	3	62	1
NF2	0	2	0	65	1
NFATC3	0	2	0	65	1
NFE2L2	0	2	3	62	1
NKAPL	0	2	2	63	1
NLRP11	0	2	2	63	1
NLRP12	0	2	0	65	1
NLRP4	0	2	0	65	1
NOTCH1	0	2	8	57	1
NOTCH3	0	2	2	63	1
NRAP	0	2	0	65	1
NRG2	0	2	2	63	1
NRK	0	2	2	63	1
NTRK3	0	2	0	65	1
NUP214	0	2	2	63	1
OR4C15	0	2	0	65	1
OR51S1	0	2	0	65	1
OR5L2	0	2	0	65	1
OR8H2	0	2	0	65	1
OR8K1	0	2	0	65	1
PAK7	0	2	4	61	1
PBRM1	0	2	2	63	1
PCDHA2	0	2	0	65	1
PCDHA6	0	2	0	65	1
PCDHA8	0	2	2	63	1
PCDHAC2	0	2	0	65	1
PCDHB12	0	2	0	65	1
PCLO	0	2	4	61	1
PDE3A	0	2	2	63	1
PDE4DIP	0	2	4	61	1
PEG3	0	2	3	62	1
PHKB	0	2	0	65	1
PHLPP1	0	2	3	62	1
PHLPP2	0	2	0	65	1
PIK3C2B	0	2	0	65	1
PIK3C3	0	2	2	63	1
PIK3R1	0	2	0	65	1
PKD1L1	0	2	3	62	1
PKHD1	0	2	2	63	1
PKHD1L1	0	2	3	62	1
PLAG1	0	2	0	65	1
PLCB1	0	2	3	62	1
PLEC	0	2	2	63	1
PLXNA1	0	2	0	65	1
PMS1	0	2	2	63	1
POLQ	0	2	3	62	1
PRDM11	0	2	0	65	1
PRDM7	0	2	0	65	1
PRDM9	0	2	0	65	1
PRKCA	0	2	2	63	1
PROKR2	0	2	0	65	1
PTEN	0	2	0	65	1
PTK6	0	2	0	65	1
PTPRF	0	2	2	63	1
PZP	0	2	0	65	1
RANBP17	0	2	0	65	1
RB1CC1	0	2	3	62	1
RELN	0	2	0	65	1
REST	0	2	3	62	1
RGAG1	0	2	2	63	1
RIMBP2	0	2	0	65	1
RXFP3	0	2	2	63	1
SALL1	0	2	0	65	1
SETBP1	0	2	0	65	1
SFMBT2	0	2	0	65	1
SI	0	2	5	60	1
SLC26A3	0	2	2	63	1
SLC2A13	0	2	0	65	1
SLCO5A1	0	2	0	65	1
SMAD4	0	2	0	65	1
SMARCA4	0	2	0	65	1
SMC6	0	2	0	65	1
SMO	0	2	0	65	1
SPTA1	0	2	3	62	1
SPTLC2	0	2	0	65	1
STAT1	0	2	3	62	1
STAT3	0	2	0	65	1
STYK1	0	2	0	65	1
SYNE1	0	2	8	57	1
TAP2	0	2	2	63	1
TEX15	0	2	2	63	1
TFRC	0	2	3	62	1
TGFBR2	0	2	2	63	1
TP53	0	2	16	49	1
TP63	0	2	2	63	1
TPM3	0	2	0	65	1
TPP2	0	2	2	63	1
TPRX1	0	2	4	61	1
TRRAP	0	2	3	62	1
TSC1	0	2	2	63	1
UBE3A	0	2	0	65	1
UBE4A	0	2	0	65	1
UBR5	0	2	8	57	1
USH2A	0	2	5	60	1
VWA5A	0	2	0	65	1
WDR63	0	2	0	65	1
WHSC1	0	2	0	65	1
WHSC1L1	0	2	0	65	1
XPC	0	2	0	65	1
ZEB2	0	2	0	65	1
ZNF180	0	2	0	65	1
ZNF19	0	2	0	65	1
ZNF433	0	2	0	65	1
ZNF440	0	2	0	65	1
ZNF443	0	2	0	65	1
ZNF521	0	2	4	61	1
ZNF534	0	2	0	65	1
ZNF571	0	2	0	65	1
ZNF761	0	2	0	65	1
ZNF804B	0	2	3	62	1
ZNF823	0	2	0	65	1
ABCA9	0	2	1	64	1
ABHD13	0	2	1	64	1
ABL2	0	2	1	64	1
ACACB	0	2	1	64	1
ADAMTSL1	0	2	1	64	1
ANKRD17	0	2	1	64	1
ANO4	0	2	1	64	1
ARHGAP30	0	2	1	64	1
ARID1A	0	2	1	64	1
ATXN1	0	2	1	64	1
B2M	0	2	1	64	1
BAGE2	0	2	1	64	1
BAZ1B	0	2	1	64	1
BCL9	0	2	1	64	1
BIRC3	0	2	1	64	1
BLM	0	2	1	64	1
C1orf173	0	2	1	64	1
CABIN1	0	2	1	64	1
CARD11	0	2	1	64	1
CASP8	0	2	1	64	1
CBL	0	2	1	64	1
CCR5	0	2	1	64	1
CD8A	0	2	1	64	1
CDH1	0	2	1	64	1
CDH10	0	2	1	64	1
CDH11	0	2	1	64	1
CHD5	0	2	1	64	1
CLCN4	0	2	1	64	1
CLSTN2	0	2	1	64	1
CNTNAP2	0	2	1	64	1
COQ3	0	2	1	64	1
CREBBP	0	2	1	64	1
CUL3	0	2	1	64	1
CYP26A1	0	2	1	64	1
DCT	0	2	1	64	1
DOK6	0	2	1	64	1
DST	0	2	1	64	1
DUSP5	0	2	1	64	1
E2F7	0	2	1	64	1
EBF1	0	2	1	64	1
EGFR	0	2	1	64	1
EP400	0	2	1	64	1
EPHA1	0	2	1	64	1
EPHB1	0	2	1	64	1
EPHB3	0	2	1	64	1
EPM2AIP1	0	2	1	64	1
ERAS	0	2	1	64	1
ERBB3	0	2	1	64	1
ERBB4	0	2	1	64	1
ETV6	0	2	1	64	1
EWSR1	0	2	1	64	1
FAM135B	0	2	1	64	1
FAM179B	0	2	1	64	1
FANCA	0	2	1	64	1
FANCG	0	2	1	64	1
FARP2	0	2	1	64	1
FAT4	0	2	1	64	1
FGFR4	0	2	1	64	1
FLG2	0	2	1	64	1
FLT3	0	2	1	64	1
FSTL5	0	2	1	64	1
GMPS	0	2	1	64	1
GPR174	0	2	1	64	1
HLA-A	0	2	1	64	1
HSCB	0	2	1	64	1
INO80	0	2	1	64	1
INPP4B	0	2	1	64	1
INPP5D	0	2	1	64	1
IRF6	0	2	1	64	1
JAK2	0	2	1	64	1
KCTD8	0	2	1	64	1
KIAA1468	0	2	1	64	1
KIAA1549	0	2	1	64	1
KIAA2022	0	2	1	64	1
KRTAP4-3	0	2	1	64	1
KRTAP6-3	0	2	1	64	1
LAMB1	0	2	1	64	1
LILRA3	0	2	1	64	1
LILRA5	0	2	1	64	1
LILRB1	0	2	1	64	1
LILRB2	0	2	1	64	1
LOC200030	0	2	1	64	1
LOC642587	0	2	1	64	1
LRRC37B	0	2	1	64	1
LRRTM1	0	2	1	64	1
MAP2	0	2	1	64	1
MCOLN2	0	2	1	64	1
MDM2	0	2	1	64	1
MED1	0	2	1	64	1
MEF2C	0	2	1	64	1
MKL1	0	2	1	64	1
MLLT10	0	2	1	64	1
MMP16	0	2	1	64	1
MTA2	0	2	1	64	1
MX2	0	2	1	64	1
MYC	0	2	1	64	1
MYH1	0	2	1	64	1
MYH13	0	2	1	64	1
MYH4	0	2	1	64	1
MYH6	0	2	1	64	1
MYH7	0	2	1	64	1
MYH7B	0	2	1	64	1
MYH9	0	2	1	64	1
NAV3	0	2	1	64	1
NBPF1	0	2	1	64	1
NBPF3	0	2	1	64	1
NCOR1	0	2	1	64	1
NECAB1	0	2	1	64	1
NKAP	0	2	1	64	1
NONO	0	2	1	64	1
NOTCH2	0	2	1	64	1
NRAS	0	2	1	64	1
NRXN3	0	2	1	64	1
NSD1	0	2	1	64	1
NUMA1	0	2	1	64	1
ODZ1	0	2	1	64	1
OR8H1	0	2	1	64	1
PALB2	0	2	1	64	1
PARK2	0	2	1	64	1
PCDH17	0	2	1	64	1
PCDHA1	0	2	1	64	1
PCDHA12	0	2	1	64	1
PCDHA13	0	2	1	64	1
PCDHB11	0	2	1	64	1
PCDHB4	0	2	1	64	1
PCM1	0	2	1	64	1
PDGFRA	0	2	1	64	1
PHIP	0	2	1	64	1
PHKA2	0	2	1	64	1
PIK3C2A	0	2	1	64	1
PIK3C2G	0	2	1	64	1
PIK3CB	0	2	1	64	1
PIK3CG	0	2	1	64	1
PIK3R2	0	2	1	64	1
PKP4	0	2	1	64	1
PLIN5	0	2	1	64	1
PMS2	0	2	1	64	1
PPP1R9A	0	2	1	64	1
PPP4R4	0	2	1	64	1
PRR21	0	2	1	64	1
RAD51L1	0	2	1	64	1
RARG	0	2	1	64	1
RASA1	0	2	1	64	1
RBM15	0	2	1	64	1
RECQL4	0	2	1	64	1
RIMS2	0	2	1	64	1
ROS1	0	2	1	64	1
RUFY1	0	2	1	64	1
RUNX1	0	2	1	64	1
SBDS	0	2	1	64	1
SETD2	0	2	1	64	1
SFRS14	0	2	1	64	1
SMAD1	0	2	1	64	1
SPTBN4	0	2	1	64	1
SRGAP3	0	2	1	64	1
SRPK2	0	2	1	64	1
TDRD3	0	2	1	64	1
TET2	0	2	1	64	1
TMEM132D	0	2	1	64	1
TNFAIP3	0	2	1	64	1
TRAF3	0	2	1	64	1
TRIO	0	2	1	64	1
TRIP11	0	2	1	64	1
TSC2	0	2	1	64	1
UNC5D	0	2	1	64	1
USP26	0	2	1	64	1
USP6	0	2	1	64	1
VPS41	0	2	1	64	1
WBSCR17	0	2	1	64	1
WRN	0	2	1	64	1
WT1	0	2	1	64	1
XRCC6	0	2	1	64	1
YTHDC1	0	2	1	64	1
ZNF217	0	2	1	64	1
ZNF426	0	2	1	64	1
ZNF439	0	2	1	64	1
ZNF461	0	2	1	64	1
ZNF501	0	2	1	64	1
ZNF665	0	2	1	64	1
ZNF699	0	2	1	64	1
ZNF790	0	2	1	64	1
ZNF799	0	2	1	64	1
ZNF83	0	2	1	64	1
Supplementary Table S2(E).3 Mutation event difference between node(+) and node(-) in HPV+ tumor samples
Gene Name	Mutation Event in node(-)	No Mutation Event in node(-)	Mutation Event in node(+)	No Mutation Event in node(+)	P Value
DSPP	1	1	0	49	0.0392157
INCENP	1	1	0	49	0.0392157
KDM5A	1	1	0	49	0.0392157
SLITRK3	1	1	0	49	0.0392157
PIK3CA	2	0	9	40	0.0431373
GPC5	1	1	1	48	0.0776471
PCDH15	1	1	1	48	0.0776471
RIPK4	1	1	1	48	0.0776471
SPAG17	1	1	1	48	0.0776471
THSD7A	1	1	1	48	0.0776471
TTN	2	0	13	36	0.0823529
CNTN6	1	1	2	47	0.115294
KRAS	1	1	2	47	0.115294
RB1	1	1	2	47	0.115294
COL11A1	1	1	3	46	0.152157
FLG	1	1	5	44	0.223529
ZFHX4	1	1	5	44	0.223529
FAT1	1	1	6	43	0.258039
FGFR3	1	1	6	43	0.258039
ABAT	0	2	1	48	1
ABCD2	0	2	3	46	1
ABHD13	0	2	1	48	1
ABL2	0	2	1	48	1
ACACB	0	2	1	48	1
ADAMTSL1	0	2	1	48	1
AHNAK	0	2	3	46	1
APC	0	2	1	48	1
ARFGEF2	0	2	1	48	1
ARHGAP30	0	2	1	48	1
ARID1A	0	2	1	48	1
ASH1L	0	2	4	45	1
B2M	0	2	1	48	1
BAGE2	0	2	1	48	1
BBS9	0	2	1	48	1
BBX	0	2	3	46	1
BCL9	0	2	1	48	1
BIRC3	0	2	1	48	1
BLM	0	2	1	48	1
BRCA1	0	2	1	48	1
BRCA2	0	2	3	46	1
BRIP1	0	2	1	48	1
BTBD12	0	2	1	48	1
C1orf173	0	2	1	48	1
CABIN1	0	2	1	48	1
CASP8	0	2	1	48	1
CD8A	0	2	1	48	1
CDH1	0	2	1	48	1
CDH11	0	2	1	48	1
CDH12	0	2	4	45	1
CDH9	0	2	1	48	1
CELSR3	0	2	1	48	1
CHD5	0	2	1	48	1
CLCN4	0	2	1	48	1
CLSTN2	0	2	1	48	1
CNTNAP2	0	2	1	48	1
COL6A3	0	2	3	46	1
COQ3	0	2	1	48	1
CTNND2	0	2	3	46	1
CUBN	0	2	3	46	1
CYLD	0	2	3	46	1
CYP26A1	0	2	1	48	1
DCT	0	2	1	48	1
DDR2	0	2	1	48	1
DDX3X	0	2	4	45	1
DNAH3	0	2	4	45	1
DNAH5	0	2	4	45	1
DSEL	0	2	3	46	1
DST	0	2	1	48	1
DUSP5	0	2	1	48	1
EBF1	0	2	1	48	1
EFCAB6	0	2	1	48	1
EP300	0	2	4	45	1
EP400	0	2	1	48	1
EPHA7	0	2	3	46	1
EPHB1	0	2	1	48	1
EPHB3	0	2	1	48	1
ERAS	0	2	1	48	1
ERBB3	0	2	1	48	1
ERBB4	0	2	1	48	1
ETV6	0	2	1	48	1
EWSR1	0	2	1	48	1
EZH2	0	2	3	46	1
FAM179B	0	2	1	48	1
FAM5B	0	2	1	48	1
FANCA	0	2	1	48	1
FANCG	0	2	1	48	1
FARP2	0	2	1	48	1
FGFR4	0	2	1	48	1
FLT3	0	2	1	48	1
FSTL5	0	2	1	48	1
GPR174	0	2	1	48	1
HLA-A	0	2	1	48	1
HLA-B	0	2	1	48	1
HSCB	0	2	1	48	1
HYDIN	0	2	1	48	1
INO80	0	2	1	48	1
INPP4B	0	2	1	48	1
INPP5D	0	2	1	48	1
IRF6	0	2	1	48	1
ITK	0	2	1	48	1
JAK1	0	2	1	48	1
JAK2	0	2	1	48	1
KCTD8	0	2	1	48	1
KDR	0	2	1	48	1
KIAA1468	0	2	1	48	1
KIAA2022	0	2	1	48	1
KRT10	0	2	1	48	1
KRTAP4-3	0	2	1	48	1
LAMB1	0	2	1	48	1
LILRA3	0	2	1	48	1
LILRA5	0	2	1	48	1
LOC200030	0	2	1	48	1
LOC642587	0	2	1	48	1
LRRC37B	0	2	1	48	1
MACF1	0	2	1	48	1
MAP2	0	2	1	48	1
MCOLN2	0	2	1	48	1
MDM2	0	2	1	48	1
MED1	0	2	1	48	1
MKL1	0	2	1	48	1
MLF1	0	2	1	48	1
MLL3	0	2	4	45	1
MLLT10	0	2	1	48	1
MMP16	0	2	1	48	1
MTOR	0	2	4	45	1
MUC2	0	2	3	46	1
MX2	0	2	1	48	1
MYC	0	2	1	48	1
MYH1	0	2	1	48	1
MYH11	0	2	1	48	1
MYH13	0	2	1	48	1
MYH2	0	2	1	48	1
MYH6	0	2	1	48	1
MYH7	0	2	1	48	1
MYH7B	0	2	1	48	1
MYH9	0	2	1	48	1
NAV3	0	2	1	48	1
NBPF3	0	2	1	48	1
NCOR1	0	2	1	48	1
NELL2	0	2	1	48	1
NF1	0	2	3	46	1
NKAP	0	2	1	48	1
NONO	0	2	1	48	1
NOTCH1	0	2	4	45	1
NRAP	0	2	1	48	1
NRXN3	0	2	1	48	1
NSD1	0	2	1	48	1
ODZ1	0	2	1	48	1
OR8K1	0	2	1	48	1
PALB2	0	2	1	48	1
PARK2	0	2	1	48	1
PCDH17	0	2	1	48	1
PCDHA1	0	2	1	48	1
PCDHA12	0	2	1	48	1
PCDHA13	0	2	1	48	1
PCDHA8	0	2	1	48	1
PCDHB11	0	2	1	48	1
PCLO	0	2	4	45	1
PDE3A	0	2	1	48	1
PHIP	0	2	1	48	1
PHLPP2	0	2	1	48	1
PIK3C2A	0	2	1	48	1
PIK3C3	0	2	3	46	1
PIK3CB	0	2	1	48	1
PIK3R1	0	2	1	48	1
PIK3R2	0	2	1	48	1
PKD1L1	0	2	3	46	1
PKP4	0	2	1	48	1
PLAG1	0	2	1	48	1
PLEC	0	2	1	48	1
PMS1	0	2	1	48	1
PMS2	0	2	1	48	1
POLQ	0	2	3	46	1
PPP1R9A	0	2	1	48	1
PPP4R4	0	2	1	48	1
PRDM7	0	2	1	48	1
PRR21	0	2	1	48	1
PTPRF	0	2	1	48	1
RAD51L1	0	2	1	48	1
RASA1	0	2	1	48	1
RECQL4	0	2	1	48	1
RELN	0	2	1	48	1
REST	0	2	3	46	1
RGAG1	0	2	1	48	1
RIMS2	0	2	1	48	1
ROS1	0	2	1	48	1
RUFY1	0	2	1	48	1
RUNX1	0	2	1	48	1
RXFP3	0	2	1	48	1
SBDS	0	2	1	48	1
SI	0	2	3	46	1
SLC2A13	0	2	1	48	1
SMAD1	0	2	1	48	1
SMO	0	2	1	48	1
SPTA1	0	2	1	48	1
SPTBN4	0	2	1	48	1
SPTLC2	0	2	1	48	1
SRGAP3	0	2	1	48	1
SRPK2	0	2	1	48	1
STAT1	0	2	3	46	1
SYNE2	0	2	4	45	1
TAP2	0	2	1	48	1
TET2	0	2	1	48	1
TFRC	0	2	3	46	1
TMEM132D	0	2	1	48	1
TNFAIP3	0	2	1	48	1
TPRX1	0	2	3	46	1
TRIP11	0	2	1	48	1
TRRAP	0	2	3	46	1
TSC1	0	2	1	48	1
TSC2	0	2	1	48	1
UBE3A	0	2	1	48	1
UBE4A	0	2	1	48	1
UNC5D	0	2	1	48	1
USH2A	0	2	3	46	1
USP26	0	2	1	48	1
USP6	0	2	1	48	1
VPS41	0	2	1	48	1
WT1	0	2	1	48	1
XRCC6	0	2	1	48	1
ZEB2	0	2	1	48	1
ZNF217	0	2	1	48	1
ZNF426	0	2	1	48	1
ZNF461	0	2	1	48	1
ZNF501	0	2	1	48	1
ZNF665	0	2	1	48	1
ZNF790	0	2	1	48	1
ZNF799	0	2	1	48	1
ZNF83	0	2	1	48	1
ABCA12	0	2	0	49	1
ABCA4	0	2	0	49	1
ABCA6	0	2	0	49	1
ABCA9	0	2	0	49	1
ADAMTS12	0	2	5	44	1
ADCY1	0	2	0	49	1
AIM1	0	2	0	49	1
AKAP1	0	2	0	49	1
AKT1	0	2	0	49	1
AKT3	0	2	0	49	1
AMD1	0	2	0	49	1
ANKHD1-EIF4EBP3	0	2	0	49	1
ANKRD17	0	2	0	49	1
ANO4	0	2	0	49	1
APOB	0	2	2	47	1
ASXL1	0	2	2	47	1
ATM	0	2	0	49	1
ATXN1	0	2	0	49	1
BAZ1B	0	2	0	49	1
BRD4	0	2	0	49	1
BZRAP1	0	2	0	49	1
CARD11	0	2	0	49	1
CBL	0	2	0	49	1
CCNA1	0	2	0	49	1
CCR2	0	2	0	49	1
CCR5	0	2	0	49	1
CD248	0	2	0	49	1
CDH10	0	2	2	47	1
CDKN2A	0	2	0	49	1
CNGA3	0	2	0	49	1
COL22A1	0	2	0	49	1
CREBBP	0	2	2	47	1
CRIPAK	0	2	2	47	1
CSMD3	0	2	5	44	1
CTNNB1	0	2	0	49	1
CUL3	0	2	0	49	1
DCC	0	2	0	49	1
DGKG	0	2	0	49	1
DICER1	0	2	0	49	1
DOK6	0	2	0	49	1
DPYS	0	2	0	49	1
DSCAM	0	2	2	47	1
DYRK1B	0	2	0	49	1
E2F3	0	2	0	49	1
E2F7	0	2	2	47	1
EGFR	0	2	0	49	1
ENPP2	0	2	0	49	1
EPHA1	0	2	0	49	1
EPHA2	0	2	2	47	1
EPHA3	0	2	0	49	1
EPM2AIP1	0	2	0	49	1
EPS8	0	2	0	49	1
ETV5	0	2	0	49	1
FAM135B	0	2	0	49	1
FANCD2	0	2	2	47	1
FANCM	0	2	0	49	1
FAT2	0	2	2	47	1
FAT4	0	2	2	47	1
FBXW7	0	2	2	47	1
FGFR1	0	2	0	49	1
FGFR2	0	2	2	47	1
FLG2	0	2	2	47	1
FOXP1	0	2	0	49	1
GABRB3	0	2	0	49	1
GAS7	0	2	2	47	1
GC	0	2	0	49	1
GMPS	0	2	0	49	1
GNAQ	0	2	0	49	1
GRM8	0	2	2	47	1
HBS1L	0	2	0	49	1
HDX	0	2	0	49	1
HERC2	0	2	0	49	1
HRAS	0	2	2	47	1
HUWE1	0	2	5	44	1
IL6ST	0	2	0	49	1
INPP4A	0	2	2	47	1
INTS3	0	2	0	49	1
KEAP1	0	2	0	49	1
KIAA1549	0	2	2	47	1
KIT	0	2	0	49	1
KRTAP6-3	0	2	0	49	1
LILRB1	0	2	0	49	1
LILRB2	0	2	0	49	1
LRFN5	0	2	2	47	1
LRP1B	0	2	2	47	1
LRRK2	0	2	0	49	1
LRRTM1	0	2	0	49	1
LRRTM3	0	2	0	49	1
LTBP1	0	2	0	49	1
MAML3	0	2	2	47	1
MAP3K1	0	2	0	49	1
MECOM	0	2	0	49	1
MEF2C	0	2	0	49	1
MLL2	0	2	5	44	1
MST1R	0	2	0	49	1
MTA2	0	2	0	49	1
MUC21	0	2	0	49	1
MYH4	0	2	2	47	1
MYH8	0	2	2	47	1
NACA2	0	2	0	49	1
NBPF1	0	2	0	49	1
NCOA3	0	2	0	49	1
NECAB1	0	2	0	49	1
NF2	0	2	0	49	1
NFATC3	0	2	0	49	1
NFE2L2	0	2	2	47	1
NKAPL	0	2	2	47	1
NLRP11	0	2	2	47	1
NLRP12	0	2	0	49	1
NLRP4	0	2	0	49	1
NOTCH2	0	2	0	49	1
NOTCH3	0	2	0	49	1
NRAS	0	2	0	49	1
NRG2	0	2	2	47	1
NRK	0	2	2	47	1
NTRK3	0	2	0	49	1
NUMA1	0	2	0	49	1
NUP214	0	2	2	47	1
OR4C15	0	2	0	49	1
OR51S1	0	2	0	49	1
OR5L2	0	2	0	49	1
OR8H1	0	2	0	49	1
OR8H2	0	2	0	49	1
PAK7	0	2	2	47	1
PBRM1	0	2	2	47	1
PCDHA2	0	2	0	49	1
PCDHA6	0	2	0	49	1
PCDHAC2	0	2	0	49	1
PCDHB12	0	2	0	49	1
PCDHB4	0	2	0	49	1
PCM1	0	2	0	49	1
PDE4DIP	0	2	2	47	1
PDGFRA	0	2	0	49	1
PEG3	0	2	5	44	1
PHKA2	0	2	0	49	1
PHKB	0	2	0	49	1
PHLPP1	0	2	2	47	1
PIK3C2B	0	2	0	49	1
PIK3C2G	0	2	0	49	1
PIK3CG	0	2	0	49	1
PKHD1	0	2	2	47	1
PKHD1L1	0	2	2	47	1
PLCB1	0	2	2	47	1
PLIN5	0	2	0	49	1
PLXNA1	0	2	0	49	1
PRDM11	0	2	0	49	1
PRDM9	0	2	0	49	1
PRKCA	0	2	2	47	1
PROKR2	0	2	0	49	1
PTEN	0	2	0	49	1
PTK6	0	2	0	49	1
PZP	0	2	0	49	1
RANBP17	0	2	0	49	1
RARG	0	2	0	49	1
RB1CC1	0	2	2	47	1
RBM15	0	2	0	49	1
RIMBP2	0	2	0	49	1
SALL1	0	2	0	49	1
SETBP1	0	2	0	49	1
SETD2	0	2	0	49	1
SFMBT2	0	2	0	49	1
SFRS14	0	2	0	49	1
SLC26A3	0	2	2	47	1
SLCO5A1	0	2	0	49	1
SMAD4	0	2	0	49	1
SMARCA4	0	2	0	49	1
SMC6	0	2	0	49	1
STAT3	0	2	0	49	1
STYK1	0	2	0	49	1
SYNE1	0	2	6	43	1
TDRD3	0	2	0	49	1
TEX15	0	2	2	47	1
TGFBR2	0	2	2	47	1
TP53	0	2	2	47	1
TP63	0	2	2	47	1
TPM3	0	2	0	49	1
TPP2	0	2	2	47	1
TRAF3	0	2	2	47	1
TRIO	0	2	0	49	1
UBR5	0	2	2	47	1
VWA5A	0	2	0	49	1
WBSCR17	0	2	0	49	1
WDR63	0	2	0	49	1
WHSC1	0	2	0	49	1
WHSC1L1	0	2	0	49	1
WRN	0	2	0	49	1
XPC	0	2	0	49	1
YTHDC1	0	2	0	49	1
ZNF180	0	2	0	49	1
ZNF19	0	2	0	49	1
ZNF433	0	2	0	49	1
ZNF439	0	2	0	49	1
ZNF440	0	2	0	49	1
ZNF443	0	2	0	49	1
ZNF521	0	2	2	47	1
ZNF534	0	2	0	49	1
ZNF571	0	2	0	49	1
ZNF699	0	2	0	49	1
ZNF761	0	2	0	49	1
ZNF804B	0	2	2	47	1
ZNF823	0	2	0	49	1
Supplementary Table S2(E).4 Mutation event difference between node(+) and node(-) in HPV- tumor samples
Gene Name	Mutation Event in node(-)	No Mutation Event in node(-)	Mutation Event in node(+)	No Mutation Event in node(+)	P Value
AHNAK	2	6	3	58	0.0991702
AKAP1	1	7	0	61	0.115942
APC	1	7	0	61	0.115942
COL6A3	1	7	0	61	0.115942
LRRTM3	1	7	0	61	0.115942
MAP3K1	1	7	0	61	0.115942
MST1R	1	7	0	61	0.115942
NCOA3	1	7	0	61	0.115942
NF2	1	7	0	61	0.115942
NKAPL	1	7	0	61	0.115942
OR5L2	1	7	0	61	0.115942
PHKB	1	7	0	61	0.115942
SMARCA4	1	7	0	61	0.115942
ZNF534	1	7	0	61	0.115942
ZNF571	1	7	0	61	0.115942
ABCA6	1	7	1	60	0.219949
CASP8	1	7	1	60	0.219949
EP300	1	7	1	60	0.219949
HRAS	1	7	1	60	0.219949
MAML3	1	7	1	60	0.219949
NBPF1	1	7	1	60	0.219949
SFRS14	1	7	1	60	0.219949
SLCO5A1	1	7	1	60	0.219949
VWA5A	1	7	1	60	0.219949
WRN	1	7	1	60	0.219949
YTHDC1	1	7	1	60	0.219949
FAT1	2	6	6	55	0.230398
CDH12	1	7	2	59	0.313089
CUBN	1	7	2	59	0.313089
INPP4B	1	7	2	59	0.313089
MYH13	1	7	2	59	0.313089
TMEM132D	1	7	2	59	0.313089
MLL2	0	8	11	50	0.338206
TP53	5	3	49	12	0.357963
CNTNAP2	1	7	3	58	0.396351
FAM135B	1	7	3	58	0.396351
MACF1	1	7	3	58	0.396351
MLL3	1	7	3	58	0.396351
NOTCH3	1	7	3	58	0.396351
PDE4DIP	1	7	3	58	0.396351
RELN	1	7	3	58	0.396351
DNAH5	1	7	4	57	0.470646
NOTCH2	1	7	4	57	0.470646
ZNF804B	1	7	4	57	0.470646
PIK3CA	0	8	8	53	0.582589
CDH9	0	8	7	54	0.588281
SI	0	8	7	54	0.588281
SPTA1	0	8	7	54	0.588281
ZFHX4	0	8	10	51	0.591997
NOTCH1	2	6	9	52	0.604445
CDKN2A	2	6	11	50	0.639426
SYNE1	1	7	14	47	0.675672
ABAT	0	8	1	60	1
ABCA12	0	8	3	58	1
ABCA4	0	8	2	59	1
ABCA9	0	8	2	59	1
ABCD2	0	8	1	60	1
ABHD13	0	8	0	61	1
ABL2	0	8	1	60	1
ACACB	0	8	0	61	1
ADAMTS12	0	8	3	58	1
ADAMTSL1	0	8	0	61	1
ADCY1	0	8	1	60	1
AIM1	0	8	1	60	1
AKT1	0	8	1	60	1
AKT3	0	8	1	60	1
AMD1	0	8	1	60	1
ANKHD1-EIF4EBP3	0	8	1	60	1
ANKRD17	0	8	1	60	1
ANO4	0	8	1	60	1
APOB	0	8	4	57	1
ARFGEF2	0	8	0	61	1
ARHGAP30	0	8	1	60	1
ARID1A	0	8	1	60	1
ASH1L	0	8	2	59	1
ASXL1	0	8	1	60	1
ATM	0	8	1	60	1
ATXN1	0	8	1	60	1
B2M	0	8	0	61	1
BAGE2	0	8	1	60	1
BAZ1B	0	8	1	60	1
BBS9	0	8	0	61	1
BBX	0	8	1	60	1
BCL9	0	8	0	61	1
BIRC3	0	8	0	61	1
BLM	0	8	1	60	1
BRCA1	0	8	0	61	1
BRCA2	0	8	1	60	1
BRD4	0	8	1	60	1
BRIP1	0	8	1	60	1
BTBD12	0	8	1	60	1
BZRAP1	0	8	1	60	1
C1orf173	0	8	4	57	1
CABIN1	0	8	0	61	1
CARD11	0	8	2	59	1
CBL	0	8	1	60	1
CCNA1	0	8	1	60	1
CCR2	0	8	1	60	1
CCR5	0	8	1	60	1
CD248	0	8	1	60	1
CD8A	0	8	0	61	1
CDH1	0	8	0	61	1
CDH10	0	8	0	61	1
CDH11	0	8	1	60	1
CELSR3	0	8	2	59	1
CHD5	0	8	0	61	1
CLCN4	0	8	0	61	1
CLSTN2	0	8	0	61	1
CNGA3	0	8	1	60	1
CNTN6	0	8	2	59	1
COL11A1	0	8	3	58	1
COL22A1	0	8	1	60	1
COQ3	0	8	1	60	1
CREBBP	0	8	0	61	1
CRIPAK	0	8	0	61	1
CSMD3	2	6	18	43	1
CTNNB1	0	8	1	60	1
CTNND2	0	8	0	61	1
CUL3	0	8	4	57	1
CYLD	0	8	1	60	1
CYP26A1	0	8	0	61	1
DCC	0	8	1	60	1
DCT	0	8	0	61	1
DDR2	0	8	4	57	1
DDX3X	0	8	0	61	1
DGKG	0	8	1	60	1
DICER1	0	8	3	58	1
DNAH3	0	8	1	60	1
DOK6	0	8	2	59	1
DPYS	0	8	1	60	1
DSCAM	0	8	2	59	1
DSEL	0	8	1	60	1
DSPP	0	8	2	59	1
DST	0	8	1	60	1
DUSP5	0	8	0	61	1
DYRK1B	0	8	1	60	1
E2F3	0	8	1	60	1
E2F7	0	8	0	61	1
EBF1	0	8	1	60	1
EFCAB6	0	8	1	60	1
EGFR	0	8	2	59	1
ENPP2	0	8	1	60	1
EP400	0	8	0	61	1
EPHA1	0	8	1	60	1
EPHA2	0	8	2	59	1
EPHA3	0	8	3	58	1
EPHA7	0	8	1	60	1
EPHB1	0	8	0	61	1
EPHB3	0	8	0	61	1
EPM2AIP1	0	8	1	60	1
EPS8	0	8	1	60	1
ERAS	0	8	0	61	1
ERBB3	0	8	0	61	1
ERBB4	0	8	2	59	1
ETV5	0	8	1	60	1
ETV6	0	8	0	61	1
EWSR1	0	8	0	61	1
EZH2	0	8	0	61	1
FAM179B	0	8	3	58	1
FAM5B	0	8	0	61	1
FANCA	0	8	1	60	1
FANCD2	0	8	0	61	1
FANCG	0	8	0	61	1
FANCM	0	8	1	60	1
FARP2	0	8	0	61	1
FAT2	0	8	5	56	1
FAT4	0	8	2	59	1
FBXW7	0	8	4	57	1
FGFR1	0	8	1	60	1
FGFR2	0	8	0	61	1
FGFR3	0	8	0	61	1
FGFR4	0	8	0	61	1
FLG	1	7	7	54	1
FLG2	0	8	0	61	1
FLT3	0	8	1	60	1
FOXP1	0	8	1	60	1
FSTL5	0	8	1	60	1
GABRB3	0	8	1	60	1
GAS7	0	8	1	60	1
GC	0	8	1	60	1
GMPS	0	8	1	60	1
GNAQ	0	8	1	60	1
GPC5	0	8	1	60	1
GPR174	0	8	1	60	1
GRM8	0	8	2	59	1
HBS1L	0	8	0	61	1
HDX	0	8	3	58	1
HERC2	0	8	1	60	1
HLA-A	0	8	0	61	1
HLA-B	0	8	0	61	1
HSCB	0	8	0	61	1
HUWE1	0	8	5	56	1
HYDIN	0	8	2	59	1
IL6ST	0	8	1	60	1
INCENP	0	8	0	61	1
INO80	0	8	0	61	1
INPP4A	0	8	2	59	1
INPP5D	0	8	0	61	1
INTS3	0	8	1	60	1
IRF6	0	8	1	60	1
ITK	0	8	0	61	1
JAK1	0	8	0	61	1
JAK2	0	8	1	60	1
KCTD8	0	8	1	60	1
KDM5A	0	8	0	61	1
KDR	0	8	2	59	1
KEAP1	0	8	4	57	1
KIAA1468	0	8	1	60	1
KIAA1549	0	8	2	59	1
KIAA2022	0	8	1	60	1
KIT	0	8	1	60	1
KRAS	0	8	1	60	1
KRT10	0	8	0	61	1
KRTAP4-3	0	8	0	61	1
KRTAP6-3	0	8	1	60	1
LAMB1	0	8	0	61	1
LILRA3	0	8	0	61	1
LILRA5	0	8	0	61	1
LILRB1	0	8	1	60	1
LILRB2	0	8	1	60	1
LOC200030	0	8	0	61	1
LOC642587	0	8	0	61	1
LRFN5	0	8	2	59	1
LRP1B	1	7	9	52	1
LRRC37B	0	8	0	61	1
LRRK2	0	8	1	60	1
LRRTM1	0	8	2	59	1
LTBP1	0	8	1	60	1
MAP2	0	8	4	57	1
MCOLN2	0	8	0	61	1
MDM2	0	8	0	61	1
MECOM	0	8	1	60	1
MED1	0	8	1	60	1
MEF2C	0	8	2	59	1
MKL1	0	8	0	61	1
MLF1	0	8	0	61	1
MLLT10	0	8	0	61	1
MMP16	0	8	0	61	1
MTA2	0	8	1	60	1
MTOR	0	8	3	58	1
MUC2	0	8	1	60	1
MUC21	0	8	1	60	1
MX2	0	8	0	61	1
MYC	0	8	0	61	1
MYH1	0	8	2	59	1
MYH11	0	8	1	60	1
MYH2	0	8	1	60	1
MYH4	0	8	0	61	1
MYH6	0	8	0	61	1
MYH7	0	8	0	61	1
MYH7B	0	8	0	61	1
MYH8	0	8	4	57	1
MYH9	0	8	1	60	1
NACA2	0	8	1	60	1
NAV3	0	8	4	57	1
NBPF3	0	8	0	61	1
NCOR1	0	8	2	59	1
NECAB1	0	8	1	60	1
NELL2	0	8	0	61	1
NF1	0	8	2	59	1
NFATC3	0	8	1	60	1
NFE2L2	0	8	1	60	1
NKAP	0	8	0	61	1
NLRP11	0	8	0	61	1
NLRP12	0	8	1	60	1
NLRP4	0	8	2	59	1
NONO	0	8	0	61	1
NRAP	0	8	1	60	1
NRAS	0	8	1	60	1
NRG2	0	8	1	60	1
NRK	0	8	0	61	1
NRXN3	0	8	1	60	1
NSD1	0	8	6	55	1
NTRK3	0	8	1	60	1
NUMA1	0	8	2	59	1
NUP214	0	8	0	61	1
ODZ1	0	8	3	58	1
OR4C15	0	8	1	60	1
OR51S1	0	8	1	60	1
OR8H1	0	8	1	60	1
OR8H2	0	8	1	60	1
OR8K1	0	8	0	61	1
PAK7	0	8	2	59	1
PALB2	0	8	0	61	1
PARK2	0	8	0	61	1
PBRM1	0	8	1	60	1
PCDH15	0	8	6	55	1
PCDH17	0	8	0	61	1
PCDHA1	0	8	0	61	1
PCDHA12	0	8	0	61	1
PCDHA13	0	8	0	61	1
PCDHA2	0	8	1	60	1
PCDHA6	0	8	1	60	1
PCDHA8	0	8	1	60	1
PCDHAC2	0	8	1	60	1
PCDHB11	0	8	2	59	1
PCDHB12	0	8	1	60	1
PCDHB4	0	8	1	60	1
PCLO	0	8	4	57	1
PCM1	0	8	1	60	1
PDE3A	0	8	4	57	1
PDGFRA	0	8	1	60	1
PEG3	0	8	0	61	1
PHIP	0	8	0	61	1
PHKA2	0	8	1	60	1
PHLPP1	0	8	1	60	1
PHLPP2	0	8	0	61	1
PIK3C2A	0	8	0	61	1
PIK3C2B	0	8	1	60	1
PIK3C2G	0	8	5	56	1
PIK3C3	0	8	0	61	1
PIK3CB	0	8	1	60	1
PIK3CG	0	8	5	56	1
PIK3R1	0	8	0	61	1
PIK3R2	0	8	0	61	1
PKD1L1	0	8	1	60	1
PKHD1	0	8	2	59	1
PKHD1L1	1	7	9	52	1
PKP4	0	8	1	60	1
PLAG1	0	8	0	61	1
PLCB1	0	8	2	59	1
PLEC	0	8	2	59	1
PLIN5	0	8	1	60	1
PLXNA1	0	8	1	60	1
PMS1	0	8	2	59	1
PMS2	0	8	0	61	1
POLQ	0	8	2	59	1
PPP1R9A	0	8	0	61	1
PPP4R4	0	8	1	60	1
PRDM11	0	8	1	60	1
PRDM7	0	8	0	61	1
PRDM9	0	8	2	59	1
PRKCA	0	8	0	61	1
PROKR2	0	8	1	60	1
PRR21	0	8	0	61	1
PTEN	0	8	1	60	1
PTK6	0	8	0	61	1
PTPRF	0	8	2	59	1
PZP	0	8	2	59	1
RAD51L1	0	8	0	61	1
RANBP17	0	8	1	60	1
RARG	0	8	1	60	1
RASA1	0	8	2	59	1
RB1	0	8	1	60	1
RB1CC1	0	8	5	56	1
RBM15	0	8	1	60	1
RECQL4	0	8	0	61	1
REST	0	8	0	61	1
RGAG1	0	8	2	59	1
RIMBP2	0	8	1	60	1
RIMS2	0	8	1	60	1
RIPK4	0	8	2	59	1
ROS1	0	8	3	58	1
RUFY1	0	8	0	61	1
RUNX1	0	8	0	61	1
RXFP3	0	8	1	60	1
SALL1	0	8	1	60	1
SBDS	0	8	0	61	1
SETBP1	0	8	2	59	1
SETD2	0	8	1	60	1
SFMBT2	0	8	1	60	1
SLC26A3	0	8	1	60	1
SLC2A13	0	8	1	60	1
SLITRK3	0	8	1	60	1
SMAD1	0	8	0	61	1
SMAD4	0	8	1	60	1
SMC6	0	8	1	60	1
SMO	0	8	0	61	1
SPAG17	0	8	1	60	1
SPTBN4	0	8	0	61	1
SPTLC2	0	8	0	61	1
SRGAP3	0	8	0	61	1
SRPK2	0	8	1	60	1
STAT1	0	8	0	61	1
STAT3	0	8	1	60	1
STYK1	0	8	1	60	1
SYNE2	0	8	6	55	1
TAP2	0	8	1	60	1
TDRD3	0	8	1	60	1
TET2	0	8	2	59	1
TEX15	0	8	0	61	1
TFRC	0	8	0	61	1
TGFBR2	0	8	1	60	1
THSD7A	0	8	4	57	1
TNFAIP3	0	8	0	61	1
TP63	0	8	1	60	1
TPM3	0	8	1	60	1
TPP2	0	8	1	60	1
TPRX1	0	8	3	58	1
TRAF3	0	8	0	61	1
TRIO	0	8	2	59	1
TRIP11	0	8	0	61	1
TRRAP	0	8	0	61	1
TSC1	0	8	2	59	1
TSC2	0	8	0	61	1
TTN	3	5	22	39	1
UBE3A	0	8	0	61	1
UBE4A	0	8	0	61	1
UBR5	0	8	6	55	1
UNC5D	0	8	3	58	1
USH2A	1	7	9	52	1
USP26	0	8	1	60	1
USP6	0	8	0	61	1
VPS41	0	8	1	60	1
WBSCR17	0	8	2	59	1
WDR63	0	8	2	59	1
WHSC1	0	8	1	60	1
WHSC1L1	0	8	1	60	1
WT1	0	8	0	61	1
XPC	0	8	1	60	1
XRCC6	0	8	1	60	1
ZEB2	0	8	1	60	1
ZNF180	0	8	1	60	1
ZNF19	0	8	1	60	1
ZNF217	0	8	0	61	1
ZNF426	0	8	0	61	1
ZNF433	0	8	1	60	1
ZNF439	0	8	1	60	1
ZNF440	0	8	1	60	1
ZNF443	0	8	1	60	1
ZNF461	0	8	0	61	1
ZNF501	0	8	0	61	1
ZNF521	0	8	4	57	1
ZNF665	0	8	0	61	1
ZNF699	0	8	1	60	1
ZNF761	0	8	1	60	1
ZNF790	0	8	1	60	1
ZNF799	0	8	1	60	1
ZNF823	0	8	1	60	1
ZNF83	0	8	0	61	1

## Sheet: S2(F) Failure vs. Non-failure
Supplementary Table S2(F).1 Mutation event difference between failure and non-failure in all tumor samples
Gene Name	Mutation Event in non-failure	No Mutation Event in non-failure	Mutation Event in-failure	No Mutation Event in -failure	P Value
PMS1	0	79	3	38	0.0379576
DDR2	1	78	4	37	0.0459115
NOTCH2	1	78	4	37	0.0459115
TPRX1	6	73	0	41	0.0935355
CUL3	1	78	3	38	0.114846
DSEL	1	78	3	38	0.114846
NOTCH3	1	78	3	38	0.114846
RIPK4	1	78	3	38	0.114846
ABAT	0	79	2	39	0.114846
CDH10	0	79	2	39	0.114846
DST	0	79	2	39	0.114846
EFCAB6	0	79	2	39	0.114846
EGFR	0	79	2	39	0.114846
NBPF1	0	79	2	39	0.114846
SETBP1	0	79	2	39	0.114846
ZEB2	0	79	2	39	0.114846
CNTNAP2	5	74	0	41	0.16417
APOB	2	77	4	37	0.178954
MYH8	2	77	4	37	0.178954
CDH12	3	76	4	37	0.228513
CSMD3	14	65	11	30	0.247893
NOTCH1	12	67	3	38	0.258696
EZH2	1	78	2	39	0.268623
HDX	1	78	2	39	0.268623
KDR	1	78	2	39	0.268623
NKAPL	1	78	2	39	0.268623
PBRM1	1	78	2	39	0.268623
PIK3C3	1	78	2	39	0.268623
SLC26A3	1	78	2	39	0.268623
DNAH5	4	75	5	36	0.27104
GRM8	4	75	0	41	0.297753
INPP4B	4	75	0	41	0.297753
KRAS	4	75	0	41	0.297753
ODZ1	4	75	0	41	0.297753
PLCB1	4	75	0	41	0.297753
RB1	4	75	0	41	0.297753
TMEM132D	4	75	0	41	0.297753
SYNE2	5	74	5	36	0.306935
LRP1B	6	73	6	35	0.335258
PKHD1L1	6	73	6	35	0.335258
CNTN6	2	77	3	38	0.336506
NAV3	2	77	3	38	0.336506
NF1	2	77	3	38	0.336506
ADCY1	0	79	1	40	0.341667
AIM1	0	79	1	40	0.341667
AMD1	0	79	1	40	0.341667
ARFGEF2	0	79	1	40	0.341667
ATXN1	0	79	1	40	0.341667
BBS9	0	79	1	40	0.341667
BRCA1	0	79	1	40	0.341667
BRD4	0	79	1	40	0.341667
BZRAP1	0	79	1	40	0.341667
CBL	0	79	1	40	0.341667
CD248	0	79	1	40	0.341667
CNGA3	0	79	1	40	0.341667
DGKG	0	79	1	40	0.341667
DYRK1B	0	79	1	40	0.341667
E2F3	0	79	1	40	0.341667
EPS8	0	79	1	40	0.341667
ETV5	0	79	1	40	0.341667
EWSR1	0	79	1	40	0.341667
FAM5B	0	79	1	40	0.341667
GMPS	0	79	1	40	0.341667
HLA-B	0	79	1	40	0.341667
ITK	0	79	1	40	0.341667
JAK1	0	79	1	40	0.341667
KIT	0	79	1	40	0.341667
KRT10	0	79	1	40	0.341667
KRTAP4-3	0	79	1	40	0.341667
LILRB1	0	79	1	40	0.341667
LILRB2	0	79	1	40	0.341667
LOC642587	0	79	1	40	0.341667
LRRC37B	0	79	1	40	0.341667
LTBP1	0	79	1	40	0.341667
MDM2	0	79	1	40	0.341667
MLF1	0	79	1	40	0.341667
MMP16	0	79	1	40	0.341667
MUC21	0	79	1	40	0.341667
NACA2	0	79	1	40	0.341667
NCOA3	0	79	1	40	0.341667
NECAB1	0	79	1	40	0.341667
NELL2	0	79	1	40	0.341667
NF2	0	79	1	40	0.341667
NFATC3	0	79	1	40	0.341667
NLRP12	0	79	1	40	0.341667
OR4C15	0	79	1	40	0.341667
OR5L2	0	79	1	40	0.341667
OR8K1	0	79	1	40	0.341667
PCDHB12	0	79	1	40	0.341667
PCDHB4	0	79	1	40	0.341667
PCM1	0	79	1	40	0.341667
PDGFRA	0	79	1	40	0.341667
PHKA2	0	79	1	40	0.341667
PHKB	0	79	1	40	0.341667
PHLPP2	0	79	1	40	0.341667
PIK3R1	0	79	1	40	0.341667
PLAG1	0	79	1	40	0.341667
PLIN5	0	79	1	40	0.341667
PPP1R9A	0	79	1	40	0.341667
PRDM7	0	79	1	40	0.341667
PROKR2	0	79	1	40	0.341667
RANBP17	0	79	1	40	0.341667
RBM15	0	79	1	40	0.341667
SETD2	0	79	1	40	0.341667
SMAD1	0	79	1	40	0.341667
SMAD4	0	79	1	40	0.341667
SMC6	0	79	1	40	0.341667
SMO	0	79	1	40	0.341667
SPTLC2	0	79	1	40	0.341667
STYK1	0	79	1	40	0.341667
TDRD3	0	79	1	40	0.341667
UBE3A	0	79	1	40	0.341667
UBE4A	0	79	1	40	0.341667
WHSC1L1	0	79	1	40	0.341667
ZNF180	0	79	1	40	0.341667
ZNF439	0	79	1	40	0.341667
ZNF699	0	79	1	40	0.341667
ZNF823	0	79	1	40	0.341667
USH2A	7	72	6	35	0.363477
ZFHX4	9	70	7	34	0.406129
TTN	24	55	16	25	0.414922
FGFR3	6	73	1	40	0.42009
NSD1	6	73	1	40	0.42009
PIK3CA	11	68	8	33	0.439429
ADAMTS12	4	75	4	37	0.442817
CDH9	4	75	4	37	0.442817
PCDH15	4	75	4	37	0.442817
PCLO	4	75	4	37	0.442817
UBR5	4	75	4	37	0.442817
HUWE1	8	71	2	39	0.491247
ABCA4	2	77	0	41	0.546359
ABCA6	2	77	0	41	0.546359
ABL2	2	77	0	41	0.546359
BAGE2	2	77	0	41	0.546359
CDH11	2	77	0	41	0.546359
COQ3	2	77	0	41	0.546359
CRIPAK	2	77	0	41	0.546359
DOK6	2	77	0	41	0.546359
EBF1	2	77	0	41	0.546359
FANCD2	2	77	0	41	0.546359
FSTL5	2	77	0	41	0.546359
JAK2	2	77	0	41	0.546359
KIAA1468	2	77	0	41	0.546359
KIAA2022	2	77	0	41	0.546359
LRRTM1	2	77	0	41	0.546359
MED1	2	77	0	41	0.546359
MYH9	2	77	0	41	0.546359
NLRP11	2	77	0	41	0.546359
NRK	2	77	0	41	0.546359
NUP214	2	77	0	41	0.546359
PIK3CB	2	77	0	41	0.546359
PPP4R4	2	77	0	41	0.546359
RXFP3	2	77	0	41	0.546359
SRPK2	2	77	0	41	0.546359
TEX15	2	77	0	41	0.546359
USP26	2	77	0	41	0.546359
VPS41	2	77	0	41	0.546359
VWA5A	2	77	0	41	0.546359
WBSCR17	2	77	0	41	0.546359
WDR63	2	77	0	41	0.546359
XRCC6	2	77	0	41	0.546359
ZNF799	2	77	0	41	0.546359
ABCA12	3	76	0	41	0.550203
ASXL1	3	76	0	41	0.550203
CTNND2	3	76	0	41	0.550203
DICER1	3	76	0	41	0.550203
EPHA3	3	76	0	41	0.550203
ERBB4	3	76	0	41	0.550203
MYH1	3	76	0	41	0.550203
NCOR1	3	76	0	41	0.550203
NFE2L2	3	76	0	41	0.550203
PCDHB11	3	76	0	41	0.550203
PHLPP1	3	76	0	41	0.550203
RASA1	3	76	0	41	0.550203
RGAG1	3	76	0	41	0.550203
TFRC	3	76	0	41	0.550203
TGFBR2	3	76	0	41	0.550203
TPP2	3	76	0	41	0.550203
FLG	8	71	6	35	0.551649
FAT1	11	68	4	37	0.576146
BBX	2	77	2	39	0.605306
COL6A3	2	77	2	39	0.605306
CYLD	2	77	2	39	0.605306
DSCAM	2	77	2	39	0.605306
EPHA7	2	77	2	39	0.605306
FAM135B	2	77	2	39	0.605306
FAT4	2	77	2	39	0.605306
HRAS	2	77	2	39	0.605306
INPP4A	2	77	2	39	0.605306
KIAA1549	2	77	2	39	0.605306
LRFN5	2	77	2	39	0.605306
MAML3	2	77	2	39	0.605306
PAK7	2	77	2	39	0.605306
PKD1L1	2	77	2	39	0.605306
ROS1	2	77	2	39	0.605306
SYNE1	15	64	6	35	0.620872
C1orf173	4	75	1	40	0.659747
DNAH3	4	75	1	40	0.659747
MACF1	4	75	1	40	0.659747
MAP2	4	75	1	40	0.659747
RELN	4	75	1	40	0.659747
ASH1L	5	74	1	40	0.662706
PDE4DIP	5	74	1	40	0.662706
THSD7A	5	74	1	40	0.662706
MTOR	4	75	3	38	0.689334
RB1CC1	4	75	3	38	0.689334
SI	6	73	4	37	0.733771
CDKN2A	8	71	5	36	0.762036
ABCA9	1	78	1	40	1
APC	1	78	1	40	1
ARHGAP30	1	78	1	40	1
ARID1A	1	78	1	40	1
BLM	1	78	1	40	1
BRIP1	1	78	1	40	1
BTBD12	1	78	1	40	1
CARD11	1	78	1	40	1
CREBBP	1	78	1	40	1
CUBN	4	75	2	39	1
E2F7	1	78	1	40	1
EP300	4	75	2	39	1
FANCA	1	78	1	40	1
FBXW7	4	75	2	39	1
FGFR2	1	78	1	40	1
FLG2	1	78	1	40	1
FLT3	1	78	1	40	1
GPR174	1	78	1	40	1
IRF6	1	78	1	40	1
KCTD8	1	78	1	40	1
MEF2C	1	78	1	40	1
MLL2	11	68	5	36	1
MYH11	1	78	1	40	1
MYH2	1	78	1	40	1
MYH4	1	78	1	40	1
NLRP4	1	78	1	40	1
NRAP	1	78	1	40	1
NRXN3	1	78	1	40	1
NUMA1	1	78	1	40	1
PCDHA8	1	78	1	40	1
PKP4	1	78	1	40	1
PRDM9	1	78	1	40	1
PRKCA	1	78	1	40	1
PZP	1	78	1	40	1
RIMS2	1	78	1	40	1
SFRS14	1	78	1	40	1
SLC2A13	1	78	1	40	1
SLCO5A1	1	78	1	40	1
SLITRK3	1	78	1	40	1
TAP2	1	78	1	40	1
TRAF3	1	78	1	40	1
TRIO	1	78	1	40	1
WRN	1	78	1	40	1
YTHDC1	1	78	1	40	1
ZNF521	4	75	2	39	1
ZNF790	1	78	1	40	1
ABCD2	3	76	1	40	1
ABHD13	1	78	0	41	1
ACACB	1	78	0	41	1
ADAMTSL1	1	78	0	41	1
AHNAK	5	74	3	38	1
AKAP1	1	78	0	41	1
AKT1	1	78	0	41	1
AKT3	1	78	0	41	1
ANKHD1-EIF4EBP3	1	78	0	41	1
ANKRD17	1	78	0	41	1
ANO4	1	78	0	41	1
ATM	1	78	0	41	1
B2M	1	78	0	41	1
BAZ1B	1	78	0	41	1
BCL9	1	78	0	41	1
BIRC3	1	78	0	41	1
BRCA2	3	76	1	40	1
CABIN1	1	78	0	41	1
CASP8	2	77	1	40	1
CCNA1	1	78	0	41	1
CCR2	1	78	0	41	1
CCR5	1	78	0	41	1
CD8A	1	78	0	41	1
CDH1	1	78	0	41	1
CELSR3	2	77	1	40	1
CHD5	1	78	0	41	1
CLCN4	1	78	0	41	1
CLSTN2	1	78	0	41	1
COL11A1	5	74	2	39	1
COL22A1	1	78	0	41	1
CTNNB1	1	78	0	41	1
CYP26A1	1	78	0	41	1
DCC	1	78	0	41	1
DCT	1	78	0	41	1
DDX3X	3	76	1	40	1
DPYS	1	78	0	41	1
DSPP	2	77	1	40	1
DUSP5	1	78	0	41	1
ENPP2	1	78	0	41	1
EP400	1	78	0	41	1
EPHA1	1	78	0	41	1
EPHA2	3	76	1	40	1
EPHB1	1	78	0	41	1
EPHB3	1	78	0	41	1
EPM2AIP1	1	78	0	41	1
ERAS	1	78	0	41	1
ERBB3	1	78	0	41	1
ETV6	1	78	0	41	1
FAM179B	3	76	1	40	1
FANCG	1	78	0	41	1
FANCM	1	78	0	41	1
FARP2	1	78	0	41	1
FAT2	5	74	2	39	1
FGFR1	1	78	0	41	1
FGFR4	1	78	0	41	1
FOXP1	1	78	0	41	1
GABRB3	1	78	0	41	1
GAS7	2	77	1	40	1
GC	1	78	0	41	1
GNAQ	1	78	0	41	1
GPC5	2	77	1	40	1
HBS1L	0	79	0	41	1
HERC2	1	78	0	41	1
HLA-A	1	78	0	41	1
HSCB	1	78	0	41	1
HYDIN	2	77	1	40	1
IL6ST	1	78	0	41	1
INCENP	1	78	0	41	1
INO80	1	78	0	41	1
INPP5D	1	78	0	41	1
INTS3	1	78	0	41	1
KDM5A	1	78	0	41	1
KEAP1	3	76	1	40	1
KRTAP6-3	1	78	0	41	1
LAMB1	1	78	0	41	1
LILRA3	1	78	0	41	1
LILRA5	1	78	0	41	1
LOC200030	1	78	0	41	1
LRRK2	1	78	0	41	1
LRRTM3	1	78	0	41	1
MAP3K1	1	78	0	41	1
MCOLN2	1	78	0	41	1
MECOM	1	78	0	41	1
MKL1	1	78	0	41	1
MLL3	5	74	3	38	1
MLLT10	1	78	0	41	1
MST1R	1	78	0	41	1
MTA2	1	78	0	41	1
MUC2	3	76	1	40	1
MX2	1	78	0	41	1
MYC	1	78	0	41	1
MYH13	3	76	1	40	1
MYH6	1	78	0	41	1
MYH7	1	78	0	41	1
MYH7B	1	78	0	41	1
NBPF3	1	78	0	41	1
NKAP	1	78	0	41	1
NONO	1	78	0	41	1
NRAS	1	78	0	41	1
NRG2	2	77	1	40	1
NTRK3	1	78	0	41	1
OR51S1	1	78	0	41	1
OR8H1	1	78	0	41	1
OR8H2	1	78	0	41	1
PALB2	1	78	0	41	1
PARK2	1	78	0	41	1
PCDH17	1	78	0	41	1
PCDHA1	1	78	0	41	1
PCDHA12	1	78	0	41	1
PCDHA13	1	78	0	41	1
PCDHA2	1	78	0	41	1
PCDHA6	1	78	0	41	1
PCDHAC2	1	78	0	41	1
PDE3A	3	76	2	39	1
PEG3	3	76	2	39	1
PHIP	1	78	0	41	1
PIK3C2A	1	78	0	41	1
PIK3C2B	1	78	0	41	1
PIK3C2G	3	76	2	39	1
PIK3CG	3	76	2	39	1
PIK3R2	1	78	0	41	1
PKHD1	3	76	1	40	1
PLEC	2	77	1	40	1
PLXNA1	1	78	0	41	1
PMS2	1	78	0	41	1
POLQ	3	76	2	39	1
PRDM11	1	78	0	41	1
PRR21	1	78	0	41	1
PTEN	1	78	0	41	1
PTK6	0	79	0	41	1
PTPRF	2	77	1	40	1
RAD51L1	1	78	0	41	1
RARG	1	78	0	41	1
RECQL4	1	78	0	41	1
REST	2	77	1	40	1
RIMBP2	1	78	0	41	1
RUFY1	1	78	0	41	1
RUNX1	1	78	0	41	1
SALL1	1	78	0	41	1
SBDS	1	78	0	41	1
SFMBT2	1	78	0	41	1
SMARCA4	1	78	0	41	1
SPAG17	2	77	1	40	1
SPTA1	5	74	3	38	1
SPTBN4	1	78	0	41	1
SRGAP3	1	78	0	41	1
STAT1	2	77	1	40	1
STAT3	1	78	0	41	1
TET2	2	77	1	40	1
TNFAIP3	1	78	0	41	1
TP53	37	42	19	22	1
TP63	2	77	1	40	1
TPM3	1	78	0	41	1
TRIP11	1	78	0	41	1
TRRAP	2	77	1	40	1
TSC1	2	77	1	40	1
TSC2	1	78	0	41	1
UNC5D	3	76	1	40	1
USP6	1	78	0	41	1
WHSC1	1	78	0	41	1
WT1	1	78	0	41	1
XPC	1	78	0	41	1
ZNF19	1	78	0	41	1
ZNF217	1	78	0	41	1
ZNF426	1	78	0	41	1
ZNF433	1	78	0	41	1
ZNF440	1	78	0	41	1
ZNF443	1	78	0	41	1
ZNF461	1	78	0	41	1
ZNF501	1	78	0	41	1
ZNF534	1	78	0	41	1
ZNF571	1	78	0	41	1
ZNF665	1	78	0	41	1
ZNF761	1	78	0	41	1
ZNF804B	5	74	2	39	1
ZNF83	1	78	0	41	1
Supplementary Table S2(F).2 Mutation event difference between failure and non-failure in all oropharynx tumor samples
Gene Name	Mutation Event in non-failure	No Mutation Event in non-failure	Mutation Event in-failure	No Mutation Event in -failure	P Value
SPTA1	0	46	3	18	0.0277633
CDH9	1	45	3	18	0.0876279
CDKN2A	1	45	3	18	0.0876279
HUWE1	7	39	0	21	0.0887696
ABAT	0	46	2	19	0.0949796
APOB	0	46	2	19	0.0949796
EFCAB6	0	46	2	19	0.0949796
NOTCH3	0	46	2	19	0.0949796
PMS1	0	46	2	19	0.0949796
TP53	8	38	8	13	0.119934
FGFR3	6	40	0	21	0.165855
ASH1L	5	41	0	21	0.172549
COL11A1	5	41	0	21	0.172549
UBR5	4	42	4	17	0.246568
DNAH3	4	42	0	21	0.30053
KRAS	4	42	0	21	0.30053
TPRX1	4	42	0	21	0.30053
ABCA9	0	46	1	20	0.313433
ARID1A	0	46	1	20	0.313433
ATXN1	0	46	1	20	0.313433
CBL	0	46	1	20	0.313433
CDH10	0	46	1	20	0.313433
DST	0	46	1	20	0.313433
EGFR	0	46	1	20	0.313433
EWSR1	0	46	1	20	0.313433
FAM135B	0	46	1	20	0.313433
GMPS	0	46	1	20	0.313433
KRTAP4-3	0	46	1	20	0.313433
LILRB1	0	46	1	20	0.313433
LILRB2	0	46	1	20	0.313433
LOC642587	0	46	1	20	0.313433
LRRC37B	0	46	1	20	0.313433
MDM2	0	46	1	20	0.313433
MEF2C	0	46	1	20	0.313433
MMP16	0	46	1	20	0.313433
NAV3	0	46	1	20	0.313433
NBPF1	0	46	1	20	0.313433
NECAB1	0	46	1	20	0.313433
NOTCH2	0	46	1	20	0.313433
NRXN3	0	46	1	20	0.313433
NUMA1	0	46	1	20	0.313433
PCDHB4	0	46	1	20	0.313433
PCM1	0	46	1	20	0.313433
PDGFRA	0	46	1	20	0.313433
PHKA2	0	46	1	20	0.313433
PIK3C2G	0	46	1	20	0.313433
PIK3CG	0	46	1	20	0.313433
PLIN5	0	46	1	20	0.313433
PPP1R9A	0	46	1	20	0.313433
RBM15	0	46	1	20	0.313433
RIMS2	0	46	1	20	0.313433
ROS1	0	46	1	20	0.313433
SETD2	0	46	1	20	0.313433
SMAD1	0	46	1	20	0.313433
TDRD3	0	46	1	20	0.313433
TRIO	0	46	1	20	0.313433
YTHDC1	0	46	1	20	0.313433
ZNF439	0	46	1	20	0.313433
ZNF699	0	46	1	20	0.313433
SYNE2	3	43	3	18	0.368162
TTN	14	32	9	12	0.40764
FAT1	7	39	1	20	0.418901
BRIP1	1	45	1	20	0.531886
BTBD12	1	45	1	20	0.531886
COL6A3	1	45	1	20	0.531886
DDR2	1	45	1	20	0.531886
DSCAM	1	45	1	20	0.531886
DSEL	1	45	1	20	0.531886
EZH2	1	45	1	20	0.531886
FGFR2	1	45	1	20	0.531886
HRAS	1	45	1	20	0.531886
HYDIN	1	45	1	20	0.531886
MACF1	1	45	1	20	0.531886
MYH2	1	45	1	20	0.531886
NKAPL	1	45	1	20	0.531886
PBRM1	1	45	1	20	0.531886
PCDHA8	1	45	1	20	0.531886
PDE3A	1	45	1	20	0.531886
PIK3C3	1	45	1	20	0.531886
PRKCA	1	45	1	20	0.531886
PTPRF	1	45	1	20	0.531886
RIPK4	1	45	1	20	0.531886
SLC26A3	1	45	1	20	0.531886
TAP2	1	45	1	20	0.531886
CTNND2	3	43	0	21	0.54629
FAT2	3	43	0	21	0.54629
MLL3	3	43	0	21	0.54629
NFE2L2	3	43	0	21	0.54629
PEG3	3	43	0	21	0.54629
PHLPP1	3	43	0	21	0.54629
PKHD1L1	3	43	0	21	0.54629
PLCB1	3	43	0	21	0.54629
POLQ	3	43	0	21	0.54629
RB1	3	43	0	21	0.54629
TFRC	3	43	0	21	0.54629
THSD7A	3	43	0	21	0.54629
ZNF804B	3	43	0	21	0.54629
ADAMTS12	2	44	2	19	0.584099
CUBN	2	44	2	19	0.584099
LRP1B	2	44	2	19	0.584099
MYH8	2	44	2	19	0.584099
PAK7	2	44	2	19	0.584099
PCDH15	2	44	2	19	0.584099
PCLO	2	44	2	19	0.584099
ZNF521	2	44	2	19	0.584099
EP300	3	43	2	19	0.645164
SI	3	43	2	19	0.645164
ZFHX4	4	42	3	18	0.668994
NOTCH1	5	41	3	18	0.698417
SYNE1	5	41	3	18	0.698417
FLG	7	39	2	19	0.70864
PIK3CA	10	36	4	17	1
ABCA12	0	46	0	21	1
ABCA4	0	46	0	21	1
ABCA6	0	46	0	21	1
ABCD2	3	43	1	20	1
ABHD13	1	45	0	21	1
ABL2	1	45	0	21	1
ACACB	1	45	0	21	1
ADAMTSL1	1	45	0	21	1
ADCY1	0	46	0	21	1
AHNAK	3	43	1	20	1
AIM1	0	46	0	21	1
AKAP1	0	46	0	21	1
AKT1	0	46	0	21	1
AKT3	0	46	0	21	1
AMD1	0	46	0	21	1
ANKHD1-EIF4EBP3	0	46	0	21	1
ANKRD17	1	45	0	21	1
ANO4	1	45	0	21	1
APC	0	46	0	21	1
ARFGEF2	0	46	0	21	1
ARHGAP30	1	45	0	21	1
ASXL1	2	44	0	21	1
ATM	0	46	0	21	1
B2M	1	45	0	21	1
BAGE2	1	45	0	21	1
BAZ1B	1	45	0	21	1
BBS9	0	46	0	21	1
BBX	2	44	1	20	1
BCL9	1	45	0	21	1
BIRC3	1	45	0	21	1
BLM	1	45	0	21	1
BRCA1	0	46	0	21	1
BRCA2	3	43	1	20	1
BRD4	0	46	0	21	1
BZRAP1	0	46	0	21	1
C1orf173	1	45	0	21	1
CABIN1	1	45	0	21	1
CARD11	1	45	0	21	1
CASP8	1	45	0	21	1
CCNA1	0	46	0	21	1
CCR2	0	46	0	21	1
CCR5	1	45	0	21	1
CD248	0	46	0	21	1
CD8A	1	45	0	21	1
CDH1	1	45	0	21	1
CDH11	1	45	0	21	1
CDH12	2	44	1	20	1
CELSR3	0	46	0	21	1
CHD5	1	45	0	21	1
CLCN4	1	45	0	21	1
CLSTN2	1	45	0	21	1
CNGA3	0	46	0	21	1
CNTN6	2	44	1	20	1
CNTNAP2	1	45	0	21	1
COL22A1	0	46	0	21	1
COQ3	1	45	0	21	1
CREBBP	1	45	0	21	1
CRIPAK	2	44	0	21	1
CSMD3	8	38	4	17	1
CTNNB1	0	46	0	21	1
CUL3	1	45	0	21	1
CYLD	2	44	1	20	1
CYP26A1	1	45	0	21	1
DCC	0	46	0	21	1
DCT	1	45	0	21	1
DDX3X	2	44	1	20	1
DGKG	0	46	0	21	1
DICER1	2	44	0	21	1
DNAH5	2	44	1	20	1
DOK6	1	45	0	21	1
DPYS	0	46	0	21	1
DSPP	2	44	0	21	1
DUSP5	1	45	0	21	1
DYRK1B	0	46	0	21	1
E2F3	0	46	0	21	1
E2F7	1	45	0	21	1
EBF1	1	45	0	21	1
ENPP2	0	46	0	21	1
EP400	1	45	0	21	1
EPHA1	1	45	0	21	1
EPHA2	2	44	0	21	1
EPHA3	0	46	0	21	1
EPHA7	2	44	1	20	1
EPHB1	1	45	0	21	1
EPHB3	1	45	0	21	1
EPM2AIP1	1	45	0	21	1
EPS8	0	46	0	21	1
ERAS	1	45	0	21	1
ERBB3	1	45	0	21	1
ERBB4	1	45	0	21	1
ETV5	0	46	0	21	1
ETV6	1	45	0	21	1
FAM179B	1	45	0	21	1
FAM5B	0	46	0	21	1
FANCA	1	45	0	21	1
FANCD2	2	44	0	21	1
FANCG	1	45	0	21	1
FANCM	0	46	0	21	1
FARP2	1	45	0	21	1
FAT4	1	45	0	21	1
FBXW7	2	44	1	20	1
FGFR1	0	46	0	21	1
FGFR4	1	45	0	21	1
FLG2	1	45	0	21	1
FLT3	1	45	0	21	1
FOXP1	0	46	0	21	1
FSTL5	1	45	0	21	1
GABRB3	0	46	0	21	1
GAS7	2	44	0	21	1
GC	0	46	0	21	1
GNAQ	0	46	0	21	1
GPC5	2	44	1	20	1
GPR174	1	45	0	21	1
GRM8	2	44	0	21	1
HBS1L	0	46	0	21	1
HDX	0	46	0	21	1
HERC2	0	46	0	21	1
HLA-A	1	45	0	21	1
HLA-B	0	46	0	21	1
HSCB	1	45	0	21	1
IL6ST	0	46	0	21	1
INCENP	1	45	0	21	1
INO80	1	45	0	21	1
INPP4A	2	44	1	20	1
INPP4B	1	45	0	21	1
INPP5D	1	45	0	21	1
INTS3	0	46	0	21	1
IRF6	1	45	0	21	1
ITK	0	46	0	21	1
JAK1	0	46	0	21	1
JAK2	1	45	0	21	1
KCTD8	1	45	0	21	1
KDM5A	1	45	0	21	1
KDR	0	46	0	21	1
KEAP1	0	46	0	21	1
KIAA1468	1	45	0	21	1
KIAA1549	1	45	0	21	1
KIAA2022	1	45	0	21	1
KIT	0	46	0	21	1
KRT10	0	46	0	21	1
KRTAP6-3	1	45	0	21	1
LAMB1	1	45	0	21	1
LILRA3	1	45	0	21	1
LILRA5	1	45	0	21	1
LOC200030	1	45	0	21	1
LRFN5	2	44	0	21	1
LRRK2	0	46	0	21	1
LRRTM1	1	45	0	21	1
LRRTM3	0	46	0	21	1
LTBP1	0	46	0	21	1
MAML3	2	44	1	20	1
MAP2	1	45	0	21	1
MAP3K1	0	46	0	21	1
MCOLN2	1	45	0	21	1
MECOM	0	46	0	21	1
MED1	1	45	0	21	1
MKL1	1	45	0	21	1
MLF1	0	46	0	21	1
MLL2	7	39	3	18	1
MLLT10	1	45	0	21	1
MST1R	0	46	0	21	1
MTA2	1	45	0	21	1
MTOR	3	43	1	20	1
MUC2	2	44	1	20	1
MUC21	0	46	0	21	1
MX2	1	45	0	21	1
MYC	1	45	0	21	1
MYH1	1	45	0	21	1
MYH11	0	46	0	21	1
MYH13	1	45	0	21	1
MYH4	1	45	0	21	1
MYH6	1	45	0	21	1
MYH7	1	45	0	21	1
MYH7B	1	45	0	21	1
MYH9	1	45	0	21	1
NACA2	0	46	0	21	1
NBPF3	1	45	0	21	1
NCOA3	0	46	0	21	1
NCOR1	1	45	0	21	1
NELL2	0	46	0	21	1
NF1	2	44	1	20	1
NF2	0	46	0	21	1
NFATC3	0	46	0	21	1
NKAP	1	45	0	21	1
NLRP11	2	44	0	21	1
NLRP12	0	46	0	21	1
NLRP4	0	46	0	21	1
NONO	1	45	0	21	1
NRAP	0	46	0	21	1
NRAS	1	45	0	21	1
NRG2	2	44	0	21	1
NRK	2	44	0	21	1
NSD1	1	45	0	21	1
NTRK3	0	46	0	21	1
NUP214	2	44	0	21	1
ODZ1	1	45	0	21	1
OR4C15	0	46	0	21	1
OR51S1	0	46	0	21	1
OR5L2	0	46	0	21	1
OR8H1	1	45	0	21	1
OR8H2	0	46	0	21	1
OR8K1	0	46	0	21	1
PALB2	1	45	0	21	1
PARK2	1	45	0	21	1
PCDH17	1	45	0	21	1
PCDHA1	1	45	0	21	1
PCDHA12	1	45	0	21	1
PCDHA13	1	45	0	21	1
PCDHA2	0	46	0	21	1
PCDHA6	0	46	0	21	1
PCDHAC2	0	46	0	21	1
PCDHB11	1	45	0	21	1
PCDHB12	0	46	0	21	1
PDE4DIP	3	43	1	20	1
PHIP	1	45	0	21	1
PHKB	0	46	0	21	1
PHLPP2	0	46	0	21	1
PIK3C2A	1	45	0	21	1
PIK3C2B	0	46	0	21	1
PIK3CB	1	45	0	21	1
PIK3R1	0	46	0	21	1
PIK3R2	1	45	0	21	1
PKD1L1	2	44	1	20	1
PKHD1	2	44	0	21	1
PKP4	1	45	0	21	1
PLAG1	0	46	0	21	1
PLEC	2	44	0	21	1
PLXNA1	0	46	0	21	1
PMS2	1	45	0	21	1
PPP4R4	1	45	0	21	1
PRDM11	0	46	0	21	1
PRDM7	0	46	0	21	1
PRDM9	0	46	0	21	1
PROKR2	0	46	0	21	1
PRR21	1	45	0	21	1
PTEN	0	46	0	21	1
PTK6	0	46	0	21	1
PZP	0	46	0	21	1
RAD51L1	1	45	0	21	1
RANBP17	0	46	0	21	1
RARG	1	45	0	21	1
RASA1	1	45	0	21	1
RB1CC1	2	44	1	20	1
RECQL4	1	45	0	21	1
RELN	0	46	0	21	1
REST	2	44	1	20	1
RGAG1	2	44	0	21	1
RIMBP2	0	46	0	21	1
RUFY1	1	45	0	21	1
RUNX1	1	45	0	21	1
RXFP3	2	44	0	21	1
SALL1	0	46	0	21	1
SBDS	1	45	0	21	1
SETBP1	0	46	0	21	1
SFMBT2	0	46	0	21	1
SFRS14	1	45	0	21	1
SLC2A13	0	46	0	21	1
SLCO5A1	0	46	0	21	1
SLITRK3	1	45	0	21	1
SMAD4	0	46	0	21	1
SMARCA4	0	46	0	21	1
SMC6	0	46	0	21	1
SMO	0	46	0	21	1
SPAG17	2	44	1	20	1
SPTBN4	1	45	0	21	1
SPTLC2	0	46	0	21	1
SRGAP3	1	45	0	21	1
SRPK2	1	45	0	21	1
STAT1	2	44	1	20	1
STAT3	0	46	0	21	1
STYK1	0	46	0	21	1
TET2	1	45	0	21	1
TEX15	2	44	0	21	1
TGFBR2	2	44	0	21	1
TMEM132D	1	45	0	21	1
TNFAIP3	1	45	0	21	1
TP63	2	44	0	21	1
TPM3	0	46	0	21	1
TPP2	2	44	0	21	1
TRAF3	1	45	0	21	1
TRIP11	1	45	0	21	1
TRRAP	2	44	1	20	1
TSC1	2	44	0	21	1
TSC2	1	45	0	21	1
UBE3A	0	46	0	21	1
UBE4A	0	46	0	21	1
UNC5D	1	45	0	21	1
USH2A	4	42	1	20	1
USP26	1	45	0	21	1
USP6	1	45	0	21	1
VPS41	1	45	0	21	1
VWA5A	0	46	0	21	1
WBSCR17	1	45	0	21	1
WDR63	0	46	0	21	1
WHSC1	0	46	0	21	1
WHSC1L1	0	46	0	21	1
WRN	1	45	0	21	1
WT1	1	45	0	21	1
XPC	0	46	0	21	1
XRCC6	1	45	0	21	1
ZEB2	0	46	0	21	1
ZNF180	0	46	0	21	1
ZNF19	0	46	0	21	1
ZNF217	1	45	0	21	1
ZNF426	1	45	0	21	1
ZNF433	0	46	0	21	1
ZNF440	0	46	0	21	1
ZNF443	0	46	0	21	1
ZNF461	1	45	0	21	1
ZNF501	1	45	0	21	1
ZNF534	0	46	0	21	1
ZNF571	0	46	0	21	1
ZNF665	1	45	0	21	1
ZNF761	0	46	0	21	1
ZNF790	1	45	0	21	1
ZNF799	1	45	0	21	1
ZNF823	0	46	0	21	1
ZNF83	1	45	0	21	1
Supplementary Table S2(F).3 Mutation event difference between failure and non-failure in HPV+ tumor samples
Gene Name	Mutation Event in non-failure	No Mutation Event in non-failure	Mutation Event in-failure	No Mutation Event in -failure	P Value
APOB	0	39	2	10	0.0517647
CDH10	0	39	2	10	0.0517647
ADAMTS12	2	37	3	9	0.0779533
CSMD3	2	37	3	9	0.0779533
COL6A3	1	38	2	10	0.134166
DSEL	1	38	2	10	0.134166
EZH2	1	38	2	10	0.134166
PIK3C3	1	38	2	10	0.134166
FAT1	7	32	0	12	0.177313
CDH12	2	37	2	10	0.232017
DNAH5	2	37	2	10	0.232017
MTOR	2	37	2	10	0.232017
PCLO	2	37	2	10	0.232017
ABAT	0	39	1	11	0.235294
APC	0	39	1	11	0.235294
ARFGEF2	0	39	1	11	0.235294
ARID1A	0	39	1	11	0.235294
BBS9	0	39	1	11	0.235294
BRCA1	0	39	1	11	0.235294
CDH9	0	39	1	11	0.235294
CELSR3	0	39	1	11	0.235294
DST	0	39	1	11	0.235294
EFCAB6	0	39	1	11	0.235294
EWSR1	0	39	1	11	0.235294
FAM5B	0	39	1	11	0.235294
FANCA	0	39	1	11	0.235294
HLA-B	0	39	1	11	0.235294
ITK	0	39	1	11	0.235294
JAK1	0	39	1	11	0.235294
KDR	0	39	1	11	0.235294
KRT10	0	39	1	11	0.235294
KRTAP4-3	0	39	1	11	0.235294
LOC642587	0	39	1	11	0.235294
LRRC37B	0	39	1	11	0.235294
MAP2	0	39	1	11	0.235294
MDM2	0	39	1	11	0.235294
MLF1	0	39	1	11	0.235294
MMP16	0	39	1	11	0.235294
MYH11	0	39	1	11	0.235294
NAV3	0	39	1	11	0.235294
NELL2	0	39	1	11	0.235294
NRAP	0	39	1	11	0.235294
NRXN3	0	39	1	11	0.235294
OR8K1	0	39	1	11	0.235294
PHLPP2	0	39	1	11	0.235294
PIK3R1	0	39	1	11	0.235294
PLAG1	0	39	1	11	0.235294
PMS1	0	39	1	11	0.235294
PPP1R9A	0	39	1	11	0.235294
PRDM7	0	39	1	11	0.235294
RELN	0	39	1	11	0.235294
RIMS2	0	39	1	11	0.235294
ROS1	0	39	1	11	0.235294
SLC2A13	0	39	1	11	0.235294
SMAD1	0	39	1	11	0.235294
SMO	0	39	1	11	0.235294
SPTA1	0	39	1	11	0.235294
SPTLC2	0	39	1	11	0.235294
UBE3A	0	39	1	11	0.235294
UBE4A	0	39	1	11	0.235294
ZEB2	0	39	1	11	0.235294
ZNF790	0	39	1	11	0.235294
FLG	6	33	0	12	0.314935
HUWE1	5	34	0	12	0.323054
CREBBP	1	38	1	11	0.418824
DSCAM	1	38	1	11	0.418824
E2F7	1	38	1	11	0.418824
FAT2	1	38	1	11	0.418824
FAT4	1	38	1	11	0.418824
FGFR2	1	38	1	11	0.418824
FLG2	1	38	1	11	0.418824
HRAS	1	38	1	11	0.418824
KIAA1549	1	38	1	11	0.418824
LRFN5	1	38	1	11	0.418824
LRP1B	1	38	1	11	0.418824
MYH4	1	38	1	11	0.418824
MYH8	1	38	1	11	0.418824
NKAPL	1	38	1	11	0.418824
PBRM1	1	38	1	11	0.418824
PDE4DIP	1	38	1	11	0.418824
PKHD1	1	38	1	11	0.418824
PRKCA	1	38	1	11	0.418824
RB1CC1	1	38	1	11	0.418824
RIPK4	1	38	1	11	0.418824
SLC26A3	1	38	1	11	0.418824
TRAF3	1	38	1	11	0.418824
PIK3CA	10	29	1	11	0.42213
BBX	2	37	1	11	0.561152
BRCA2	2	37	1	11	0.561152
CNTN6	2	37	1	11	0.561152
CUBN	2	37	1	11	0.561152
CYLD	2	37	1	11	0.561152
DNAH3	4	35	0	12	0.561152
EPHA7	2	37	1	11	0.561152
MUC2	2	37	1	11	0.561152
NF1	2	37	1	11	0.561152
NOTCH1	4	35	0	12	0.561152
PKD1L1	2	37	1	11	0.561152
POLQ	2	37	1	11	0.561152
REST	2	37	1	11	0.561152
SI	2	37	1	11	0.561152
STAT1	2	37	1	11	0.561152
TRRAP	2	37	1	11	0.561152
PEG3	3	36	2	10	0.579827
SYNE1	4	35	2	10	0.616364
ZFHX4	4	35	2	10	0.616364
TTN	11	28	4	8	0.730178
ABCA12	0	39	0	12	1
ABCA4	0	39	0	12	1
ABCA6	0	39	0	12	1
ABCA9	0	39	0	12	1
ABCD2	3	36	0	12	1
ABHD13	1	38	0	12	1
ABL2	1	38	0	12	1
ACACB	1	38	0	12	1
ADAMTSL1	1	38	0	12	1
ADCY1	0	39	0	12	1
AHNAK	3	36	0	12	1
AIM1	0	39	0	12	1
AKAP1	0	39	0	12	1
AKT1	0	39	0	12	1
AKT3	0	39	0	12	1
AMD1	0	39	0	12	1
ANKHD1-EIF4EBP3	0	39	0	12	1
ANKRD17	0	39	0	12	1
ANO4	0	39	0	12	1
ARHGAP30	1	38	0	12	1
ASH1L	3	36	1	11	1
ASXL1	2	37	0	12	1
ATM	0	39	0	12	1
ATXN1	0	39	0	12	1
B2M	1	38	0	12	1
BAGE2	1	38	0	12	1
BAZ1B	0	39	0	12	1
BCL9	1	38	0	12	1
BIRC3	1	38	0	12	1
BLM	1	38	0	12	1
BRD4	0	39	0	12	1
BRIP1	1	38	0	12	1
BTBD12	1	38	0	12	1
BZRAP1	0	39	0	12	1
C1orf173	1	38	0	12	1
CABIN1	1	38	0	12	1
CARD11	0	39	0	12	1
CASP8	1	38	0	12	1
CBL	0	39	0	12	1
CCNA1	0	39	0	12	1
CCR2	0	39	0	12	1
CCR5	0	39	0	12	1
CD248	0	39	0	12	1
CD8A	1	38	0	12	1
CDH1	1	38	0	12	1
CDH11	1	38	0	12	1
CDKN2A	0	39	0	12	1
CHD5	1	38	0	12	1
CLCN4	1	38	0	12	1
CLSTN2	1	38	0	12	1
CNGA3	0	39	0	12	1
CNTNAP2	1	38	0	12	1
COL11A1	3	36	1	11	1
COL22A1	0	39	0	12	1
COQ3	1	38	0	12	1
CRIPAK	2	37	0	12	1
CTNNB1	0	39	0	12	1
CTNND2	3	36	0	12	1
CUL3	0	39	0	12	1
CYP26A1	1	38	0	12	1
DCC	0	39	0	12	1
DCT	1	38	0	12	1
DDR2	1	38	0	12	1
DDX3X	3	36	1	11	1
DGKG	0	39	0	12	1
DICER1	0	39	0	12	1
DOK6	0	39	0	12	1
DPYS	0	39	0	12	1
DSPP	1	38	0	12	1
DUSP5	1	38	0	12	1
DYRK1B	0	39	0	12	1
E2F3	0	39	0	12	1
EBF1	1	38	0	12	1
EGFR	0	39	0	12	1
ENPP2	0	39	0	12	1
EP300	3	36	1	11	1
EP400	1	38	0	12	1
EPHA1	0	39	0	12	1
EPHA2	2	37	0	12	1
EPHA3	0	39	0	12	1
EPHB1	1	38	0	12	1
EPHB3	1	38	0	12	1
EPM2AIP1	0	39	0	12	1
EPS8	0	39	0	12	1
ERAS	1	38	0	12	1
ERBB3	1	38	0	12	1
ERBB4	1	38	0	12	1
ETV5	0	39	0	12	1
ETV6	1	38	0	12	1
FAM135B	0	39	0	12	1
FAM179B	1	38	0	12	1
FANCD2	2	37	0	12	1
FANCG	1	38	0	12	1
FANCM	0	39	0	12	1
FARP2	1	38	0	12	1
FBXW7	2	37	0	12	1
FGFR1	0	39	0	12	1
FGFR3	6	33	1	11	1
FGFR4	1	38	0	12	1
FLT3	1	38	0	12	1
FOXP1	0	39	0	12	1
FSTL5	1	38	0	12	1
GABRB3	0	39	0	12	1
GAS7	2	37	0	12	1
GC	0	39	0	12	1
GMPS	0	39	0	12	1
GNAQ	0	39	0	12	1
GPC5	2	37	0	12	1
GPR174	1	38	0	12	1
GRM8	2	37	0	12	1
HBS1L	0	39	0	12	1
HDX	0	39	0	12	1
HERC2	0	39	0	12	1
HLA-A	1	38	0	12	1
HSCB	1	38	0	12	1
HYDIN	1	38	0	12	1
IL6ST	0	39	0	12	1
INCENP	1	38	0	12	1
INO80	1	38	0	12	1
INPP4A	2	37	0	12	1
INPP4B	1	38	0	12	1
INPP5D	1	38	0	12	1
INTS3	0	39	0	12	1
IRF6	1	38	0	12	1
JAK2	1	38	0	12	1
KCTD8	1	38	0	12	1
KDM5A	1	38	0	12	1
KEAP1	0	39	0	12	1
KIAA1468	1	38	0	12	1
KIAA2022	1	38	0	12	1
KIT	0	39	0	12	1
KRAS	3	36	0	12	1
KRTAP6-3	0	39	0	12	1
LAMB1	1	38	0	12	1
LILRA3	1	38	0	12	1
LILRA5	1	38	0	12	1
LILRB1	0	39	0	12	1
LILRB2	0	39	0	12	1
LOC200030	1	38	0	12	1
LRRK2	0	39	0	12	1
LRRTM1	0	39	0	12	1
LRRTM3	0	39	0	12	1
LTBP1	0	39	0	12	1
MACF1	1	38	0	12	1
MAML3	2	37	0	12	1
MAP3K1	0	39	0	12	1
MCOLN2	1	38	0	12	1
MECOM	0	39	0	12	1
MED1	1	38	0	12	1
MEF2C	0	39	0	12	1
MKL1	1	38	0	12	1
MLL2	4	35	1	11	1
MLL3	3	36	1	11	1
MLLT10	1	38	0	12	1
MST1R	0	39	0	12	1
MTA2	0	39	0	12	1
MUC21	0	39	0	12	1
MX2	1	38	0	12	1
MYC	1	38	0	12	1
MYH1	1	38	0	12	1
MYH13	1	38	0	12	1
MYH2	1	38	0	12	1
MYH6	1	38	0	12	1
MYH7	1	38	0	12	1
MYH7B	1	38	0	12	1
MYH9	1	38	0	12	1
NACA2	0	39	0	12	1
NBPF1	0	39	0	12	1
NBPF3	1	38	0	12	1
NCOA3	0	39	0	12	1
NCOR1	1	38	0	12	1
NECAB1	0	39	0	12	1
NF2	0	39	0	12	1
NFATC3	0	39	0	12	1
NFE2L2	2	37	0	12	1
NKAP	1	38	0	12	1
NLRP11	2	37	0	12	1
NLRP12	0	39	0	12	1
NLRP4	0	39	0	12	1
NONO	1	38	0	12	1
NOTCH2	0	39	0	12	1
NOTCH3	0	39	0	12	1
NRAS	0	39	0	12	1
NRG2	2	37	0	12	1
NRK	2	37	0	12	1
NSD1	1	38	0	12	1
NTRK3	0	39	0	12	1
NUMA1	0	39	0	12	1
NUP214	2	37	0	12	1
ODZ1	1	38	0	12	1
OR4C15	0	39	0	12	1
OR51S1	0	39	0	12	1
OR5L2	0	39	0	12	1
OR8H1	0	39	0	12	1
OR8H2	0	39	0	12	1
PAK7	2	37	0	12	1
PALB2	1	38	0	12	1
PARK2	1	38	0	12	1
PCDH15	2	37	0	12	1
PCDH17	1	38	0	12	1
PCDHA1	1	38	0	12	1
PCDHA12	1	38	0	12	1
PCDHA13	1	38	0	12	1
PCDHA2	0	39	0	12	1
PCDHA6	0	39	0	12	1
PCDHA8	1	38	0	12	1
PCDHAC2	0	39	0	12	1
PCDHB11	1	38	0	12	1
PCDHB12	0	39	0	12	1
PCDHB4	0	39	0	12	1
PCM1	0	39	0	12	1
PDE3A	1	38	0	12	1
PDGFRA	0	39	0	12	1
PHIP	1	38	0	12	1
PHKA2	0	39	0	12	1
PHKB	0	39	0	12	1
PHLPP1	2	37	0	12	1
PIK3C2A	1	38	0	12	1
PIK3C2B	0	39	0	12	1
PIK3C2G	0	39	0	12	1
PIK3CB	1	38	0	12	1
PIK3CG	0	39	0	12	1
PIK3R2	1	38	0	12	1
PKHD1L1	2	37	0	12	1
PKP4	1	38	0	12	1
PLCB1	2	37	0	12	1
PLEC	1	38	0	12	1
PLIN5	0	39	0	12	1
PLXNA1	0	39	0	12	1
PMS2	1	38	0	12	1
PPP4R4	1	38	0	12	1
PRDM11	0	39	0	12	1
PRDM9	0	39	0	12	1
PROKR2	0	39	0	12	1
PRR21	1	38	0	12	1
PTEN	0	39	0	12	1
PTK6	0	39	0	12	1
PTPRF	1	38	0	12	1
PZP	0	39	0	12	1
RAD51L1	1	38	0	12	1
RANBP17	0	39	0	12	1
RARG	0	39	0	12	1
RASA1	1	38	0	12	1
RB1	3	36	0	12	1
RBM15	0	39	0	12	1
RECQL4	1	38	0	12	1
RGAG1	1	38	0	12	1
RIMBP2	0	39	0	12	1
RUFY1	1	38	0	12	1
RUNX1	1	38	0	12	1
RXFP3	1	38	0	12	1
SALL1	0	39	0	12	1
SBDS	1	38	0	12	1
SETBP1	0	39	0	12	1
SETD2	0	39	0	12	1
SFMBT2	0	39	0	12	1
SFRS14	0	39	0	12	1
SLCO5A1	0	39	0	12	1
SLITRK3	1	38	0	12	1
SMAD4	0	39	0	12	1
SMARCA4	0	39	0	12	1
SMC6	0	39	0	12	1
SPAG17	2	37	0	12	1
SPTBN4	1	38	0	12	1
SRGAP3	1	38	0	12	1
SRPK2	1	38	0	12	1
STAT3	0	39	0	12	1
STYK1	0	39	0	12	1
SYNE2	3	36	1	11	1
TAP2	1	38	0	12	1
TDRD3	0	39	0	12	1
TET2	1	38	0	12	1
TEX15	2	37	0	12	1
TFRC	3	36	0	12	1
TGFBR2	2	37	0	12	1
THSD7A	2	37	0	12	1
TMEM132D	1	38	0	12	1
TNFAIP3	1	38	0	12	1
TP53	2	37	0	12	1
TP63	2	37	0	12	1
TPM3	0	39	0	12	1
TPP2	2	37	0	12	1
TPRX1	3	36	0	12	1
TRIO	0	39	0	12	1
TRIP11	1	38	0	12	1
TSC1	1	38	0	12	1
TSC2	1	38	0	12	1
UBR5	2	37	0	12	1
UNC5D	1	38	0	12	1
USH2A	3	36	0	12	1
USP26	1	38	0	12	1
USP6	1	38	0	12	1
VPS41	1	38	0	12	1
VWA5A	0	39	0	12	1
WBSCR17	0	39	0	12	1
WDR63	0	39	0	12	1
WHSC1	0	39	0	12	1
WHSC1L1	0	39	0	12	1
WRN	0	39	0	12	1
WT1	1	38	0	12	1
XPC	0	39	0	12	1
XRCC6	1	38	0	12	1
YTHDC1	0	39	0	12	1
ZNF180	0	39	0	12	1
ZNF19	0	39	0	12	1
ZNF217	1	38	0	12	1
ZNF426	1	38	0	12	1
ZNF433	0	39	0	12	1
ZNF439	0	39	0	12	1
ZNF440	0	39	0	12	1
ZNF443	0	39	0	12	1
ZNF461	1	38	0	12	1
ZNF501	1	38	0	12	1
ZNF521	2	37	0	12	1
ZNF534	0	39	0	12	1
ZNF571	0	39	0	12	1
ZNF665	1	38	0	12	1
ZNF699	0	39	0	12	1
ZNF761	0	39	0	12	1
ZNF799	1	38	0	12	1
ZNF804B	2	37	0	12	1
ZNF823	0	39	0	12	1
ZNF83	1	38	0	12	1
Supplementary Table S2(F).4 Mutation event difference between failure and non-failure in HPV+ oropharynx tumor samples
Gene Name	Mutation Event in non-failure	No Mutation Event in non-failure	Mutation Event in-failure	No Mutation Event in -failure	P Value
CSMD3	2	36	2	7	0.160491
ABAT	0	38	1	8	0.191489
APOB	0	38	1	8	0.191489
ARID1A	0	38	1	8	0.191489
CDH10	0	38	1	8	0.191489
EFCAB6	0	38	1	8	0.191489
EWSR1	0	38	1	8	0.191489
KRTAP4-3	0	38	1	8	0.191489
LOC642587	0	38	1	8	0.191489
LRRC37B	0	38	1	8	0.191489
MDM2	0	38	1	8	0.191489
MMP16	0	38	1	8	0.191489
NRXN3	0	38	1	8	0.191489
PMS1	0	38	1	8	0.191489
PPP1R9A	0	38	1	8	0.191489
RIMS2	0	38	1	8	0.191489
SMAD1	0	38	1	8	0.191489
SPTA1	0	38	1	8	0.191489
FAT1	7	31	0	9	0.317618
COL6A3	1	37	1	8	0.349676
DSCAM	1	37	1	8	0.349676
DSEL	1	37	1	8	0.349676
EZH2	1	37	1	8	0.349676
FGFR2	1	37	1	8	0.349676
HRAS	1	37	1	8	0.349676
MYH8	1	37	1	8	0.349676
NKAPL	1	37	1	8	0.349676
PDE4DIP	1	37	1	8	0.349676
PIK3C3	1	37	1	8	0.349676
PRKCA	1	37	1	8	0.349676
ADAMTS12	2	36	1	8	0.479741
BBX	2	36	1	8	0.479741
BRCA2	2	36	1	8	0.479741
CDH12	2	36	1	8	0.479741
CUBN	2	36	1	8	0.479741
CYLD	2	36	1	8	0.479741
DDX3X	2	36	1	8	0.479741
DNAH5	2	36	1	8	0.479741
MUC2	2	36	1	8	0.479741
PCLO	2	36	1	8	0.479741
REST	2	36	1	8	0.479741
SI	2	36	1	8	0.479741
STAT1	2	36	1	8	0.479741
TRRAP	2	36	1	8	0.479741
HUWE1	5	33	0	9	0.566909
DNAH3	4	34	0	9	0.574334
NOTCH1	4	34	0	9	0.574334
FGFR3	6	32	0	9	0.579283
FLG	6	32	0	9	0.579283
PIK3CA	10	28	1	8	0.663066
ABCD2	3	35	0	9	1
AHNAK	3	35	0	9	1
ASH1L	3	35	0	9	1
COL11A1	3	35	0	9	1
CTNND2	3	35	0	9	1
KRAS	3	35	0	9	1
MLL3	3	35	0	9	1
PEG3	3	35	0	9	1
RB1	3	35	0	9	1
TFRC	3	35	0	9	1
TPRX1	3	35	0	9	1
USH2A	3	35	0	9	1
ABCA12	0	38	0	9	1
ABCA4	0	38	0	9	1
ABCA6	0	38	0	9	1
ABCA9	0	38	0	9	1
ABHD13	1	37	0	9	1
ABL2	1	37	0	9	1
ACACB	1	37	0	9	1
ADAMTSL1	1	37	0	9	1
ADCY1	0	38	0	9	1
AIM1	0	38	0	9	1
AKAP1	0	38	0	9	1
AKT1	0	38	0	9	1
AKT3	0	38	0	9	1
AMD1	0	38	0	9	1
ANKHD1-EIF4EBP3	0	38	0	9	1
ANKRD17	0	38	0	9	1
ANO4	0	38	0	9	1
APC	0	38	0	9	1
ARFGEF2	0	38	0	9	1
ARHGAP30	1	37	0	9	1
ASXL1	2	36	0	9	1
ATM	0	38	0	9	1
ATXN1	0	38	0	9	1
B2M	1	37	0	9	1
BAGE2	1	37	0	9	1
BAZ1B	0	38	0	9	1
BBS9	0	38	0	9	1
BCL9	1	37	0	9	1
BIRC3	1	37	0	9	1
BLM	1	37	0	9	1
BRCA1	0	38	0	9	1
BRD4	0	38	0	9	1
BRIP1	1	37	0	9	1
BTBD12	1	37	0	9	1
BZRAP1	0	38	0	9	1
C1orf173	1	37	0	9	1
CABIN1	1	37	0	9	1
CARD11	0	38	0	9	1
CASP8	1	37	0	9	1
CBL	0	38	0	9	1
CCNA1	0	38	0	9	1
CCR2	0	38	0	9	1
CCR5	0	38	0	9	1
CD248	0	38	0	9	1
CD8A	1	37	0	9	1
CDH1	1	37	0	9	1
CDH11	1	37	0	9	1
CDH9	0	38	0	9	1
CDKN2A	0	38	0	9	1
CELSR3	0	38	0	9	1
CHD5	1	37	0	9	1
CLCN4	1	37	0	9	1
CLSTN2	1	37	0	9	1
CNGA3	0	38	0	9	1
CNTN6	2	36	0	9	1
CNTNAP2	1	37	0	9	1
COL22A1	0	38	0	9	1
COQ3	1	37	0	9	1
CREBBP	1	37	0	9	1
CRIPAK	2	36	0	9	1
CTNNB1	0	38	0	9	1
CUL3	0	38	0	9	1
CYP26A1	1	37	0	9	1
DCC	0	38	0	9	1
DCT	1	37	0	9	1
DDR2	1	37	0	9	1
DGKG	0	38	0	9	1
DICER1	0	38	0	9	1
DOK6	0	38	0	9	1
DPYS	0	38	0	9	1
DSPP	1	37	0	9	1
DST	0	38	0	9	1
DUSP5	1	37	0	9	1
DYRK1B	0	38	0	9	1
E2F3	0	38	0	9	1
E2F7	1	37	0	9	1
EBF1	1	37	0	9	1
EGFR	0	38	0	9	1
ENPP2	0	38	0	9	1
EP300	3	35	1	8	1
EP400	1	37	0	9	1
EPHA1	0	38	0	9	1
EPHA2	2	36	0	9	1
EPHA3	0	38	0	9	1
EPHA7	2	36	0	9	1
EPHB1	1	37	0	9	1
EPHB3	1	37	0	9	1
EPM2AIP1	0	38	0	9	1
EPS8	0	38	0	9	1
ERAS	1	37	0	9	1
ERBB3	1	37	0	9	1
ERBB4	1	37	0	9	1
ETV5	0	38	0	9	1
ETV6	1	37	0	9	1
FAM135B	0	38	0	9	1
FAM179B	1	37	0	9	1
FAM5B	0	38	0	9	1
FANCA	0	38	0	9	1
FANCD2	2	36	0	9	1
FANCG	1	37	0	9	1
FANCM	0	38	0	9	1
FARP2	1	37	0	9	1
FAT2	1	37	0	9	1
FAT4	1	37	0	9	1
FBXW7	2	36	0	9	1
FGFR1	0	38	0	9	1
FGFR4	1	37	0	9	1
FLG2	1	37	0	9	1
FLT3	1	37	0	9	1
FOXP1	0	38	0	9	1
FSTL5	1	37	0	9	1
GABRB3	0	38	0	9	1
GAS7	2	36	0	9	1
GC	0	38	0	9	1
GMPS	0	38	0	9	1
GNAQ	0	38	0	9	1
GPC5	2	36	0	9	1
GPR174	1	37	0	9	1
GRM8	2	36	0	9	1
HBS1L	0	38	0	9	1
HDX	0	38	0	9	1
HERC2	0	38	0	9	1
HLA-A	1	37	0	9	1
HLA-B	0	38	0	9	1
HSCB	1	37	0	9	1
HYDIN	1	37	0	9	1
IL6ST	0	38	0	9	1
INCENP	1	37	0	9	1
INO80	1	37	0	9	1
INPP4A	2	36	0	9	1
INPP4B	1	37	0	9	1
INPP5D	1	37	0	9	1
INTS3	0	38	0	9	1
IRF6	1	37	0	9	1
ITK	0	38	0	9	1
JAK1	0	38	0	9	1
JAK2	1	37	0	9	1
KCTD8	1	37	0	9	1
KDM5A	1	37	0	9	1
KDR	0	38	0	9	1
KEAP1	0	38	0	9	1
KIAA1468	1	37	0	9	1
KIAA1549	1	37	0	9	1
KIAA2022	1	37	0	9	1
KIT	0	38	0	9	1
KRT10	0	38	0	9	1
KRTAP6-3	0	38	0	9	1
LAMB1	1	37	0	9	1
LILRA3	1	37	0	9	1
LILRA5	1	37	0	9	1
LILRB1	0	38	0	9	1
LILRB2	0	38	0	9	1
LOC200030	1	37	0	9	1
LRFN5	1	37	0	9	1
LRP1B	1	37	0	9	1
LRRK2	0	38	0	9	1
LRRTM1	0	38	0	9	1
LRRTM3	0	38	0	9	1
LTBP1	0	38	0	9	1
MACF1	1	37	0	9	1
MAML3	2	36	0	9	1
MAP2	0	38	0	9	1
MAP3K1	0	38	0	9	1
MCOLN2	1	37	0	9	1
MECOM	0	38	0	9	1
MED1	1	37	0	9	1
MEF2C	0	38	0	9	1
MKL1	1	37	0	9	1
MLF1	0	38	0	9	1
MLL2	4	34	1	8	1
MLLT10	1	37	0	9	1
MST1R	0	38	0	9	1
MTA2	0	38	0	9	1
MTOR	2	36	0	9	1
MUC21	0	38	0	9	1
MX2	1	37	0	9	1
MYC	1	37	0	9	1
MYH1	1	37	0	9	1
MYH11	0	38	0	9	1
MYH13	1	37	0	9	1
MYH2	1	37	0	9	1
MYH4	1	37	0	9	1
MYH6	1	37	0	9	1
MYH7	1	37	0	9	1
MYH7B	1	37	0	9	1
MYH9	1	37	0	9	1
NACA2	0	38	0	9	1
NAV3	0	38	0	9	1
NBPF1	0	38	0	9	1
NBPF3	1	37	0	9	1
NCOA3	0	38	0	9	1
NCOR1	1	37	0	9	1
NECAB1	0	38	0	9	1
NELL2	0	38	0	9	1
NF1	2	36	0	9	1
NF2	0	38	0	9	1
NFATC3	0	38	0	9	1
NFE2L2	2	36	0	9	1
NKAP	1	37	0	9	1
NLRP11	2	36	0	9	1
NLRP12	0	38	0	9	1
NLRP4	0	38	0	9	1
NONO	1	37	0	9	1
NOTCH2	0	38	0	9	1
NOTCH3	0	38	0	9	1
NRAP	0	38	0	9	1
NRAS	0	38	0	9	1
NRG2	2	36	0	9	1
NRK	2	36	0	9	1
NSD1	1	37	0	9	1
NTRK3	0	38	0	9	1
NUMA1	0	38	0	9	1
NUP214	2	36	0	9	1
ODZ1	1	37	0	9	1
OR4C15	0	38	0	9	1
OR51S1	0	38	0	9	1
OR5L2	0	38	0	9	1
OR8H1	0	38	0	9	1
OR8H2	0	38	0	9	1
OR8K1	0	38	0	9	1
PAK7	2	36	0	9	1
PALB2	1	37	0	9	1
PARK2	1	37	0	9	1
PBRM1	1	37	0	9	1
PCDH15	2	36	0	9	1
PCDH17	1	37	0	9	1
PCDHA1	1	37	0	9	1
PCDHA12	1	37	0	9	1
PCDHA13	1	37	0	9	1
PCDHA2	0	38	0	9	1
PCDHA6	0	38	0	9	1
PCDHA8	1	37	0	9	1
PCDHAC2	0	38	0	9	1
PCDHB11	1	37	0	9	1
PCDHB12	0	38	0	9	1
PCDHB4	0	38	0	9	1
PCM1	0	38	0	9	1
PDE3A	1	37	0	9	1
PDGFRA	0	38	0	9	1
PHIP	1	37	0	9	1
PHKA2	0	38	0	9	1
PHKB	0	38	0	9	1
PHLPP1	2	36	0	9	1
PHLPP2	0	38	0	9	1
PIK3C2A	1	37	0	9	1
PIK3C2B	0	38	0	9	1
PIK3C2G	0	38	0	9	1
PIK3CB	1	37	0	9	1
PIK3CG	0	38	0	9	1
PIK3R1	0	38	0	9	1
PIK3R2	1	37	0	9	1
PKD1L1	2	36	0	9	1
PKHD1	1	37	0	9	1
PKHD1L1	2	36	0	9	1
PKP4	1	37	0	9	1
PLAG1	0	38	0	9	1
PLCB1	2	36	0	9	1
PLEC	1	37	0	9	1
PLIN5	0	38	0	9	1
PLXNA1	0	38	0	9	1
PMS2	1	37	0	9	1
POLQ	2	36	0	9	1
PPP4R4	1	37	0	9	1
PRDM11	0	38	0	9	1
PRDM7	0	38	0	9	1
PRDM9	0	38	0	9	1
PROKR2	0	38	0	9	1
PRR21	1	37	0	9	1
PTEN	0	38	0	9	1
PTK6	0	38	0	9	1
PTPRF	1	37	0	9	1
PZP	0	38	0	9	1
RAD51L1	1	37	0	9	1
RANBP17	0	38	0	9	1
RARG	0	38	0	9	1
RASA1	1	37	0	9	1
RB1CC1	1	37	0	9	1
RBM15	0	38	0	9	1
RECQL4	1	37	0	9	1
RELN	0	38	0	9	1
RGAG1	1	37	0	9	1
RIMBP2	0	38	0	9	1
RIPK4	1	37	0	9	1
ROS1	0	38	0	9	1
RUFY1	1	37	0	9	1
RUNX1	1	37	0	9	1
RXFP3	1	37	0	9	1
SALL1	0	38	0	9	1
SBDS	1	37	0	9	1
SETBP1	0	38	0	9	1
SETD2	0	38	0	9	1
SFMBT2	0	38	0	9	1
SFRS14	0	38	0	9	1
SLC26A3	1	37	0	9	1
SLC2A13	0	38	0	9	1
SLCO5A1	0	38	0	9	1
SLITRK3	1	37	0	9	1
SMAD4	0	38	0	9	1
SMARCA4	0	38	0	9	1
SMC6	0	38	0	9	1
SMO	0	38	0	9	1
SPAG17	2	36	0	9	1
SPTBN4	1	37	0	9	1
SPTLC2	0	38	0	9	1
SRGAP3	1	37	0	9	1
SRPK2	1	37	0	9	1
STAT3	0	38	0	9	1
STYK1	0	38	0	9	1
SYNE1	4	34	1	8	1
SYNE2	3	35	1	8	1
TAP2	1	37	0	9	1
TDRD3	0	38	0	9	1
TET2	1	37	0	9	1
TEX15	2	36	0	9	1
TGFBR2	2	36	0	9	1
THSD7A	2	36	0	9	1
TMEM132D	1	37	0	9	1
TNFAIP3	1	37	0	9	1
TP53	2	36	0	9	1
TP63	2	36	0	9	1
TPM3	0	38	0	9	1
TPP2	2	36	0	9	1
TRAF3	1	37	0	9	1
TRIO	0	38	0	9	1
TRIP11	1	37	0	9	1
TSC1	1	37	0	9	1
TSC2	1	37	0	9	1
TTN	11	27	3	6	1
UBE3A	0	38	0	9	1
UBE4A	0	38	0	9	1
UBR5	2	36	0	9	1
UNC5D	1	37	0	9	1
USP26	1	37	0	9	1
USP6	1	37	0	9	1
VPS41	1	37	0	9	1
VWA5A	0	38	0	9	1
WBSCR17	0	38	0	9	1
WDR63	0	38	0	9	1
WHSC1	0	38	0	9	1
WHSC1L1	0	38	0	9	1
WRN	0	38	0	9	1
WT1	1	37	0	9	1
XPC	0	38	0	9	1
XRCC6	1	37	0	9	1
YTHDC1	0	38	0	9	1
ZEB2	0	38	0	9	1
ZFHX4	4	34	1	8	1
ZNF180	0	38	0	9	1
ZNF19	0	38	0	9	1
ZNF217	1	37	0	9	1
ZNF426	1	37	0	9	1
ZNF433	0	38	0	9	1
ZNF439	0	38	0	9	1
ZNF440	0	38	0	9	1
ZNF443	0	38	0	9	1
ZNF461	1	37	0	9	1
ZNF501	1	37	0	9	1
ZNF521	2	36	0	9	1
ZNF534	0	38	0	9	1
ZNF571	0	38	0	9	1
ZNF665	1	37	0	9	1
ZNF699	0	38	0	9	1
ZNF761	0	38	0	9	1
ZNF790	0	38	0	9	1
ZNF799	1	37	0	9	1
ZNF804B	2	36	0	9	1
ZNF823	0	38	0	9	1
ZNF83	1	37	0	9	1
Supplementary Table S2(F).5 Mutation event difference between failure and non-failure in HPV- tumor samples
Gene Name	Mutation Event in non-failure	No Mutation Event in non-failure	Mutation Event in-failure	No Mutation Event in -failure	P Value
PIK3CA	1	39	7	22	0.00797987
DDR2	0	40	4	25	0.0274737
TP53	35	5	19	10	0.0397075
FLG	2	38	6	23	0.0614897
CNTNAP2	4	36	0	29	0.133188
MAP2	4	36	0	29	0.133188
PDE4DIP	4	36	0	29	0.133188
RELN	4	36	0	29	0.133188
NOTCH2	1	39	4	25	0.15365
CNTN6	0	40	2	27	0.173061
EGFR	0	40	2	27	0.173061
INPP4A	0	40	2	27	0.173061
MAML3	0	40	2	27	0.173061
NBPF1	0	40	2	27	0.173061
NF1	0	40	2	27	0.173061
PAK7	0	40	2	27	0.173061
PMS1	0	40	2	27	0.173061
RIPK4	0	40	2	27	0.173061
SETBP1	0	40	2	27	0.173061
PCDH15	2	38	4	25	0.230146
SYNE2	2	38	4	25	0.230146
UBR5	2	38	4	25	0.230146
SYNE1	11	29	4	25	0.240392
ABCA12	3	37	0	29	0.258312
DICER1	3	37	0	29	0.258312
EPHA3	3	37	0	29	0.258312
INPP4B	3	37	0	29	0.258312
ODZ1	3	37	0	29	0.258312
TMEM132D	3	37	0	29	0.258312
TPRX1	3	37	0	29	0.258312
PKHD1L1	4	36	6	23	0.301741
USH2A	4	36	6	23	0.301741
CUL3	1	39	3	26	0.302256
MYH8	1	39	3	26	0.302256
NOTCH3	1	39	3	26	0.302256
NOTCH1	8	32	3	26	0.335898
NSD1	5	35	1	28	0.389328
FAT2	4	36	1	28	0.389474
ABAT	0	40	1	28	0.42029
ABCD2	0	40	1	28	0.42029
ADCY1	0	40	1	28	0.42029
AIM1	0	40	1	28	0.42029
AMD1	0	40	1	28	0.42029
ARHGAP30	0	40	1	28	0.42029
ATXN1	0	40	1	28	0.42029
BBX	0	40	1	28	0.42029
BLM	0	40	1	28	0.42029
BRD4	0	40	1	28	0.42029
BRIP1	0	40	1	28	0.42029
BTBD12	0	40	1	28	0.42029
BZRAP1	0	40	1	28	0.42029
CBL	0	40	1	28	0.42029
CD248	0	40	1	28	0.42029
CNGA3	0	40	1	28	0.42029
CYLD	0	40	1	28	0.42029
DGKG	0	40	1	28	0.42029
DNAH3	0	40	1	28	0.42029
DSEL	0	40	1	28	0.42029
DST	0	40	1	28	0.42029
DYRK1B	0	40	1	28	0.42029
E2F3	0	40	1	28	0.42029
EFCAB6	0	40	1	28	0.42029
EPHA7	0	40	1	28	0.42029
EPS8	0	40	1	28	0.42029
ETV5	0	40	1	28	0.42029
FLT3	0	40	1	28	0.42029
GAS7	0	40	1	28	0.42029
GMPS	0	40	1	28	0.42029
GPC5	0	40	1	28	0.42029
GPR174	0	40	1	28	0.42029
IRF6	0	40	1	28	0.42029
KCTD8	0	40	1	28	0.42029
KIT	0	40	1	28	0.42029
LILRB1	0	40	1	28	0.42029
LILRB2	0	40	1	28	0.42029
LTBP1	0	40	1	28	0.42029
MUC21	0	40	1	28	0.42029
MYH2	0	40	1	28	0.42029
NACA2	0	40	1	28	0.42029
NCOA3	0	40	1	28	0.42029
NECAB1	0	40	1	28	0.42029
NF2	0	40	1	28	0.42029
NFATC3	0	40	1	28	0.42029
NKAPL	0	40	1	28	0.42029
NLRP12	0	40	1	28	0.42029
NRG2	0	40	1	28	0.42029
OR4C15	0	40	1	28	0.42029
OR5L2	0	40	1	28	0.42029
PBRM1	0	40	1	28	0.42029
PCDHA8	0	40	1	28	0.42029
PCDHB12	0	40	1	28	0.42029
PCDHB4	0	40	1	28	0.42029
PCM1	0	40	1	28	0.42029
PDGFRA	0	40	1	28	0.42029
PHKA2	0	40	1	28	0.42029
PHKB	0	40	1	28	0.42029
PKD1L1	0	40	1	28	0.42029
PKP4	0	40	1	28	0.42029
PLIN5	0	40	1	28	0.42029
PROKR2	0	40	1	28	0.42029
RANBP17	0	40	1	28	0.42029
RBM15	0	40	1	28	0.42029
SETD2	0	40	1	28	0.42029
SLC26A3	0	40	1	28	0.42029
SLITRK3	0	40	1	28	0.42029
SMAD4	0	40	1	28	0.42029
SMC6	0	40	1	28	0.42029
SPAG17	0	40	1	28	0.42029
STYK1	0	40	1	28	0.42029
TAP2	0	40	1	28	0.42029
TDRD3	0	40	1	28	0.42029
TP63	0	40	1	28	0.42029
WHSC1L1	0	40	1	28	0.42029
ZEB2	0	40	1	28	0.42029
ZNF180	0	40	1	28	0.42029
ZNF439	0	40	1	28	0.42029
ZNF699	0	40	1	28	0.42029
ZNF823	0	40	1	28	0.42029
TTN	13	27	12	17	0.460722
ABCA4	2	38	0	29	0.505541
ABCA6	2	38	0	29	0.505541
ASH1L	2	38	0	29	0.505541
CELSR3	2	38	0	29	0.505541
DOK6	2	38	0	29	0.505541
ERBB4	2	38	0	29	0.505541
GRM8	2	38	0	29	0.505541
LRRTM1	2	38	0	29	0.505541
MYH1	2	38	0	29	0.505541
NCOR1	2	38	0	29	0.505541
PCDHB11	2	38	0	29	0.505541
PKHD1	2	38	0	29	0.505541
PLCB1	2	38	0	29	0.505541
RASA1	2	38	0	29	0.505541
RGAG1	2	38	0	29	0.505541
VWA5A	2	38	0	29	0.505541
WBSCR17	2	38	0	29	0.505541
WDR63	2	38	0	29	0.505541
CDH12	1	39	2	27	0.568271
HDX	1	39	2	27	0.568271
C1orf173	3	37	1	28	0.633685
KEAP1	3	37	1	28	0.633685
MACF1	3	37	1	28	0.633685
THSD7A	3	37	1	28	0.633685
AHNAK	2	38	3	26	0.643077
DNAH5	2	38	3	26	0.643077
SPTA1	5	35	2	27	0.690481
FAT1	4	36	4	25	0.712447
LRP1B	5	35	5	24	0.731892
ZFHX4	5	35	5	24	0.731892
MLL2	7	33	4	25	0.750069
ABCA9	1	39	1	28	1
CARD11	1	39	1	28	1
CASP8	1	39	1	28	1
DSCAM	1	39	1	28	1
DSPP	1	39	1	28	1
EP300	1	39	1	28	1
EPHA2	1	39	1	28	1
FAT4	1	39	1	28	1
HRAS	1	39	1	28	1
HUWE1	3	37	2	27	1
HYDIN	1	39	1	28	1
KDR	1	39	1	28	1
KIAA1549	1	39	1	28	1
LRFN5	1	39	1	28	1
MEF2C	1	39	1	28	1
NLRP4	1	39	1	28	1
NUMA1	1	39	1	28	1
PIK3C2G	3	37	2	27	1
PIK3CG	3	37	2	27	1
PLEC	1	39	1	28	1
POLQ	1	39	1	28	1
PRDM9	1	39	1	28	1
PTPRF	1	39	1	28	1
PZP	1	39	1	28	1
RB1CC1	3	37	2	27	1
SFRS14	1	39	1	28	1
SLCO5A1	1	39	1	28	1
TET2	1	39	1	28	1
TRIO	1	39	1	28	1
TSC1	1	39	1	28	1
WRN	1	39	1	28	1
YTHDC1	1	39	1	28	1
ZNF804B	3	37	2	27	1
ABHD13	0	40	0	29	1
ABL2	1	39	0	29	1
ACACB	0	40	0	29	1
ADAMTS12	2	38	1	28	1
ADAMTSL1	0	40	0	29	1
AKAP1	1	39	0	29	1
AKT1	1	39	0	29	1
AKT3	1	39	0	29	1
ANKHD1-EIF4EBP3	1	39	0	29	1
ANKRD17	1	39	0	29	1
ANO4	1	39	0	29	1
APC	1	39	0	29	1
APOB	2	38	2	27	1
ARFGEF2	0	40	0	29	1
ARID1A	1	39	0	29	1
ASXL1	1	39	0	29	1
ATM	1	39	0	29	1
B2M	0	40	0	29	1
BAGE2	1	39	0	29	1
BAZ1B	1	39	0	29	1
BBS9	0	40	0	29	1
BCL9	0	40	0	29	1
BIRC3	0	40	0	29	1
BRCA1	0	40	0	29	1
BRCA2	1	39	0	29	1
CABIN1	0	40	0	29	1
CCNA1	1	39	0	29	1
CCR2	1	39	0	29	1
CCR5	1	39	0	29	1
CD8A	0	40	0	29	1
CDH1	0	40	0	29	1
CDH10	0	40	0	29	1
CDH11	1	39	0	29	1
CDH9	4	36	3	26	1
CDKN2A	8	32	5	24	1
CHD5	0	40	0	29	1
CLCN4	0	40	0	29	1
CLSTN2	0	40	0	29	1
COL11A1	2	38	1	28	1
COL22A1	1	39	0	29	1
COL6A3	1	39	0	29	1
COQ3	1	39	0	29	1
CREBBP	0	40	0	29	1
CRIPAK	0	40	0	29	1
CSMD3	12	28	8	21	1
CTNNB1	1	39	0	29	1
CTNND2	0	40	0	29	1
CUBN	2	38	1	28	1
CYP26A1	0	40	0	29	1
DCC	1	39	0	29	1
DCT	0	40	0	29	1
DDX3X	0	40	0	29	1
DPYS	1	39	0	29	1
DUSP5	0	40	0	29	1
E2F7	0	40	0	29	1
EBF1	1	39	0	29	1
ENPP2	1	39	0	29	1
EP400	0	40	0	29	1
EPHA1	1	39	0	29	1
EPHB1	0	40	0	29	1
EPHB3	0	40	0	29	1
EPM2AIP1	1	39	0	29	1
ERAS	0	40	0	29	1
ERBB3	0	40	0	29	1
ETV6	0	40	0	29	1
EWSR1	0	40	0	29	1
EZH2	0	40	0	29	1
FAM135B	2	38	2	27	1
FAM179B	2	38	1	28	1
FAM5B	0	40	0	29	1
FANCA	1	39	0	29	1
FANCD2	0	40	0	29	1
FANCG	0	40	0	29	1
FANCM	1	39	0	29	1
FARP2	0	40	0	29	1
FBXW7	2	38	2	27	1
FGFR1	1	39	0	29	1
FGFR2	0	40	0	29	1
FGFR3	0	40	0	29	1
FGFR4	0	40	0	29	1
FLG2	0	40	0	29	1
FOXP1	1	39	0	29	1
FSTL5	1	39	0	29	1
GABRB3	1	39	0	29	1
GC	1	39	0	29	1
GNAQ	1	39	0	29	1
HBS1L	0	40	0	29	1
[truncated: 592 more rows]
